# Supplementary material for: Design of N–N ylide bond-based high energy density materials: a theoretical survey
Source: Royal Society of Chemistry journal article supplement (doi:10.1039/d3ra08799a), 2024-01-01
Supplement: d3ra08799a1.pdf [file d3ra08799a1.pdf]

## Supporting Information

### Design of N-N ylide bond based high energy density materials: a theoretical survey

Jingfan Xin,<sup>\*,a</sup> Xiaoxu Bo,<sup>b</sup> Wenmin Xiao,<sup>a</sup> Yihong Ding,<sup>\*,c</sup> Ruifa Jin,<sup>\*,a</sup> and Suhua Yang<sup>a</sup>

<sup>a</sup> Inner Mongolia Key Laboratory of Photoelectric Functional Materials, College of Chemistry and Chemical Engineering, Chifeng University, Chifeng 024000, P. R. China.

<sup>b</sup> Department of Agriculture and Biotechnology, Wenzhou Vocational College of Science and Technology, No. 1000 Lihongqiao Road, Wenzhou 325006, People's Republic of China.

<sup>c</sup> Key Laboratory of Carbon Materials of Zhejiang Province, Wenzhou Key Lab of Advanced Energy Storage and Conversion, Zhejiang Province Key Lab of Leather Engineering, College of Chemistry and Materials Engineering, Wenzhou University, Wenzhou 325035, P. R. China; Laboratory of Theoretical and Computational Chemistry, Institute of Theoretical Chemistry, Jilin University, Changchun, China.

Table S1. Cartesian coordinates of the optimized structures at the B3LYP/6-311G(2d,d,p) level.

```
"if"----"lowest frequency(cm-1)"
#####
SP2-I-1-CH3 b3lyp/6-311g(2d,d,p) if=133.6028

6  0.485878  -1.281380  -0.000066
6  1.818375  -0.970767  -0.000016
6  2.254226  0.362960  0.000071
6  1.273025  1.341462  -0.000004
6  -0.074977  1.018061  -0.000080
1  0.084431  -2.283136  -0.000186
1  2.527166  -1.790130  -0.000043
1  3.306160  0.613130  0.000136
1  1.534368  2.393376  -0.000101
1  -0.844745  1.768864  -0.000030
7  -0.499935  -0.301226  0.000061
7  -1.742862  -0.729331  0.000074
6  -2.730577  0.318150  -0.000020
1  -2.678371  0.973906  -0.888460
1  -3.706494  -0.166795  -0.000143
1  -2.678640  0.973779  0.888571
#####
SP2-I-1-CN b3lyp/6-311g(2d,d,p) if=94.0628

6  -0.869674  -1.274887  -0.000066
6  -2.167521  -0.820436  0.000063
```

|   |           |           |           |
|---|-----------|-----------|-----------|
| 6 | -2.439201 | 0.549479  | 0.000213  |
| 6 | -1.358140 | 1.423636  | 0.000227  |
| 6 | -0.062088 | 0.943650  | 0.000096  |
| 1 | -0.578478 | -2.314303 | -0.000186 |
| 1 | -2.965640 | -1.551652 | 0.000045  |
| 1 | -3.456582 | 0.917001  | 0.000314  |
| 1 | -1.502516 | 2.496635  | 0.000340  |
| 1 | 0.813813  | 1.576433  | 0.000101  |
| 7 | 0.186183  | -0.403265 | -0.000051 |
| 7 | 1.415193  | -0.971038 | -0.000187 |
| 6 | 2.414796  | -0.109019 | -0.000169 |
| 7 | 3.338678  | 0.603067  | -0.000161 |

#####

SP2-l-1-COOH b3lyp/6-311g(2d,d,p) if=44.5225

|   |           |           |           |
|---|-----------|-----------|-----------|
| 6 | 1.174620  | -1.302283 | 0.000186  |
| 6 | 2.515011  | -1.000321 | 0.000376  |
| 6 | 2.934712  | 0.331467  | 0.000107  |
| 6 | 1.955222  | 1.314006  | -0.000329 |
| 6 | 0.608901  | 0.986691  | -0.000435 |
| 1 | 0.769771  | -2.302672 | 0.000321  |
| 1 | 3.225498  | -1.816945 | 0.000650  |
| 1 | 3.986550  | 0.586306  | 0.000242  |
| 1 | 2.216306  | 2.365009  | -0.000564 |
| 1 | -0.196766 | 1.702895  | -0.000526 |
| 7 | 0.211394  | -0.326319 | -0.000189 |
| 7 | -1.052378 | -0.825008 | -0.000448 |
| 6 | -2.082245 | 0.057763  | 0.000107  |
| 8 | -2.099791 | 1.287900  | 0.000768  |
| 8 | -3.251673 | -0.642169 | -0.000326 |
| 1 | -3.940078 | 0.034909  | 0.000718  |

#####

SP2-l-1-H b3lyp/6-311g(2d,d,p) if=189.7533

|   |           |           |           |
|---|-----------|-----------|-----------|
| 6 | -0.246967 | -1.189496 | 0.000101  |
| 6 | 1.126749  | -1.176780 | -0.000030 |
| 6 | 1.843769  | 0.023033  | -0.000176 |
| 6 | 1.099228  | 1.198834  | -0.000185 |
| 6 | -0.279987 | 1.170970  | -0.000053 |
| 1 | -0.854385 | -2.081492 | 0.000216  |
| 1 | 1.637771  | -2.132133 | -0.000016 |
| 1 | 2.924746  | 0.037127  | -0.000279 |
| 1 | 1.583723  | 2.168175  | -0.000296 |
| 1 | -0.891330 | 2.062472  | -0.000060 |

7 -0.988416 -0.019713 0.000095  
7 -2.296573 -0.128639 0.000233  
1 -2.662354 0.824940 0.000205

#####

SP2-I-1-NH2 b3lyp/6-311g(2d,d,p) if=139.8932

6 -0.084921 1.026894 0.028326  
6 1.263797 1.339565 0.017406  
6 2.241652 0.355664 -0.015116  
6 1.799884 -0.976536 -0.018301  
6 0.466558 -1.283196 0.000472  
1 -0.871331 1.758308 0.090733  
1 1.531606 2.389850 0.032847  
1 3.294431 0.600898 -0.038295  
1 2.505402 -1.798612 -0.034143  
1 0.063596 -2.284555 -0.001244  
7 -0.506336 -0.292771 0.020872  
7 -1.758890 -0.710377 0.004770  
7 -2.645802 0.396446 0.048084  
1 -2.717534 0.823786 -0.883572  
1 -3.550793 -0.017100 0.240871

#####

SP2-I-1-NO2 b3lyp/6-311g(2d,d,p) if=57.7327

6 -1.065876 -1.290637 0.122948  
6 -2.408683 -1.002893 0.241029  
6 -2.850613 0.309318 0.084898  
6 -1.909342 1.290835 -0.207296  
6 -0.571963 0.966492 -0.338788  
1 -0.635501 -2.273924 0.240215  
1 -3.093831 -1.808551 0.469644  
1 -3.899354 0.558001 0.184962  
1 -2.201887 2.322687 -0.352821  
1 0.193282 1.685977 -0.569390  
7 -0.156250 -0.320145 -0.163757  
7 1.121146 -0.807984 -0.390582  
7 2.116976 0.027688 0.063219  
8 1.868834 1.086260 0.667150  
8 3.244047 -0.388735 -0.161089

#####

SP2-I-1-OH b3lyp/6-311g(2d,d,p) if=153.1243

6 -0.456834 -1.288580 -0.000127  
6 -1.788405 -0.975184 -0.000163

|   |           |           |           |
|---|-----------|-----------|-----------|
| 6 | -2.224922 | 0.358307  | -0.000088 |
| 6 | -1.243057 | 1.339402  | 0.000031  |
| 6 | 0.104885  | 1.027366  | 0.000072  |
| 1 | -0.060319 | -2.292484 | -0.000184 |
| 1 | -2.496715 | -1.794931 | -0.000257 |
| 1 | -3.276938 | 0.607054  | -0.000121 |
| 1 | -1.507708 | 2.390446  | 0.000097  |
| 1 | 0.893700  | 1.756544  | 0.000165  |
| 7 | 0.516205  | -0.295722 | -0.000009 |
| 7 | 1.762780  | -0.710258 | 0.000036  |
| 8 | 2.585604  | 0.445255  | 0.000186  |
| 1 | 3.460255  | 0.045332  | 0.000273  |

#####

SP2-I-2-CH3 b3lyp/6-311g(2d,d,p) if=135.7076

|   |           |           |           |
|---|-----------|-----------|-----------|
| 6 | 0.057995  | 1.011884  | -0.000438 |
| 6 | -1.298592 | 1.288249  | -0.000032 |
| 6 | -1.827411 | -0.894623 | 0.000225  |
| 6 | -0.511294 | -1.266029 | -0.000266 |
| 1 | 0.807047  | 1.783491  | -0.000686 |
| 1 | -1.600954 | 2.332120  | 0.000156  |
| 1 | -2.581421 | -1.675473 | 0.000287  |
| 1 | -0.150972 | -2.283024 | -0.000478 |
| 7 | 0.495362  | -0.305726 | -0.000397 |
| 7 | 1.724354  | -0.731804 | 0.000157  |
| 7 | -2.271619 | 0.379784  | 0.000361  |
| 6 | 2.722380  | 0.311081  | 0.000321  |
| 1 | 3.694276  | -0.180328 | 0.000934  |
| 1 | 2.668808  | 0.961565  | -0.888952 |
| 1 | 2.668064  | 0.962492  | 0.889032  |

#####

SP2-I-2-CN b3lyp/6-311g(2d,d,p) if=102.0333

|   |           |           |           |
|---|-----------|-----------|-----------|
| 6 | -0.891049 | -1.256621 | 0.000057  |
| 6 | -2.168125 | -0.743897 | 0.000114  |
| 6 | -1.393366 | 1.375044  | 0.000047  |
| 6 | -0.079763 | 0.941901  | -0.000011 |
| 1 | -0.639941 | -2.306164 | 0.000059  |
| 1 | -3.005758 | -1.433025 | 0.000163  |
| 1 | -1.584114 | 2.443291  | 0.000044  |
| 1 | 0.777650  | 1.598862  | -0.000060 |
| 7 | 0.182084  | -0.404165 | -0.000008 |
| 7 | 1.395057  | -0.967571 | -0.000056 |
| 7 | -2.454441 | 0.566348  | 0.000109  |

6 2.404307 -0.111038 -0.000114  
7 3.337320 0.586059 -0.000155  
#####  
SP2-I-2-COOH b3lyp/6-311g(2d,d,p) if=52.9057

6 -0.621814 0.980630 0.000049  
6 -1.980514 1.259589 0.000043  
6 -2.519111 -0.925729 -0.000037  
6 -1.193157 -1.287448 -0.000004  
1 0.158725 1.722433 0.000122  
1 -2.285486 2.301245 0.000060  
1 -3.273673 -1.704969 -0.000049  
1 -0.827289 -2.302456 0.000123  
7 -0.209487 -0.329640 -0.000014  
7 1.036296 -0.826143 0.000006  
7 -2.948689 0.345284 -0.000017  
6 2.076832 0.060194 -0.000021  
8 2.086098 1.285549 -0.000077  
8 3.235380 -0.646226 0.000031  
1 3.935656 0.019251 0.000125  
#####  
SP2-I-2-H b3lyp/6-311g(2d,d,p) if=191.8457

6 -0.222468 -1.180984 -0.000030  
6 1.148819 -1.110686 -0.000008  
6 1.118381 1.136324 -0.000005  
6 -0.259448 1.161281 0.000011  
1 -0.797713 -2.093824 -0.000059  
1 1.708317 -2.041126 -0.000047  
1 1.646846 2.085405 0.000037  
1 -0.844038 2.070363 0.000070  
7 -0.982646 -0.022413 -0.000036  
7 -2.278210 -0.129753 0.000062  
7 1.864338 0.026621 -0.000022  
1 -2.649489 0.822382 0.000157  
#####  
SP2-I-2-NH2 b3lyp/6-311g(2d,d,p) if=145.8228

6 0.490127 -1.270549 -0.004834  
6 1.805404 -0.902525 0.024484  
6 1.288354 1.284860 -0.017110  
6 -0.069319 1.021451 -0.038804  
1 0.127719 -2.286892 -0.003539  
1 2.555628 -1.686740 0.047706

1 1.598098 2.326518 -0.034848  
1 -0.827449 1.780063 -0.118979  
7 -0.505487 -0.297836 -0.028327  
7 -1.741838 -0.708500 -0.011968  
7 2.257191 0.371083 0.027396  
7 -2.636313 0.379150 -0.045150  
1 -3.554610 -0.044890 -0.101975  
1 -2.601655 0.905236 0.835555

#####

SP2-I-2-NO2 b3lyp/6-311g(2d,d,p) if=42.2528

6 -1.131163 -1.276394 0.105672  
6 -2.460293 -0.925675 0.132909  
6 -1.946907 1.249799 -0.145134  
6 -0.586101 0.979344 -0.188844  
1 -0.755875 -2.283640 0.201725  
1 -3.205006 -1.702956 0.263962  
1 -2.263556 2.282059 -0.252279  
1 0.169733 1.732762 -0.308013  
7 -0.165384 -0.316460 -0.055773  
7 1.081326 -0.853696 -0.153016  
7 -2.900072 0.335315 0.014757  
7 2.144154 0.020629 0.028629  
8 1.984875 1.186222 0.415449  
8 3.225291 -0.497620 -0.187347

#####

SP2-I-2-OH b3lyp/6-311g(2d,d,p) if=154.2317

6 0.479614 -1.273396 -0.000045  
6 1.794994 -0.900985 -0.000079  
6 1.270312 1.285352 -0.000024  
6 -0.086117 1.022704 0.000018  
1 0.121718 -2.291323 -0.000052  
1 2.546573 -1.684299 -0.000122  
1 1.578304 2.327385 -0.000011  
1 -0.852825 1.775170 0.000061  
7 -0.512754 -0.297693 0.000005  
7 -1.746951 -0.707501 0.000047  
7 2.242505 0.371710 -0.000074  
8 -2.572308 0.433908 0.000115  
1 -3.447724 0.034145 0.000146

#####

SP2-I-3-CH3 b3lyp/6-311g(2d,d,p) if=129.4507

|   |           |           |           |
|---|-----------|-----------|-----------|
| 6 | 0.555382  | 1.278178  | -0.000197 |
| 6 | 1.844363  | 0.842613  | 0.000240  |
| 6 | 1.152773  | -1.283992 | -0.000231 |
| 1 | 0.223887  | 2.304342  | -0.000203 |
| 1 | 2.650142  | 1.569299  | 0.000497  |
| 1 | 1.353912  | -2.351708 | 0.000414  |
| 7 | -0.467829 | 0.329623  | -0.000405 |
| 7 | -1.679265 | 0.735172  | -0.000066 |
| 7 | -0.151080 | -0.999773 | -0.000500 |
| 7 | 2.192979  | -0.466266 | 0.000423  |
| 6 | -2.668752 | -0.324103 | 0.000446  |
| 1 | -3.645705 | 0.156861  | 0.000060  |
| 1 | -2.574171 | -0.973503 | -0.878996 |
| 1 | -2.574294 | -0.972748 | 0.880509  |

#####

SP2-I-3-CN b3lyp/6-311g(2d,d,p) if=103.7259

|   |           |           |           |
|---|-----------|-----------|-----------|
| 6 | 0.919908  | -1.256063 | 0.000251  |
| 6 | 2.175986  | -0.705946 | 0.000126  |
| 6 | 1.284924  | 1.349393  | -0.000142 |
| 1 | 0.681750  | -2.308029 | 0.000309  |
| 1 | 3.043448  | -1.357011 | 0.000131  |
| 1 | 1.386368  | 2.429496  | -0.000149 |
| 7 | -0.156948 | -0.401403 | 0.000325  |
| 7 | -1.352505 | -0.928924 | 0.000053  |
| 7 | 0.020162  | 0.934256  | 0.000041  |
| 7 | 2.395228  | 0.619513  | -0.000022 |
| 6 | -2.372359 | -0.073454 | -0.000268 |
| 7 | -3.357697 | 0.541123  | -0.000409 |

#####

SP2-I-3-COOH b3lyp/6-311g(2d,d,p) if=57.1322

|   |           |           |           |
|---|-----------|-----------|-----------|
| 6 | 1.241308  | -1.270965 | -0.191220 |
| 6 | 2.532665  | -0.810068 | -0.171788 |
| 6 | 1.788658  | 1.251957  | 0.270304  |
| 1 | 0.929893  | -2.286939 | -0.374905 |
| 1 | 3.349015  | -1.501456 | -0.352249 |
| 1 | 1.967610  | 2.303107  | 0.471495  |
| 7 | 0.220745  | -0.375655 | 0.038490  |
| 7 | -0.988797 | -0.848245 | 0.074741  |
| 7 | 0.500963  | 0.921398  | 0.289027  |
| 7 | 2.846254  | 0.475150  | 0.053943  |
| 6 | -2.040459 | 0.052544  | -0.102133 |
| 8 | -2.059895 | 1.067691  | -0.753725 |

8 -3.136594 -0.467371 0.497827  
1 -3.861803 0.133389 0.278462  
#####  
SP2-I-3-H b3lyp/6-311g(2d,d,p) if=163.9171

6 0.198532 1.196211 0.000162  
6 -1.163117 1.088674 0.000035  
6 -1.010260 -1.141077 -0.000218  
1 0.767700 2.112153 0.000206  
1 -1.764408 1.992171 0.000025  
1 -1.466971 -2.126470 -0.000326  
7 0.953395 0.030567 0.000267  
7 2.228516 0.099673 -0.000020  
7 0.318686 -1.180286 -0.000056  
7 -1.820309 -0.088427 -0.000128  
1 2.550735 -0.871387 -0.000229  
#####  
SP2-I-3-NH2 b3lyp/6-311g(2d,d,p) if=129.4649

6 0.527926 1.291929 -0.004467  
6 1.812371 0.863260 -0.001844  
6 1.147373 -1.279379 -0.001076  
1 0.187638 2.315435 -0.006022  
1 2.614065 1.594001 -0.002046  
1 1.361406 -2.345163 -0.002172  
7 -0.484211 0.321270 -0.000901  
7 -1.707588 0.694249 -0.006152  
7 -0.162328 -1.016576 0.001462  
7 2.175865 -0.452427 0.001187  
7 -2.590309 -0.336787 0.087193  
1 -3.480371 -0.053561 -0.294846  
1 -2.228755 -1.233677 -0.230112  
#####  
SP2-I-3-NO2 b3lyp/6-311g(2d,d,p) if=43.0200

6 1.302791 1.271476 0.000370  
6 2.526748 0.662734 0.000272  
6 1.550825 -1.351018 -0.000493  
1 1.115555 2.333595 0.000807  
1 3.422485 1.274576 0.000556  
1 1.602211 -2.434905 -0.001072  
7 0.180213 0.461221 -0.000167  
7 -0.976377 1.039844 -0.000130  
7 0.302176 -0.884859 -0.000573



7 2.690215 -0.674150 -0.000239  
7 -2.048757 0.031244 0.000188  
8 -2.464933 -0.281197 1.088943  
8 -2.466908 -0.279492 -1.088285

#####

SP2-I-3-OH b3lyp/6-311g(2d,d,p) if=131.4706

6 0.498168 1.277642 -0.000081  
6 1.796764 0.878530 -0.000299  
6 1.167403 -1.269313 -0.000206  
1 0.138543 2.294429 -0.000226  
1 2.580108 1.629223 -0.000567  
1 1.400957 -2.330226 0.000340  
7 -0.486074 0.285004 0.000450  
7 -1.710605 0.673546 0.000097  
7 -0.145716 -1.034041 0.000281  
7 2.184255 -0.421019 -0.000254  
8 -2.546893 -0.429500 0.000051  
1 -3.411497 -0.003023 -0.000462

#####

SP2-I-4-CH3 b3lyp/6-311g(2d,d,p) if=95.8772

6 1.751639 -0.858358 -0.000076  
6 1.153647 1.275625 0.000089  
1 2.511601 -1.634222 -0.000374  
1 1.382560 2.338056 0.000200  
7 -0.445390 -0.334170 0.000268  
7 -1.638428 -0.742303 -0.000287  
7 -0.144540 1.007743 0.000845  
7 2.168444 0.419722 -0.000838  
7 0.522160 -1.316823 0.000548  
6 -2.641667 0.305861 -0.000433  
1 -2.549585 0.953483 -0.880101  
1 -3.611556 -0.187762 -0.001068  
1 -2.550453 0.952497 0.880099

#####

SP2-I-4-CN b3lyp/6-311g(2d,d,p) if=96.3637

6 1.288366 1.339544 -0.000092  
6 2.081519 -0.732807 -0.000220  
1 1.415959 2.417307 -0.000167  
1 2.902436 -1.442107 -0.000381  
7 -0.137329 -0.404051 0.000575  
7 -1.313344 -0.931031 0.000124

7 0.883522 -1.290605 0.000156  
7 2.374458 0.571391 -0.000298  
7 0.023625 0.941106 0.000278  
6 -2.339524 -0.080182 -0.000183  
7 -3.331012 0.522544 -0.000333

#####

SP2-I-4-COOH b3lyp/6-311g(2d,d,p) if=34.9985

6 2.467831 -0.697262 -0.018274  
6 1.604920 1.344237 0.005650  
1 3.314940 -1.376027 -0.031330  
1 1.697751 2.426152 0.014185  
7 0.229311 -0.453522 -0.003232  
7 -0.911626 -0.993903 0.004882  
7 0.355183 0.910676 0.000736  
7 2.719082 0.616275 -0.001192  
7 1.296632 -1.304248 -0.019751  
6 -2.010310 -0.094313 0.116666  
8 -2.495862 0.234214 1.160346  
8 -2.494978 0.198127 -1.099537  
1 -3.280689 0.748233 -0.963687

#####

SP2-I-4-H b3lyp/6-311g(2d,d,p) if=117.4995

6 1.008071 1.133060 0.000007  
6 1.077348 -1.081987 0.000121  
1 1.487652 2.107809 0.000003  
1 1.623384 -2.020573 0.000199  
7 -0.927975 -0.050785 -0.000232  
7 -2.186762 -0.130388 0.000088  
7 -0.233717 -1.228325 -0.000009  
7 1.787122 0.051120 0.000103  
7 -0.311595 1.182129 -0.000114  
1 -2.513063 0.840059 0.000180

#####

SP2-I-4-NH2 b3lyp/6-311g(2d,d,p) if=96.1933

6 1.151246 1.271100 0.001556  
6 1.715363 -0.882644 -0.000161  
1 1.402289 2.328905 0.006591  
1 2.469328 -1.664303 0.003075  
7 -0.457770 -0.318748 0.005078  
7 -1.668799 -0.696319 -0.000639  
7 0.488082 -1.330814 0.013945

7 2.150392 0.397389 -0.014373  
7 -0.151110 1.032081 0.011137  
7 -2.558114 0.311220 -0.081683  
1 -3.463711 0.011963 0.244525  
1 -2.226326 1.229036 0.203183

#####

SP2-I-4-NO2 b3lyp/6-311g(2d,d,p) if=60.4319

6 1.550688 1.342545 -0.000260  
6 2.429820 -0.694259 0.000046  
1 1.632897 2.424883 -0.000498  
1 3.281736 -1.366536 0.000171  
7 0.197262 -0.458352 0.000070  
7 -0.939646 -1.040553 0.000371  
7 1.262333 -1.308174 0.000233  
7 2.667383 0.622486 -0.000205  
7 0.301747 0.896993 -0.000152  
7 -2.025271 -0.032369 0.000021  
8 -2.440552 0.267611 -1.089726  
8 -2.439988 0.268854 1.089632

#####

SP2-I-4-OH b3lyp/6-311g(2d,d,p) if=98.3086

6 -1.169486 1.260185 -0.000200  
6 -1.699268 -0.896021 -0.000268  
1 -1.436929 2.313152 -0.000212  
1 -2.431915 -1.697488 -0.000404  
7 0.460535 -0.284088 0.000132  
7 1.671879 -0.679428 0.000255  
7 -0.455887 -1.313700 -0.000051  
7 -2.156406 0.367946 -0.000354  
7 0.137549 1.046082 0.000049  
8 2.512816 0.408256 0.000350  
1 3.375157 -0.024382 0.000408

#####

SP2-I-5-CH3 b3lyp/6-311g(2d,d,p) if=82.8422

6 -0.000123 1.008926 0.200719  
1 -0.705436 1.784132 0.459377  
7 -0.450370 -0.297810 0.068052  
7 -1.629279 -0.736831 -0.065247  
7 1.256317 1.300124 0.002792  
7 2.151053 0.350596 -0.230212  
7 1.762253 -0.912942 -0.024499

7 0.559338 -1.293934 0.164075  
6 -2.664662 0.281628 -0.114488  
1 -2.469790 1.040664 -0.885162  
1 -3.597403 -0.227382 -0.346377  
1 -2.783849 0.794841 0.850055

#####

SP2-I-5-CN b3lyp/6-311g(2d,d,p) if=64.5892

6 0.960626 1.223631 0.000119  
1 0.755620 2.287183 0.000173  
7 -0.138122 0.385560 -0.000002  
7 -1.319447 0.909931 -0.000026  
7 2.161324 0.746087 0.000169  
7 2.351816 -0.592882 0.000103  
7 1.307552 -1.379475 0.000001  
7 0.067390 -0.968332 -0.000056  
6 -2.351818 0.065733 -0.000122  
7 -3.346009 -0.532798 -0.000210

#####

SP2-I-5-COOH b3lyp/6-311g(2d,d,p) if=38.9348

6 -0.665683 0.985472 -0.107807  
1 0.064439 1.765447 -0.249480  
7 -0.228070 -0.320201 -0.078029  
7 0.961830 -0.825772 -0.011151  
7 -1.937018 1.259654 0.087503  
7 -2.828097 0.303301 0.223327  
7 -2.433823 -0.953758 -0.018002  
7 -1.212274 -1.303459 -0.175677  
6 2.037703 0.060256 0.005670  
8 2.038877 1.270202 -0.116745  
8 3.155632 -0.661114 0.177829  
1 3.889533 -0.030876 0.177838

#####

SP2-I-5-H b3lyp/6-311g(2d,d,p) if=63.7930

6 -0.153090 1.181079 0.000087  
1 -0.698621 2.116807 0.000150  
7 -0.926783 0.023000 -0.000022  
7 -2.189772 0.081975 -0.000066  
7 1.135220 1.127396 0.000107  
7 1.773283 -0.066478 0.000030  
7 1.048195 -1.157470 -0.000050  
1 -2.519729 -0.889986 -0.000143

7 -0.249158 -1.196037 -0.000075  
#####  
SP2-I-5-NH2 b3lyp/6-311g(2d,d,p) if=58.0178

6 -0.567888 1.267915 -0.016419  
1 -0.251247 2.305545 -0.042569  
7 0.459514 0.315830 -0.006762  
7 1.678974 0.680340 0.022643  
7 -1.792020 0.914806 0.004467  
7 -2.123133 -0.441709 0.035265  
7 -1.167964 -1.307742 -0.000078  
7 0.113590 -1.047878 -0.042648  
7 2.544836 -0.338273 -0.051697  
1 3.468624 -0.073401 0.249371  
1 2.193382 -1.267248 0.163382  
#####  
SP2-I-5-NO2 b3lyp/6-311g(2d,d,p) if=38.0455

6 -1.352757 1.238335 0.000347  
1 -1.213520 2.312403 0.000743  
7 -0.196061 0.462006 0.000196  
7 0.940206 1.039744 0.000648  
7 -2.517541 0.688108 0.000076  
7 -2.639192 -0.661663 -0.000414  
7 -1.552345 -1.384232 -0.000447  
7 -0.337632 -0.916746 -0.000188  
7 2.041316 0.018630 0.000010  
8 2.447836 -0.277926 -1.090651  
8 2.447015 -0.279992 1.090402  
#####  
SP2-I-5-OH b3lyp/6-311g(2d,d,p) if=16.2151

6 0.534334 1.252948 0.000012  
1 0.198958 2.283805 0.000059  
7 -0.467771 0.276325 0.000237  
7 -1.681809 0.657724 0.000315  
7 1.772164 0.928078 -0.000299  
7 2.137183 -0.396878 -0.000407  
7 1.197130 -1.293112 -0.000286  
7 -0.088699 -1.074594 0.000018  
8 -2.512279 -0.433169 0.000320  
1 -3.384116 -0.018936 0.000265  
#####  
SP2-I-6-CH3 b3lyp/6-311g(2d,d,p) if=120.0816

7 0.412139 -0.329798 -0.113308  
7 1.563118 -0.734636 0.134301  
7 -1.125558 1.304907 -0.043764  
7 -2.002812 0.429605 0.392329  
7 -1.758599 -0.858672 0.072427  
7 -0.612347 -1.291965 -0.255724  
7 0.081085 0.984742 -0.402789  
6 2.590169 0.299919 0.167507  
1 2.320016 1.116715 0.844231  
1 3.509489 -0.178601 0.495260  
1 2.730301 0.733098 -0.828840

#####

SP2-I-6-CN b3lyp/6-311g(2d,d,p) if=100.1827

7 0.109485 -0.397736 0.118396  
7 1.253630 -0.913994 -0.083776  
7 -2.086736 -0.731983 -0.093687  
7 -2.221731 0.566524 -0.379104  
7 -1.267243 1.364871 0.059318  
7 -0.091486 0.933810 0.387914  
7 -0.959691 -1.263204 0.207772  
6 2.297285 -0.079583 -0.092107  
7 3.294671 0.509927 -0.137884

#####

SP2-I-6-COOH b3lyp/6-311g(2d,d,p) if=48.5062

7 0.245738 0.475762 -0.039811  
7 -0.860383 0.946719 0.289465  
7 1.559222 -1.309103 -0.390547  
7 2.541169 -0.675968 0.221699  
7 2.460104 0.660584 0.237746  
7 1.370317 1.300381 0.053293  
7 0.410632 -0.768079 -0.629299  
6 -2.000536 0.106065 0.020197  
8 -2.709345 0.278369 -0.922352  
8 -2.177998 -0.752285 1.026817  
1 -2.985636 -1.257131 0.845276

#####

SP2-I-6-H b3lyp/6-311g(2d,d,p) if=154.2863

7 -0.891056 -0.047269 -0.039474  
7 -2.096944 -0.132298 0.262562  
7 1.084147 -1.099802 -0.010825

7 1.663911 0.056262 0.321287  
7 1.006308 1.155006 -0.016148  
1 -2.446762 0.833533 0.313124  
7 -0.251486 1.162914 -0.293720  
7 -0.165342 -1.213890 -0.268415

#####

SP2-I-6-NH2 b3lyp/6-311g(2d,d,p) if=119.0994

7 -0.422407 -0.312694 -0.085299  
7 -1.604521 -0.683509 0.132674  
7 1.723704 -0.887291 0.049787  
7 1.994544 0.406442 0.382665  
7 1.122694 1.303448 -0.030492  
7 -0.087074 1.013537 -0.376563  
7 0.580200 -1.309246 -0.266427  
7 -2.492743 0.299362 0.190589  
1 -2.255396 1.213260 -0.179628  
1 -3.445389 -0.023608 0.201085

#####

SP2-I-6-NO2 b3lyp/6-311g(2d,d,p) if=62.9458

7 -0.218297 0.480420 -0.051140  
7 0.867689 1.010933 0.270985  
7 -2.441718 0.661962 0.162868  
7 -2.507745 -0.674894 0.252035  
7 -1.504715 -1.338352 -0.282802  
7 -0.353130 -0.808641 -0.537009  
7 -1.364187 1.304633 -0.048866  
7 2.011338 0.001108 0.095253  
8 2.596197 0.113039 -0.941546  
8 2.225722 -0.670561 1.062887

#####

SP2-I-6-OH b3lyp/6-311g(2d,d,p) if=125.3617

7 0.433468 -0.285463 0.120309  
7 1.600743 -0.668684 -0.135230  
7 -1.699730 -0.895917 -0.071568  
7 -1.984118 0.371884 -0.414834  
7 -1.141288 1.286732 0.037858  
7 0.065613 1.031829 0.408275  
7 -0.546887 -1.291486 0.284580  
8 2.451497 0.396975 -0.152902  
1 3.293418 -0.018064 -0.382515

#####

SP2-II-1-CH3 b3lyp/6-311g(2d,d,p) if=121.5221

|   |           |           |           |
|---|-----------|-----------|-----------|
| 6 | -1.649992 | -0.982869 | 0.184038  |
| 6 | -2.035878 | 0.484852  | -0.104211 |
| 6 | -0.733183 | 1.189544  | 0.079611  |
| 6 | -0.161853 | -1.046662 | -0.160959 |
| 1 | -1.791331 | -1.200452 | 1.245063  |
| 1 | -2.235103 | -1.703661 | -0.389750 |
| 1 | -2.818750 | 0.846898  | 0.568918  |
| 1 | -2.429865 | 0.592901  | -1.127651 |
| 1 | -0.554968 | 2.251061  | 0.147605  |
| 1 | 0.027856  | -1.334929 | -1.198371 |
| 1 | 0.416243  | -1.697469 | 0.491455  |
| 7 | 0.312164  | 0.376859  | -0.000723 |
| 7 | 1.561409  | 0.760669  | -0.024372 |
| 6 | 2.538991  | -0.306974 | 0.043298  |
| 1 | 2.470253  | -1.048961 | -0.769909 |
| 1 | 3.518125  | 0.166353  | -0.040666 |
| 1 | 2.534023  | -0.861786 | 0.998306  |

#####

SP2-II-1-CN b3lyp/6-311g(2d,d,p) if=98.5001

|   |           |           |           |
|---|-----------|-----------|-----------|
| 6 | 2.320716  | -0.224268 | -0.203336 |
| 6 | 1.751584  | 1.186228  | 0.096318  |
| 6 | 0.274838  | 0.969771  | 0.010291  |
| 6 | 1.160732  | -1.172578 | 0.120352  |
| 1 | 2.580674  | -0.300198 | -1.260790 |
| 1 | 3.213177  | -0.452379 | 0.378978  |
| 1 | 2.103368  | 1.941638  | -0.611060 |
| 1 | 2.033882  | 1.537520  | 1.097643  |
| 1 | -0.505705 | 1.716799  | -0.016689 |
| 1 | 1.184187  | -1.568238 | 1.138045  |
| 1 | 1.029943  | -2.001676 | -0.572400 |
| 7 | -0.037550 | -0.299598 | 0.020132  |
| 7 | -1.213718 | -0.938290 | 0.001387  |
| 6 | -2.254272 | -0.117035 | -0.021935 |
| 7 | -3.200319 | 0.562719  | -0.044929 |

#####

SP2-II-1-COOH b3lyp/6-311g(2d,d,p) if=49.8045

|   |          |           |           |
|---|----------|-----------|-----------|
| 6 | 2.318874 | 0.967435  | 0.035470  |
| 6 | 2.703043 | -0.529670 | 0.066418  |
| 6 | 1.378111 | -1.195548 | 0.219699  |
| 6 | 0.855516 | 0.975635  | -0.410884 |



1 2.401568 1.391138 1.038413  
1 2.953116 1.553532 -0.629984  
1 3.393066 -0.781122 0.875734  
1 3.184257 -0.848954 -0.868523  
1 1.180296 -2.234130 0.442586  
1 0.727646 1.052767 -1.493903  
1 0.215997 1.704574 0.072944  
7 0.372340 -0.409930 -0.034207  
7 -0.882468 -0.870108 -0.137281  
6 -1.868392 0.046485 0.062370  
8 -1.813807 1.217309 0.425781  
8 -3.071929 -0.543430 -0.185403  
1 -3.722073 0.145404 0.001687

#####

SP2-II-1-H b3lyp/6-311g(2d,d,p) if=161.5469

6 1.413104 -0.714519 -0.192734  
6 1.405982 0.804574 0.108167  
6 -0.045157 1.145210 -0.031664  
6 -0.008459 -1.160714 0.152033  
1 1.608387 -0.878500 -1.254821  
1 2.167713 -1.259145 0.376616  
1 2.045515 1.362998 -0.582611  
1 1.785574 1.010438 1.120374  
1 -0.484729 2.130525 -0.087768  
1 -0.123737 -1.484783 1.188731  
1 -0.433014 -1.921404 -0.500098  
7 -0.827334 0.076664 -0.005171  
7 -2.117920 -0.109371 -0.048552  
1 -2.541749 0.821511 -0.099177

#####

SP2-II-1-NH2 b3lyp/6-311g(2d,d,p) if=132.9155

6 1.983748 -0.403560 -0.256330  
6 1.610757 1.050129 0.121493  
6 0.115374 1.032644 0.018082  
6 0.744087 -1.210599 0.138581  
1 2.146453 -0.475258 -1.334268  
1 2.883510 -0.760933 0.246592  
1 2.078770 1.779342 -0.547303  
1 1.956680 1.291433 1.138398  
1 -0.558454 1.866010 0.114850  
1 0.776927 -1.561555 1.173004  
1 0.510774 -2.051826 -0.511503

7 -0.355060 -0.217735 0.045346  
7 -1.561363 -0.700292 0.010809  
7 -2.482392 0.374961 0.014519  
1 -2.334426 0.962703 -0.818298  
1 -3.392324 -0.060137 -0.087149

#####

SP2-II-1-NO2 b3lyp/6-311g(2d,d,p) if=66.5547

6 -2.670389 -0.446767 0.206262  
6 -2.274249 1.016075 -0.092207  
6 -0.780921 0.993580 -0.007549  
6 -1.406612 -1.240414 -0.131039  
1 -2.912610 -0.558656 1.264826  
1 -3.530595 -0.781520 -0.372892  
1 -2.709810 1.731828 0.609525  
1 -2.586694 1.332828 -1.096086  
1 -0.113347 1.834861 0.024124  
1 -1.383238 -1.618444 -1.154844  
1 -1.174855 -2.058057 0.547438  
7 -0.311097 -0.227000 -0.019720  
7 0.895789 -0.836192 -0.002996  
7 1.982186 0.014812 0.014836  
8 3.059983 -0.559577 0.021211  
8 1.844521 1.249699 0.026322

#####

SP2-II-1-OH b3lyp/6-311g(2d,d,p) if=138.3640

6 1.977977 -0.412575 -0.230166  
6 1.603736 1.050810 0.108401  
6 0.109292 1.034554 0.002348  
6 0.727680 -1.209026 0.155501  
1 2.162642 -0.508200 -1.302385  
1 2.864614 -0.764445 0.299253  
1 2.071287 1.761336 -0.580473  
1 1.948259 1.322768 1.117767  
1 -0.570643 1.866656 -0.024025  
1 0.738275 -1.545163 1.194799  
1 0.502731 -2.057855 -0.488259  
7 -0.360068 -0.207660 0.019334  
7 -1.564943 -0.698453 -0.011771  
8 -2.432565 0.434546 -0.049310  
1 -3.293683 0.008740 -0.091640

#####

SP2-II-2-CH3 b3lyp/6-311g(2d,d,p) if=103.2104

|   |           |           |           |
|---|-----------|-----------|-----------|
| 6 | -1.674814 | -0.915925 | 0.191137  |
| 6 | -0.744484 | 1.163147  | 0.085470  |
| 6 | -0.201328 | -1.049815 | -0.212055 |
| 1 | -1.797729 | -1.180261 | 1.245473  |
| 1 | -2.340055 | -1.544440 | -0.401490 |
| 1 | -0.617531 | 2.225945  | 0.201925  |
| 1 | -0.040332 | -1.326975 | -1.258384 |
| 1 | 0.359075  | -1.727097 | 0.427705  |
| 7 | 0.301452  | 0.360355  | -0.038388 |
| 7 | 1.558486  | 0.746763  | -0.095371 |
| 7 | -1.996847 | 0.515866  | 0.022994  |
| 1 | -2.482111 | 0.687539  | -0.856787 |
| 6 | 2.522444  | -0.317148 | 0.096156  |
| 1 | 3.509220  | 0.141565  | 0.017410  |
| 1 | 2.471204  | -0.795333 | 1.092391  |
| 1 | 2.485714  | -1.123389 | -0.657138 |

#####

SP2-II-2-CN b3lyp/6-311g(2d,d,p) if=90.5093

|   |           |           |           |
|---|-----------|-----------|-----------|
| 6 | 2.313529  | 0.128173  | -0.162757 |
| 6 | 0.292689  | -0.945238 | 0.031343  |
| 6 | 1.196142  | 1.149938  | 0.105142  |
| 1 | 3.190615  | 0.289726  | 0.462772  |
| 1 | 2.616677  | 0.150101  | -1.215488 |
| 1 | -0.449297 | -1.729039 | 0.036407  |
| 1 | 1.144459  | 1.966654  | -0.611855 |
| 1 | 1.221803  | 1.560845  | 1.117076  |
| 7 | -0.020854 | 0.322238  | -0.013090 |
| 7 | -1.215185 | 0.978385  | -0.014771 |
| 7 | 1.650497  | -1.153512 | 0.168699  |
| 1 | 2.022219  | -1.985931 | -0.269208 |
| 6 | -2.234328 | 0.137443  | -0.022391 |
| 7 | -3.150839 | -0.586289 | -0.030514 |

#####

SP2-II-2-COOH b3lyp/6-311g(2d,d,p) if=35.9555

|   |           |           |           |
|---|-----------|-----------|-----------|
| 6 | -2.399186 | 0.827765  | 0.281827  |
| 6 | -1.368825 | -1.154024 | -0.239903 |
| 6 | -0.873210 | 1.030422  | 0.215557  |
| 1 | -2.939319 | 1.587112  | -0.283189 |
| 1 | -2.762345 | 0.829330  | 1.315747  |
| 1 | -1.229063 | -2.206383 | -0.431763 |
| 1 | -0.441430 | 1.469706  | 1.111855  |

1 -0.536633 1.601346 -0.645314  
7 -0.372388 -0.378615 0.065398  
7 0.889972 -0.853863 0.286125  
7 -2.572631 -0.508061 -0.327759  
1 -3.402970 -1.035486 -0.099407  
6 1.851595 0.031749 -0.048405  
8 1.760508 1.158621 -0.539047  
8 3.081302 -0.492662 0.244157  
1 3.700361 0.195000 -0.029616

#####

SP2-II-2-H b3lyp/6-311g(2d,d,p) if=165.0953

6 1.427262 -0.630425 -0.207214  
6 -0.027889 1.126469 -0.015109  
6 0.038279 -1.153741 0.176132  
1 1.623106 -0.815157 -1.267038  
1 2.233166 -1.077805 0.374836  
1 -0.422035 2.125157 -0.118148  
1 -0.055910 -1.479752 1.215237  
1 -0.355422 -1.928107 -0.477974  
7 -0.809502 0.060921 0.015162  
7 -2.105799 -0.145837 -0.061269  
7 1.358667 0.834379 0.011417  
1 1.786504 1.094225 0.898612  
1 -2.538881 0.781374 -0.105555

#####

SP2-II-2-NH2 b3lyp/6-311g(2d,d,p) if=142.0149

6 1.977773 0.326547 0.238629  
6 0.133767 -1.022334 -0.014231  
6 0.781223 1.184636 -0.197583  
1 2.162421 0.457995 1.308668  
1 2.894643 0.562920 -0.301901  
1 -0.502838 -1.867162 0.177601  
1 0.814021 1.496015 -1.245149  
1 0.589326 2.052286 0.430025  
7 -0.333683 0.224056 -0.030819  
7 -1.543201 0.726001 0.031917  
7 1.554875 -1.071544 -0.000245  
1 1.931774 -1.422578 -0.878346  
7 -2.453367 -0.361872 0.127347  
1 -3.368085 0.067979 0.203826  
1 -2.450208 -0.897031 -0.753011

#####

SP2-II-2-NO2 b3lyp/6-311g(2d,d,p) if=69.3914

|   |           |           |           |
|---|-----------|-----------|-----------|
| 6 | 2.668642  | 0.360397  | -0.180111 |
| 6 | 0.799969  | -0.967910 | 0.070397  |
| 6 | 1.430483  | 1.231244  | 0.083961  |
| 1 | 3.516739  | 0.636541  | 0.445475  |
| 1 | 2.970583  | 0.406423  | -1.232190 |
| 1 | 0.173134  | -1.839943 | 0.094129  |
| 1 | 1.266132  | 2.018599  | -0.647771 |
| 1 | 1.419097  | 1.665086  | 1.085958  |
| 7 | 0.320109  | 0.251641  | 0.003134  |
| 7 | -0.913461 | 0.864455  | 0.024392  |
| 7 | 2.163374  | -0.981296 | 0.161736  |
| 1 | 2.650895  | -1.795708 | -0.182269 |
| 7 | -1.955995 | -0.002780 | -0.017878 |
| 8 | -3.064556 | 0.521331  | -0.004052 |
| 8 | -1.771610 | -1.241022 | -0.072011 |

#####

SP2-II-2-OH b3lyp/6-311g(2d,d,p) if=139.5209

|   |           |           |           |
|---|-----------|-----------|-----------|
| 6 | -1.966905 | 0.323768  | -0.241386 |
| 6 | -0.126155 | -1.020394 | 0.007133  |
| 6 | -0.768526 | 1.189542  | 0.179740  |
| 1 | -2.153225 | 0.440489  | -1.312587 |
| 1 | -2.881521 | 0.569515  | 0.298383  |
| 1 | 0.515598  | -1.877004 | -0.072392 |
| 1 | -0.795827 | 1.516881  | 1.222409  |
| 1 | -0.583013 | 2.047040  | -0.463890 |
| 7 | 0.341333  | 0.220226  | 0.032213  |
| 7 | 1.549340  | 0.725295  | -0.028610 |
| 7 | -1.545859 | -1.069907 | 0.016210  |
| 1 | -1.909688 | -1.404609 | 0.906939  |
| 8 | 2.412059  | -0.420944 | -0.025598 |
| 1 | 3.267031  | -0.011548 | -0.185688 |

#####

SP2-II-3-CH3 b3lyp/6-311g(2d,d,p) if=163.0066

|   |           |           |           |
|---|-----------|-----------|-----------|
| 7 | 0.268092  | -0.410473 | -0.015895 |
| 7 | 1.492859  | -0.762642 | -0.049121 |
| 7 | -0.720795 | -1.227230 | -0.114463 |
| 6 | -1.935694 | -0.465257 | 0.136137  |
| 1 | -2.745163 | -0.832138 | -0.496371 |
| 1 | -2.246132 | -0.578104 | 1.185044  |
| 6 | -1.554230 | 0.992602  | -0.160765 |

1 -2.102726 1.710796 0.449183  
1 -1.690510 1.230788 -1.222602  
7 -0.141156 0.980177 0.225600  
1 0.444745 1.572209 -0.353581  
6 2.459179 0.317053 0.024136  
1 3.443067 -0.147580 0.071343  
1 2.455896 0.969497 -0.866148  
1 2.332290 0.949321 0.913236

#####

SP2-II-3-CN b3lyp/6-311g(2d,d,p) if=109.6014

7 0.051662 -0.484631 -0.011242  
7 -1.148573 -1.005399 0.032891  
7 1.101741 -1.184176 0.085879  
6 2.233487 -0.271827 -0.087991  
1 3.034056 -0.547339 0.597618  
1 2.608355 -0.368625 -1.114121  
6 1.650235 1.128481 0.169356  
1 2.112268 1.902177 -0.441937  
1 1.711071 1.405992 1.227966  
7 0.269510 0.902273 -0.263012  
1 -0.463435 1.446141 0.185027  
6 -2.139031 -0.122322 0.011025  
7 -3.055835 0.594171 0.011356

#####

SP2-II-3-COOH b3lyp/6-311g(2d,d,p) if=89.1844

7 0.417508 -0.463882 -0.038328  
7 -0.821800 -0.904850 -0.049994  
7 1.386669 -1.246275 0.192779  
6 2.611251 -0.464684 0.003245  
1 3.343967 -0.749351 0.757280  
1 3.023386 -0.698635 -0.986451  
6 2.151488 0.998491 0.089584  
1 2.719899 1.664713 -0.558066  
1 2.177165 1.375982 1.119572  
7 0.785974 0.853164 -0.407250  
1 0.040139 1.481790 -0.089091  
6 -1.802984 0.043864 0.035773  
8 -1.717843 1.258574 0.216677  
8 -3.005393 -0.553984 -0.079409  
1 -3.655649 0.155658 0.006551

#####

SP2-II-3-H b3lyp/6-311g(2d,d,p) if=195.6243

7 -0.782574 -0.145537 -0.000957  
7 -2.059173 -0.138191 0.045898  
7 -0.043489 -1.182493 0.094273  
6 1.336837 -0.759633 -0.106197  
1 1.998472 -1.305545 0.568115  
1 1.647563 -0.979425 -1.136381  
6 1.334394 0.757308 0.156849  
1 2.053656 1.294718 -0.461338  
1 1.522995 0.975762 1.214416  
7 -0.034171 1.095060 -0.245630  
1 -0.462710 1.798349 0.349168  
1 -2.351521 0.828219 -0.092980

#####

SP2-II-3-NH2 b3lyp/6-311g(2d,d,p) if=149.5890

7 0.263467 -0.403499 0.009541  
7 1.505480 -0.763614 -0.031029  
7 -0.714731 -1.228315 -0.088317  
6 -1.931076 -0.443050 0.116436  
1 -2.723665 -0.813054 -0.534811  
1 -2.272951 -0.532565 1.157568  
6 -1.511441 1.000883 -0.198013  
1 -2.067943 1.745808 0.370813  
1 -1.592498 1.217873 -1.270691  
7 -0.122278 0.956980 0.258527  
1 0.570798 1.536777 -0.211098  
7 2.340176 0.410047 -0.050214  
1 2.693651 0.560252 0.896059  
1 3.142920 0.136726 -0.607942

#####

SP2-II-3-NO2 b3lyp/6-311g(2d,d,p) if=80.2036

7 -0.372170 -0.443623 0.021874  
7 0.867092 -0.935785 0.076579  
7 -1.324249 -1.221220 -0.272209  
6 -2.562619 -0.478021 -0.025242  
1 -3.293109 -0.729351 -0.792659  
1 -2.960081 -0.787523 0.949213  
6 -2.125820 0.993533 -0.016109  
1 -2.701315 1.606797 0.675221  
1 -2.154678 1.437179 -1.018336  
7 -0.754181 0.841340 0.473698  
1 -0.035595 1.494411 0.153643

7 1.882077 0.016348 -0.034813  
8 2.986579 -0.434213 0.177950  
8 1.661601 1.194961 -0.374811  
#####  
SP2-II-3-OH b3lyp/6-311g(2d,d,p) if=153.1324

7 -0.281396 -0.396958 -0.009603  
7 -1.517202 -0.753142 0.006772  
7 0.693296 -1.230739 0.131883  
6 1.907083 -0.458861 -0.125286  
1 2.717184 -0.826524 0.504787  
1 2.216261 -0.554056 -1.176648  
6 1.504231 0.990717 0.184585  
1 2.061280 1.726944 -0.394432  
1 1.594369 1.212155 1.255396  
7 0.109902 0.959755 -0.262394  
1 -0.547573 1.570601 0.210215  
8 -2.294600 0.443240 0.015867  
1 -3.184794 0.081408 0.051348  
#####  
SP2-II-4-CH3 b3lyp/6-311g(2d,d,p) if=148.5692

7 0.297348 0.219543 -0.047355  
7 1.468668 0.730691 0.007765  
7 -1.495653 -1.054862 -0.020618  
1 -1.780509 -1.328915 -0.961268  
7 -1.981720 0.286445 0.208516  
1 -2.128379 0.353226 1.211423  
6 -0.893813 1.138886 -0.183997  
1 -0.935251 1.429975 -1.236867  
1 -0.756611 2.010085 0.450193  
7 -0.056494 -1.027846 -0.013277  
6 2.503208 -0.285899 0.071282  
1 2.489159 -0.938575 -0.813170  
1 3.465013 0.220513 0.137685  
1 2.365158 -0.942027 0.943072  
#####  
SP2-II-4-CN b3lyp/6-311g(2d,d,p) if=103.5615

7 0.047768 -0.469540 0.011713  
7 -1.147107 -1.010900 -0.076973  
7 2.205598 -0.293337 -0.026983  
1 2.739772 -0.433109 0.829550  
7 1.745231 1.070363 -0.129750



1 1.857834 1.321297 -1.107480  
6 0.353777 1.021263 0.212291  
1 0.141054 1.222813 1.265689  
1 -0.279770 1.629809 -0.427959  
7 1.109655 -1.166024 -0.009350  
6 -2.141190 -0.132850 -0.030347  
7 -3.066062 0.573541 -0.004581

#####

SP2-II-4-COOH b3lyp/6-311g(2d,d,p) if=38.3836

7 0.391364 0.222188 0.046614  
7 -0.791719 0.783307 0.014845  
7 2.179531 -0.999339 -0.048508  
1 2.529454 -1.434233 0.803834  
7 2.674641 0.353442 -0.170884  
1 2.883733 0.470035 -1.157874  
6 1.557697 1.179258 0.194830  
1 1.553769 1.485137 1.244494  
1 1.409079 2.037086 -0.454152  
7 0.773051 -0.992962 0.017845  
6 -1.878892 -0.075687 -0.011244  
8 -1.908996 -1.285807 0.014413  
8 -3.003824 0.685837 -0.073486  
1 -3.734376 0.053865 -0.084613

#####

SP2-II-4-H b3lyp/6-311g(2d,d,p) if=198.9350

7 -0.774565 -0.128994 -0.003119  
7 -2.060332 -0.134154 -0.075497  
7 1.330668 -0.763517 0.021789  
1 1.660312 -0.981052 0.962720  
7 1.391422 0.670055 -0.149823  
1 1.557456 0.817476 -1.140861  
6 0.082087 1.127184 0.200047  
1 -0.022231 1.385097 1.257945  
1 -0.285396 1.931117 -0.434562  
7 -0.038099 -1.180540 -0.049620  
1 -2.346314 0.844313 -0.051640

#####

SP2-II-4-NH2 b3lyp/6-311g(2d,d,p) if=126.9115

7 -0.269524 -0.392584 0.000085  
7 -1.508153 -0.763131 -0.110335  
7 1.924615 -0.458564 0.021472

1 2.310837 -0.572353 0.959237  
7 1.603801 0.932389 -0.165593  
1 1.717721 1.107448 -1.159649  
6 0.222585 1.054170 0.194611  
1 0.069503 1.285506 1.251437  
1 -0.352459 1.731121 -0.426138  
7 0.710450 -1.223184 -0.020392  
7 -2.345013 0.405531 -0.009658  
1 -3.079660 0.257790 -0.696793  
1 -2.814683 0.362269 0.895183

#####

SP2-II-4-NO2 b3lyp/6-311g(2d,d,p) if=69.3712

7 -0.344286 0.424233 0.030069  
7 0.879416 0.935940 0.157992  
7 -2.486398 0.470125 -0.227654  
1 -3.122780 0.907253 0.435861  
7 -2.218562 -0.907634 0.079341  
1 -2.263559 -1.396311 -0.810715  
6 -0.868714 -0.920075 0.570133  
1 -0.786148 -0.821352 1.656632  
1 -0.275691 -1.742878 0.195348  
7 -1.308980 1.183683 -0.293559  
7 1.878192 -0.018400 -0.066161  
8 1.617670 -1.115822 -0.578456  
8 2.990429 0.360587 0.246189

#####

SP2-II-4-OH b3lyp/6-311g(2d,d,p) if=140.2163

7 -0.284407 -0.398723 0.002056  
7 -1.516692 -0.760926 -0.024755  
7 1.909638 -0.454813 0.051859  
1 2.207093 -0.555124 1.023872  
7 1.581335 0.930369 -0.152824  
1 1.706068 1.099754 -1.146699  
6 0.195938 1.045996 0.190884  
1 0.020573 1.280159 1.243620  
1 -0.368000 1.717779 -0.448229  
7 0.705867 -1.230723 -0.105856  
8 -2.291098 0.438168 -0.017936  
1 -3.182772 0.079829 -0.067751

#####

SP2-II-5-CH3 b3lyp/6-311g(2d,d,p) if=142.7243

7 -0.292776 -0.217847 -0.000484  
7 -1.450748 -0.729467 0.026724  
7 1.517135 1.017267 -0.076848  
1 1.721927 1.227336 -1.056094  
7 0.087389 1.022203 0.063578  
7 0.845317 -1.161997 -0.094721  
1 0.854653 -1.422883 -1.082000  
1 2.081806 -0.377654 1.189647  
7 1.947510 -0.329202 0.182865  
6 -2.491591 0.286259 0.025504  
1 -2.400893 0.962705 -0.835538  
1 -3.451736 -0.225761 -0.003071  
1 -2.433002 0.912009 0.926240

#####

SP2-II-5-CN b3lyp/6-311g(2d,d,p) if=98.9389

7 -0.058791 0.471357 0.010067  
7 1.135340 0.974382 -0.029189  
7 -2.214360 0.252869 0.011946  
1 -2.642489 0.353719 0.934142  
7 -1.128809 1.153624 -0.063389  
7 -0.320019 -1.000456 0.148099  
1 -0.167531 -1.175105 1.144737  
1 -1.741640 -1.260814 -1.155274  
7 -1.686082 -1.075939 -0.156601  
6 2.135633 0.097069 -0.034249  
7 3.092416 -0.561583 -0.023519

#####

SP2-II-5-COOH b3lyp/6-311g(2d,d,p) if=31.5807

7 -0.389745 -0.226326 -0.025202  
7 0.776279 -0.787902 -0.055798  
7 -2.202860 0.967621 -0.027495  
1 -2.434727 1.363388 0.885234  
7 -0.790509 0.976432 -0.143512  
7 -1.503847 -1.185721 0.178297  
1 -1.448958 -1.395350 1.177152  
1 -2.835098 -0.558128 -1.091732  
7 -2.633923 -0.404516 -0.106871  
6 1.867069 0.077425 0.002891  
8 1.888117 1.279129 0.129747  
8 2.987573 -0.678788 -0.090595  
1 3.723077 -0.054304 -0.037150

#####

SP2-II-5-H b3lyp/6-311g(2d,d,p) if=211.3764

|   |           |           |           |
|---|-----------|-----------|-----------|
| 7 | -0.772980 | -0.134063 | -0.015015 |
| 7 | -2.042268 | -0.095466 | -0.032015 |
| 7 | 1.331221  | -0.732018 | 0.079216  |
| 1 | 1.581236  | -0.881984 | 1.059163  |
| 7 | -0.020468 | -1.169479 | -0.094784 |
| 7 | 0.052811  | 1.146127  | 0.114367  |
| 1 | -0.004711 | 1.329727  | 1.119471  |
| 1 | 1.461235  | 0.776884  | -1.178816 |
| 1 | -2.292937 | 0.885518  | -0.151881 |
| 7 | 1.345281  | 0.683450  | -0.172902 |

#####

SP2-II-5-NH2 b3lyp/6-311g(2d,d,p) if=179.6183

|   |           |           |           |
|---|-----------|-----------|-----------|
| 7 | -0.275041 | -0.404111 | -0.000467 |
| 7 | -1.494895 | -0.731534 | 0.044837  |
| 7 | 1.903122  | -0.434174 | 0.118672  |
| 1 | 2.065839  | -0.505433 | 1.127067  |
| 7 | 0.736831  | -1.206125 | -0.207908 |
| 7 | 0.166617  | 1.048799  | 0.096406  |
| 1 | 0.014433  | 1.267964  | 1.083989  |
| 1 | 1.664163  | 1.049729  | -1.148309 |
| 7 | 1.551960  | 0.934358  | -0.143793 |
| 7 | -2.358806 | 0.376714  | 0.055223  |
| 1 | -2.079816 | 1.088134  | -0.621708 |
| 1 | -3.273136 | 0.012114  | -0.181831 |

#####

SP2-II-5-NO2 b3lyp/6-311g(2d,d,p) if=94.5274

|   |           |           |           |
|---|-----------|-----------|-----------|
| 7 | 0.332760  | 0.419546  | -0.009025 |
| 7 | -0.850908 | 0.925001  | 0.282471  |
| 7 | 2.474227  | 0.450514  | -0.166369 |
| 1 | 2.990936  | 0.391513  | -1.043816 |
| 7 | 1.301998  | 1.142160  | -0.370196 |
| 7 | 0.787544  | -1.022402 | 0.282866  |
| 1 | 0.555583  | -1.491159 | -0.592304 |
| 1 | 2.342210  | -0.711518 | 1.413816  |
| 7 | 2.163327  | -0.843382 | 0.421001  |
| 7 | -1.858064 | -0.004251 | -0.031697 |
| 8 | -2.951773 | 0.276476  | 0.408996  |
| 8 | -1.591342 | -0.983869 | -0.739128 |

#####

SP2-II-5-OH b3lyp/6-311g(2d,d,p) if=172.0029

|   |           |           |           |
|---|-----------|-----------|-----------|
| 7 | -0.278805 | -0.375832 | -0.017417 |
| 7 | -1.501729 | -0.718876 | 0.067518  |
| 7 | 1.892338  | -0.446072 | 0.121759  |
| 1 | 2.065317  | -0.531298 | 1.126973  |
| 7 | 0.711719  | -1.201799 | -0.193416 |
| 7 | 0.166578  | 1.048983  | 0.076860  |
| 1 | -0.014605 | 1.296703  | 1.051511  |
| 1 | 1.685457  | 1.043713  | -1.140113 |
| 7 | 1.556705  | 0.921976  | -0.138471 |
| 8 | -2.297881 | 0.441611  | -0.056053 |
| 1 | -3.180770 | 0.059340  | -0.007789 |

#####

SP3-1-CH3 b3lyp/6-311g(2d,d,p) if=72.5092

|   |           |           |           |
|---|-----------|-----------|-----------|
| 7 | -0.586565 | 0.400990  | 0.027881  |
| 7 | -2.050241 | 0.240379  | 0.014892  |
| 6 | -0.441531 | 1.880532  | 0.134263  |
| 1 | -0.966782 | 2.305333  | -0.717321 |
| 1 | -0.958972 | 2.178746  | 1.042447  |
| 1 | 0.603916  | 2.185094  | 0.151562  |
| 6 | -2.449741 | -1.143216 | -0.080328 |
| 1 | -2.167512 | -1.695205 | -1.005475 |
| 1 | -3.543277 | -1.109858 | -0.083735 |
| 1 | -2.176766 | -1.814657 | 0.765161  |
| 6 | 1.597704  | -0.000951 | -1.263148 |
| 1 | 1.924226  | 1.043905  | -1.287706 |
| 1 | 1.954121  | -0.454060 | -2.194013 |
| 6 | 0.069415  | -0.088463 | -1.249901 |
| 1 | -0.399774 | 0.482144  | -2.050715 |
| 1 | -0.241610 | -1.127972 | -1.357519 |
| 6 | 2.208754  | -0.713303 | -0.049907 |
| 1 | 3.295237  | -0.589801 | -0.040570 |
| 1 | 2.013678  | -1.790024 | -0.126520 |
| 6 | 1.596220  | -0.180071 | 1.251181  |
| 1 | 1.921963  | 0.850928  | 1.424064  |
| 1 | 1.951727  | -0.760360 | 2.108942  |
| 6 | 0.068027  | -0.265862 | 1.223529  |
| 1 | -0.242744 | -1.310266 | 1.181031  |
| 1 | -0.402880 | 0.184474  | 2.096824  |

#####

SP3-l-1-CN b3lyp/6-311g(2d,d,p) if=95.6148

|   |           |           |           |
|---|-----------|-----------|-----------|
| 7 | -0.314488 | 0.643129  | -0.000128 |
| 7 | -1.791486 | 0.751621  | -0.000087 |
| 6 | 0.124490  | 2.067843  | -0.000740 |
| 1 | -0.300218 | 2.535433  | -0.885541 |
| 1 | -0.299440 | 2.536032  | 0.884118  |
| 1 | 1.209712  | 2.139670  | -0.001220 |
| 6 | 1.681984  | -0.327278 | -1.260109 |
| 1 | 2.230220  | 0.615187  | -1.362617 |
| 1 | 1.908725  | -0.911247 | -2.156958 |
| 6 | 0.174504  | -0.077556 | -1.244514 |
| 1 | -0.167912 | 0.524154  | -2.085831 |
| 1 | -0.375487 | -1.020224 | -1.258563 |
| 6 | 2.139410  | -1.071812 | 0.000270  |
| 1 | 3.226197  | -1.188205 | 0.000183  |
| 1 | 1.711236  | -2.080646 | 0.000763  |
| 6 | 1.682286  | -0.326213 | 1.260126  |
| 1 | 2.230457  | 0.616396  | 1.361642  |
| 1 | 1.909316  | -0.909371 | 2.157432  |
| 6 | 0.174782  | -0.076627 | 1.244658  |
| 1 | -0.375071 | -1.019364 | 1.259456  |
| 1 | -0.167545 | 0.525613  | 2.085635  |
| 6 | -2.328756 | -0.452351 | 0.000647  |
| 7 | -2.841510 | -1.506102 | 0.000139  |

#####

SP3-I-1-COOH b3lyp/6-311g(2d,d,p) if=108.6595

|   |           |           |           |
|---|-----------|-----------|-----------|
| 7 | 0.046448  | 0.675847  | 0.000153  |
| 7 | -1.409118 | 0.845087  | 0.000150  |
| 6 | 0.529460  | 2.090377  | 0.000403  |
| 1 | 0.119234  | 2.572568  | -0.883111 |
| 1 | 0.119979  | 2.572119  | 0.884514  |
| 1 | 1.616276  | 2.129594  | 0.000005  |
| 6 | 2.040966  | -0.301633 | -1.260325 |
| 1 | 2.603000  | 0.633261  | -1.359062 |
| 1 | 2.265592  | -0.887831 | -2.156581 |
| 6 | 0.534745  | -0.043145 | -1.252968 |
| 1 | 0.207789  | 0.577173  | -2.087329 |
| 1 | -0.020663 | -0.978792 | -1.265220 |
| 6 | 2.485883  | -1.054648 | -0.000235 |
| 1 | 3.571089  | -1.188137 | -0.000244 |
| 1 | 2.039282  | -2.055010 | -0.000485 |
| 6 | 2.040897  | -0.302290 | 1.260234  |
| 1 | 2.602890  | 0.632580  | 1.359388  |
| 1 | 2.265617  | -0.888873 | 2.156221  |

6 0.534663 -0.043762 1.252943  
1 -0.020733 -0.979409 1.264689  
1 0.207642 0.576103 2.087614  
6 -2.074524 -0.318278 -0.000109  
8 -1.672574 -1.493681 -0.000106  
8 -3.424352 -0.076647 -0.000140  
1 -3.815428 -0.958987 -0.000202

#####

SP3-I-1-H b3lyp/6-311g(2d,d,p) if=161.3612

7 -0.943010 -0.000005 -0.074107  
7 -2.227388 0.000020 -0.735713  
6 -1.296984 -0.000016 1.374811  
1 -1.908378 0.882770 1.543776  
1 -1.907996 -0.883042 1.543911  
1 -0.414395 0.000211 2.013756  
6 1.286534 1.263047 0.183108  
1 1.235120 1.371287 1.271718  
1 1.796840 2.157576 -0.188306  
6 -0.123162 1.233429 -0.416225  
1 -0.741906 2.079038 -0.119182  
1 -0.075806 1.230050 -1.507286  
6 2.076245 -0.000015 -0.185663  
1 3.050985 -0.000026 0.310044  
1 2.271424 -0.000023 -1.265139  
6 1.286498 -1.263057 0.183112  
1 1.235039 -1.371271 1.271722  
1 1.796795 -2.157602 -0.188270  
6 -0.123175 -1.233404 -0.416270  
1 -0.075749 -1.229968 -1.507329  
1 -0.741930 -2.079035 -0.119310  
1 -1.962992 0.000031 -1.728597

#####

SP3-I-1-NH2 b3lyp/6-311g(2d,d,p) if=136.4450

7 -0.560488 -0.421319 -0.000856  
7 -2.112944 -0.158256 -0.000321  
6 -0.523006 -1.897659 -0.003785  
1 -1.064328 -2.234153 0.878137  
1 -1.064566 -2.230716 -0.886863  
1 0.498794 -2.276771 -0.004639  
6 1.595614 0.075695 1.258992  
1 1.923507 -0.966023 1.351191  
1 1.948884 0.589263 2.159050

6 0.066104 0.156035 1.230430  
1 -0.398420 -0.355699 2.073787  
1 -0.266299 1.196746 1.239468  
6 2.207222 0.705662 0.001439  
1 3.294416 0.585608 0.001193  
1 2.005934 1.783709 0.003672  
6 1.595627 0.080906 -1.258726  
1 1.923557 -0.960402 -1.355265  
1 1.948853 0.598227 -2.156650  
6 0.066108 0.161067 -1.229789  
1 -0.266262 1.201810 -1.234521  
1 -0.398422 -0.347139 -2.075264  
7 -2.269838 1.235660 0.002442  
1 -2.764644 1.567961 -0.823115  
1 -2.764121 1.564749 0.829590

#####

SP3-I-1-NO2 b3lyp/6-311g(2d,d,p) if=106.3678

7 0.008139 0.646740 0.000099  
7 -1.473845 0.821036 0.000062  
6 0.436948 2.081092 0.000512  
1 0.015940 2.551376 -0.884315  
1 0.015839 2.550887 0.885552  
1 1.521266 2.150605 0.000592  
6 2.024966 -0.267011 -1.259849  
1 2.565742 0.681082 -1.350738  
1 2.267397 -0.843162 -2.157627  
6 0.512959 -0.043363 -1.262624  
1 0.180912 0.585269 -2.088601  
1 -0.019402 -0.989943 -1.298357  
6 2.479820 -1.014330 -0.000199  
1 3.566768 -1.129971 -0.000165  
1 2.050175 -2.022132 -0.000506  
6 2.024807 -0.267705 1.259807  
1 2.565576 0.680334 1.351293  
1 2.267116 -0.844355 2.157297  
6 0.512803 -0.044048 1.262510  
1 -0.019579 -0.990639 1.297656  
1 0.180651 0.584140 2.088783  
7 -2.156132 -0.346583 -0.000095  
8 -3.375766 -0.212038 -0.000148  
8 -1.594155 -1.472919 -0.000137

#####

SP3-I-1-OH b3lyp/6-311g(2d,d,p) if=132.5646



|   |           |           |           |
|---|-----------|-----------|-----------|
| 7 | 0.603422  | -0.388425 | 0.112516  |
| 7 | 2.095564  | -0.126017 | -0.003217 |
| 6 | 0.588766  | -1.806229 | 0.543288  |
| 1 | 1.173635  | -2.361493 | -0.187328 |
| 1 | 1.089508  | -1.861445 | 1.507619  |
| 1 | -0.427037 | -2.191981 | 0.608972  |
| 6 | -1.581071 | -0.316921 | -1.212405 |
| 1 | -1.893045 | -1.345362 | -0.996438 |
| 1 | -1.949967 | -0.090513 | -2.217706 |
| 6 | -0.054383 | -0.209021 | -1.234349 |
| 1 | 0.415174  | -0.943159 | -1.888047 |
| 1 | 0.267821  | 0.780636  | -1.559134 |
| 6 | -2.195512 | 0.638875  | -0.182708 |
| 1 | -3.280390 | 0.508926  | -0.137163 |
| 1 | -2.011907 | 1.674176  | -0.493883 |
| 6 | -1.569121 | 0.406632  | 1.197388  |
| 1 | -1.873757 | -0.571635 | 1.586187  |
| 1 | -1.930564 | 1.148419  | 1.916888  |
| 6 | -0.043033 | 0.507702  | 1.135976  |
| 1 | 0.258425  | 1.514811  | 0.843476  |
| 1 | 0.436100  | 0.269194  | 2.085817  |
| 8 | 2.186476  | 1.250192  | -0.455347 |
| 1 | 2.467421  | 1.742756  | 0.325282  |

#####

SP3-I-2-CH3 b3lyp/6-311g(2d,d,p) if=89.0821

|   |           |           |           |
|---|-----------|-----------|-----------|
| 7 | -0.541664 | -0.221133 | 0.056246  |
| 7 | -1.765033 | -0.490589 | -0.710376 |
| 6 | -0.727346 | -0.464656 | 1.526023  |
| 1 | -1.448625 | 0.256671  | 1.903751  |
| 1 | -1.138805 | -1.466795 | 1.623513  |
| 1 | 0.206262  | -0.369962 | 2.082791  |
| 6 | -2.837475 | 0.399098  | -0.326698 |
| 1 | -3.216635 | 0.316218  | 0.716492  |
| 1 | -3.676585 | 0.110889  | -0.966395 |
| 1 | -2.681608 | 1.485619  | -0.508398 |
| 6 | 1.476947  | 1.343741  | 0.249353  |
| 1 | 1.553150  | 1.319157  | 1.342356  |
| 1 | 1.818380  | 2.335862  | -0.059654 |
| 6 | 0.019764  | 1.169636  | -0.193797 |
| 1 | -0.639207 | 1.881402  | 0.303745  |
| 1 | -0.090515 | 1.298215  | -1.272199 |
| 6 | 1.874406  | -1.014483 | -0.051516 |

1 1.985402 -1.232014 1.016743  
1 2.507188 -1.735236 -0.575993  
6 0.429681 -1.223794 -0.508897  
1 0.320789 -1.106552 -1.587642  
1 0.032690 -2.204628 -0.247488  
7 2.387351 0.336395 -0.294805  
1 2.487684 0.481193 -1.295879

#####

SP3-I-2-CN b3lyp/6-311g(2d,d,p) if=82.4118

7 -0.295638 -0.341547 0.034672  
7 -1.493497 -0.735403 -0.741352  
6 -0.524969 -0.574273 1.498660  
1 -1.379329 0.030927 1.797368  
1 -0.767359 -1.627261 1.622745  
1 0.353978 -0.307848 2.084012  
6 1.491210 1.453575 0.243661  
1 1.531063 1.463121 1.338230  
1 1.720813 2.471854 -0.079501  
6 0.082626 1.101157 -0.246582  
1 -0.694662 1.722528 0.199476  
1 0.008452 1.191019 -1.331289  
6 2.181955 -0.849615 0.000736  
1 2.279121 -1.042809 1.074607  
1 2.913489 -1.493886 -0.492783  
6 0.788084 -1.243192 -0.497261  
1 0.706431 -1.155618 -1.580953  
1 0.504352 -2.259298 -0.223032  
7 2.528863 0.548536 -0.248405  
1 2.670582 0.695967 -1.243353  
6 -2.520245 0.005423 -0.367611  
7 -3.430999 0.664535 -0.038508

#####

SP3-I-2-COOH b3lyp/6-311g(2d,d,p) if=106.5777

7 0.057142 -0.287008 0.183861  
7 -1.196456 -0.794228 -0.378640  
6 -0.022066 -0.186539 1.683755  
1 -0.784759 0.551629 1.913863  
1 -0.322495 -1.166717 2.048139  
1 0.941366 0.097405 2.103692  
6 1.935323 1.394590 -0.162363  
1 2.072107 1.642028 0.895697  
1 2.175565 2.303248 -0.720444

6 0.475518 1.034493 -0.449380  
1 -0.234860 1.778723 -0.096667  
1 0.314140 0.878360 -1.517682  
6 2.510051 -0.936937 0.065687  
1 2.700083 -0.895516 1.143386  
1 3.163101 -1.719598 -0.328565  
6 1.061418 -1.342536 -0.218196  
1 0.887449 -1.492441 -1.283713  
1 0.765917 -2.257232 0.295738  
7 2.894544 0.348141 -0.517918  
1 2.942831 0.261249 -1.529119  
6 -2.228509 0.032110 -0.151107  
8 -2.285872 1.121386 0.440548  
8 -3.370211 -0.493833 -0.697963  
1 -4.048797 0.159031 -0.486507

#####

SP3-I-2-H b3lyp/6-311g(2d,d,p) if=166.4437

7 -0.927608 0.001394 -0.077847  
7 -2.096535 -0.111032 -0.921458  
6 -1.305587 0.010640 1.376417  
1 -1.904044 0.904725 1.545723  
1 -1.928079 -0.865946 1.534898  
1 -0.441474 0.011290 2.048936  
6 1.324624 1.207887 0.173567  
1 1.291554 1.319460 1.263376  
1 1.877732 2.070499 -0.208516  
6 -0.092440 1.226673 -0.415894  
1 -0.671236 2.091840 -0.084571  
1 -0.080472 1.227010 -1.506282  
6 1.291140 -1.206566 0.199726  
1 1.250913 -1.286439 1.292137  
1 1.827810 -2.091603 -0.151740  
6 -0.116672 -1.225198 -0.400334  
1 -0.095298 -1.241030 -1.490641  
1 -0.714855 -2.075592 -0.072252  
7 2.069081 -0.012325 -0.138774  
1 2.292106 -0.026092 -1.130232  
1 -2.625611 0.735006 -0.675176

#####

SP3-I-2-NH2 b3lyp/6-311g(2d,d,p) if=135.5356

7 -0.512677 -0.219290 0.065531  
7 -1.812039 -0.470526 -0.751060

|   |           |           |           |
|---|-----------|-----------|-----------|
| 6 | -0.767603 | -0.445857 | 1.511620  |
| 1 | -1.593560 | 0.210734  | 1.782730  |
| 1 | -1.074286 | -1.483434 | 1.630286  |
| 1 | 0.106654  | -0.232064 | 2.131593  |
| 6 | 1.474098  | 1.343264  | 0.260838  |
| 1 | 1.544157  | 1.319152  | 1.354076  |
| 1 | 1.821156  | 2.333124  | -0.048664 |
| 6 | 0.021739  | 1.160137  | -0.194969 |
| 1 | -0.668312 | 1.857634  | 0.281258  |
| 1 | -0.066863 | 1.280264  | -1.277020 |
| 6 | 1.870531  | -1.022148 | -0.045299 |
| 1 | 1.968665  | -1.241412 | 1.024018  |
| 1 | 2.510332  | -1.739261 | -0.566270 |
| 6 | 0.424597  | -1.227492 | -0.505603 |
| 1 | 0.320539  | -1.113887 | -1.586822 |
| 1 | 0.029334  | -2.208931 | -0.241688 |
| 7 | 2.385636  | 0.330658  | -0.278785 |
| 1 | 2.492229  | 0.478149  | -1.278878 |
| 7 | -2.758937 | 0.447441  | -0.250810 |
| 1 | -3.061542 | 1.104640  | -0.967129 |
| 1 | -3.582549 | -0.030112 | 0.108856  |

#####

SP3-l-2-NO2 b3lyp/6-311g(2d,d,p) if=102.4057

|   |           |           |           |
|---|-----------|-----------|-----------|
| 7 | 0.022331  | -0.264453 | 0.188880  |
| 7 | -1.231063 | -0.796480 | -0.416856 |
| 6 | -0.066227 | -0.206002 | 1.689665  |
| 1 | -0.814387 | 0.536177  | 1.946076  |
| 1 | -0.382084 | -1.191560 | 2.025615  |
| 1 | 0.902649  | 0.047774  | 2.115229  |
| 6 | 1.926398  | 1.385762  | -0.135662 |
| 1 | 2.063168  | 1.615960  | 0.926263  |
| 1 | 2.179960  | 2.298882  | -0.679835 |
| 6 | 0.459656  | 1.057447  | -0.429770 |
| 1 | -0.230345 | 1.814196  | -0.068474 |
| 1 | 0.296102  | 0.919206  | -1.500258 |
| 6 | 2.463828  | -0.955124 | 0.059413  |
| 1 | 2.652499  | -0.934746 | 1.137747  |
| 1 | 3.102405  | -1.743506 | -0.346510 |
| 6 | 1.009733  | -1.334236 | -0.233209 |
| 1 | 0.839397  | -1.463644 | -1.301941 |
| 1 | 0.701658  | -2.252395 | 0.266376  |
| 7 | 2.868795  | 0.330797  | -0.503937 |
| 1 | 2.927581  | 0.260073  | -1.515614 |

7 -2.298117 0.008985 -0.207725  
8 -3.343873 -0.408639 -0.694678  
8 -2.222697 1.090459 0.428449

#####

SP3-I-2-OH b3lyp/6-311g(2d,d,p) if=134.3020

7 -0.536924 -0.226810 0.044301  
7 -1.774640 -0.485895 -0.782963  
6 -0.809141 -0.423653 1.497868  
1 -1.619161 0.254803 1.757750  
1 -1.136762 -1.453190 1.628787  
1 0.063710 -0.215732 2.120348  
6 1.444956 1.349877 0.247565  
1 1.495588 1.347854 1.342322  
1 1.795009 2.334443 -0.074186  
6 0.004563 1.157602 -0.234545  
1 -0.699583 1.860741 0.208398  
1 -0.069847 1.249651 -1.319307  
6 1.857674 -1.018303 0.000709  
1 1.938072 -1.213419 1.076184  
1 2.508328 -1.745196 -0.492224  
6 0.421880 -1.247315 -0.480986  
1 0.337717 -1.161136 -1.566410  
1 0.030511 -2.224046 -0.194605  
7 2.369392 0.329809 -0.254498  
1 2.496536 0.456854 -1.254846  
8 -2.713231 0.529901 -0.331891  
1 -3.358656 0.040183 0.191371

#####

SP3-I-3-CH3 b3lyp/6-311g(2d,d,p) if=53.3019

7 -0.559548 0.417053 -0.004108  
6 0.120554 -0.174753 1.242732  
1 -0.220935 -1.208101 1.281975  
1 -0.296040 0.365845 2.090674  
6 2.112207 -0.729287 0.007557  
1 1.899111 -1.803387 0.022136  
1 3.195099 -0.602343 0.004170  
6 0.116600 -0.209637 -1.235525  
1 -0.303559 0.305661 -2.097434  
1 -0.223001 -1.244362 -1.243934  
6 -2.440536 -1.109956 0.012225  
1 -2.170568 -1.723377 0.899411  
1 -3.532859 -1.053509 0.021253

1 -2.185623 -1.731751 -0.873477  
6 -0.371738 1.888763 -0.025178  
1 -0.873842 2.259236 -0.916053  
1 -0.884587 2.284321 0.848630  
1 0.684542 2.161632 -0.022701  
7 1.562151 -0.152346 1.234208  
1 1.924628 0.780541 1.397359  
7 1.558095 -0.185274 -1.232298  
1 1.919037 0.743464 -1.420495  
7 -2.011259 0.274188 0.001858

#####

SP3-I-3-CN b3lyp/6-311g(2d,d,p) if=94.4150

7 -0.280323 0.658246 0.000015  
6 0.223720 -0.110391 1.247949  
1 -0.368347 -1.026605 1.247992  
1 -0.057888 0.498157 2.105380  
6 2.029991 -1.093863 -0.000038  
1 1.571047 -2.087134 -0.000146  
1 3.112195 -1.220550 -0.000001  
6 0.223829 -0.110172 -1.248008  
1 -0.057704 0.498525 -2.105358  
1 -0.368232 -1.026389 -1.248268  
6 0.218703 2.054244 0.000160  
1 -0.178468 2.546705 -0.884903  
1 -0.178545 2.546551 0.885274  
1 1.307937 2.072715 0.000210  
7 1.620684 -0.415352 1.229389  
1 2.201564 0.388601 1.437324  
7 1.620793 -0.415136 -1.229382  
1 2.201689 0.388855 -1.437123  
7 -1.735352 0.792922 -0.000021  
6 -2.311035 -0.396180 -0.000049  
7 -2.868159 -1.426574 -0.000068

#####

SP3-I-3-COOH b3lyp/6-311g(2d,d,p) if=103.9872

7 -0.068448 0.677992 0.000021  
6 -0.580248 -0.087461 -1.255051  
1 -0.001225 -1.008006 -1.245346  
1 -0.299370 0.528879 -2.107455  
6 -2.393166 -1.048852 -0.000001  
1 -1.934261 -2.041550 -0.000043  
1 -3.476142 -1.172634 -0.000013

|   |           |           |           |
|---|-----------|-----------|-----------|
| 6 | -0.580154 | -0.087694 | 1.254928  |
| 1 | -0.299064 | 0.528410  | 2.107434  |
| 1 | -0.001238 | -1.008299 | 1.244961  |
| 6 | -0.595527 | 2.067554  | 0.000109  |
| 1 | -0.208251 | 2.568490  | 0.884557  |
| 1 | -0.206864 | 2.568940  | -0.883465 |
| 1 | -1.684681 | 2.067255  | -0.000668 |
| 7 | -1.983888 | -0.369684 | -1.229771 |
| 1 | -2.553064 | 0.447935  | -1.417312 |
| 7 | -1.983841 | -0.369804 | 1.229797  |
| 1 | -2.552937 | 0.447864  | 1.417363  |
| 7 | 1.371204  | 0.863698  | 0.000076  |
| 6 | 2.057697  | -0.288976 | 0.000010  |
| 8 | 1.674738  | -1.470953 | -0.000060 |
| 8 | 3.401681  | -0.025281 | -0.000033 |
| 1 | 3.808940  | -0.900245 | -0.000112 |

#####

SP3-I-3-H b3lyp/6-311g(2d,d,p) if=177.3448

|   |           |           |           |
|---|-----------|-----------|-----------|
| 7 | 0.922526  | 0.000011  | -0.067140 |
| 6 | 0.061739  | 1.233687  | -0.403967 |
| 1 | 0.023071  | 1.224064  | -1.495092 |
| 1 | 0.644577  | 2.095752  | -0.084679 |
| 6 | -1.993529 | -0.000089 | -0.177542 |
| 1 | -2.195530 | -0.000184 | -1.254145 |
| 1 | -2.951536 | -0.000104 | 0.342857  |
| 6 | 0.061857  | -1.233628 | -0.403944 |
| 1 | 0.644776  | -2.095692 | -0.084795 |
| 1 | 0.022987  | -1.223987 | -1.495064 |
| 6 | 1.278043  | 0.000071  | 1.373436  |
| 1 | 1.887229  | -0.883774 | 1.549790  |
| 1 | 1.888488  | 0.883162  | 1.549197  |
| 1 | 0.391261  | 0.000877  | 2.009694  |
| 7 | -1.273678 | 1.234825  | 0.134548  |
| 1 | -1.281847 | 1.433650  | 1.128727  |
| 7 | -1.273539 | -1.234896 | 0.134704  |
| 1 | -1.281512 | -1.433428 | 1.128950  |
| 7 | 2.176785  | 0.000038  | -0.756269 |
| 1 | 1.894720  | -0.000427 | -1.744229 |

#####

SP3-I-3-NH2 b3lyp/6-311g(2d,d,p) if=131.1048

|   |           |           |           |
|---|-----------|-----------|-----------|
| 7 | -0.552415 | 0.431000  | -0.000178 |
| 6 | 0.109233  | -0.172576 | 1.232807  |

1 -0.248657 -1.202253 1.235216  
1 -0.304559 0.356537 2.090059  
6 2.104058 -0.716011 0.000341  
1 1.885570 -1.788620 0.001021  
1 3.187627 -0.591883 0.000186  
6 0.109059 -0.174086 -1.232520  
1 -0.304846 0.353985 -2.090357  
1 -0.248867 -1.203755 -1.233618  
6 -0.456416 1.902293 -0.001077  
1 -0.980810 2.261822 -0.884515  
1 -0.980637 2.262885 0.882029  
1 0.582787 2.234100 -0.001380  
7 1.553760 -0.152469 1.233537  
1 1.913812 0.781916 1.398388  
7 1.553589 -0.154000 -1.233477  
1 1.913638 0.780170 -1.399553  
7 -2.050857 0.197509 0.000044  
7 -2.230301 -1.218595 0.000641  
1 -2.763762 -1.503028 0.819550  
1 -2.763334 -1.503704 -0.818307

#####

SP3-I-3-NO2 b3lyp/6-311g(2d,d,p) if=103.3115

7 -0.024676 0.646668 -0.000113  
6 -0.561419 -0.092559 -1.265986  
1 -0.009206 -1.027434 -1.275217  
1 -0.271594 0.529200 -2.111325  
6 -2.394676 -1.003364 0.000217  
1 -1.958975 -2.006454 0.000311  
1 -3.479916 -1.102238 0.000254  
6 -0.561255 -0.092374 1.265867  
1 -0.271134 0.529440 2.111055  
1 -0.009152 -1.027321 1.275057  
6 -0.501968 2.056316 -0.000254  
1 -0.103972 2.547284 0.884954  
1 -0.102591 2.547411 -0.884764  
1 -1.589703 2.084179 -0.001045  
7 -1.970472 -0.331978 -1.228571  
1 -2.519361 0.498955 -1.416973  
7 -1.970352 -0.331727 1.228824  
1 -2.519123 0.499349 1.416982  
7 1.437620 0.843494 0.000187  
7 2.142385 -0.313223 -0.000004  
8 1.597756 -1.449032 -0.000211



8 3.358381 -0.160110 0.000136  
#####  
SP3-I-3-OH b3lyp/6-311g(2d,d,p) if=140.1849

7 -0.585636 0.417857 0.032518  
6 0.088589 -0.277632 1.216378  
1 -0.243009 -1.311352 1.126651  
1 -0.341700 0.165206 2.113760  
6 2.096349 -0.674481 -0.048577  
1 1.895857 -1.746574 -0.142001  
1 3.177433 -0.533456 -0.029007  
6 0.102609 -0.062552 -1.253141  
1 -0.316436 0.539737 -2.056908  
1 -0.244640 -1.088914 -1.358673  
6 -0.520003 1.887362 0.160545  
1 -1.102698 2.304249 -0.659336  
1 -0.990490 2.164769 1.102152  
1 0.511441 2.238277 0.124508  
7 1.529368 -0.228407 1.225573  
1 1.870298 0.694530 1.473454  
7 1.543076 -0.014831 -1.229986  
1 1.891673 0.933586 -1.319296  
7 -2.052163 0.159078 -0.028571  
8 -2.155527 -1.292757 -0.185326  
1 -2.511302 -1.590067 0.659337

#####  
SP3-I-4-CH3 b3lyp/6-311g(2d,d,p) if=68.0721

7 -0.650970 -0.409375 -0.001623  
6 -2.357849 1.188523 0.004996  
1 -2.017389 1.744668 -0.879272  
1 -3.449993 1.199157 0.009656  
1 -2.009682 1.740322 0.888916  
6 -0.429427 -1.892567 -0.007865  
1 -0.921809 -2.289816 0.875909  
1 -0.920272 -2.282401 -0.895824  
1 0.629918 -2.136877 -0.008023  
7 -1.970867 -0.218266 0.000142  
7 0.091122 0.262561 -1.197212  
1 -0.341710 -0.198628 -1.996315  
6 1.555865 0.116159 -1.182563  
1 1.905904 -0.925904 -1.229503  
1 1.926587 0.624997 -2.077419  
1 -0.338946 -0.217255 1.995153

7 2.131297 0.720900 0.002162  
1 1.886900 1.708547 0.006553  
1 1.908144 -0.936456 1.219963  
7 0.093016 0.251948 1.200320  
6 1.557656 0.105928 1.182505  
1 1.929693 0.607009 2.081235

#####

SP3-I-4-CN b3lyp/6-311g(2d,d,p) if=84.1465

7 0.286097 0.618110 0.000002  
6 -0.224791 2.035476 0.000005  
1 0.178888 2.517563 0.886309  
1 0.178892 2.517569 -0.886294  
1 -1.310989 2.052818 0.000003  
7 1.685340 0.757955 -0.000001  
7 -0.189180 -0.163920 -1.167390  
1 0.168622 0.345516 -1.972460  
6 -1.647921 -0.386670 -1.182989  
1 -2.238821 0.537603 -1.251011  
1 -1.849509 -0.978033 -2.078000  
1 0.168631 0.345499 1.972461  
7 -2.068153 -1.107210 -0.000001  
1 -1.620749 -2.020778 -0.000005  
1 -2.238817 0.537595 1.251020  
7 -0.189176 -0.163925 1.167386  
6 -1.647916 -0.386678 1.182989  
1 -1.849501 -0.978046 2.077998  
6 2.316160 -0.416434 -0.000001  
7 2.995095 -1.362649 -0.000004

#####

SP3-I-4-COOH b3lyp/6-311g(2d,d,p) if=82.2563

7 0.062085 0.664108 -0.000207  
6 0.587979 2.078704 -0.000615  
1 0.188224 2.566058 -0.885703  
1 0.188111 2.566621 0.884092  
1 1.674999 2.084013 -0.000617  
7 -1.332244 0.832768 0.000167  
7 0.541633 -0.096659 1.179437  
1 0.209732 0.445339 1.973316  
6 1.991007 -0.354848 1.179831  
1 2.613627 0.550873 1.226782  
1 2.187172 -0.940673 2.080111  
1 0.209917 0.444351 -1.973682

7 2.375685 -1.101736 0.000324  
1 1.863677 -1.981662 0.000656  
1 2.613510 0.549972 -1.227247  
7 0.541421 -0.097303 -1.179390  
6 1.990954 -0.355719 -1.179614  
1 2.186883 -0.942170 -2.079529  
6 -2.039654 -0.337758 0.000058  
8 -1.700887 -1.507343 -0.000042  
8 -3.375857 -0.002164 0.000208  
1 -3.823678 -0.857183 0.000218

#####

SP3-I-4-H b3lyp/6-311g(2d,d,p) if=167.2976

7 0.963635 0.000033 -0.115932  
6 1.293959 -0.000377 1.348266  
1 1.895317 -0.886380 1.534197  
1 1.894859 0.885806 1.534874  
1 0.398326 -0.000826 1.964626  
7 2.127115 -0.000099 -0.781280  
7 0.050302 1.180908 -0.491072  
1 0.633244 1.983285 -0.256779  
6 -1.258380 1.186488 0.188674  
1 -1.194651 1.245868 1.285017  
1 -1.785778 2.079600 -0.157130  
1 0.632559 -1.983411 -0.256902  
7 -2.022630 0.000328 -0.149835  
1 -2.177016 0.000472 -1.155392  
1 -1.195276 -1.245971 1.284740  
7 0.049704 -1.181014 -0.491374  
6 -1.258918 -1.186292 0.188404  
1 -1.786776 -2.079061 -0.157614  
1 1.848336 0.000612 -1.765239

#####

SP3-I-4-NH2 b3lyp/6-311g(2d,d,p) if=123.2795

7 0.609168 0.375964 -0.000127  
6 0.447521 1.868975 -0.000681  
1 0.952149 2.245915 0.884556  
1 0.951906 2.245280 -0.886329  
1 -0.603143 2.145897 -0.000646  
7 1.989258 0.193834 -0.000078  
7 -0.090162 -0.259612 -1.179480  
1 0.368542 0.177300 -1.976240  
6 -1.554567 -0.103328 -1.181174

1 -1.900364 0.940523 -1.227808  
1 -1.916695 -0.610038 -2.079582  
1 0.368447 0.178768 1.976160  
7 -2.138277 -0.709151 0.000232  
1 -1.891092 -1.696512 0.000618  
1 -1.900460 0.941462 1.227030  
7 -0.090245 -0.258715 1.179710  
6 -1.554636 -0.102420 1.181210  
1 -1.916815 -0.608451 2.079982  
7 2.262211 -1.213776 0.000500  
1 2.831697 -1.420104 -0.815189  
1 2.832250 -1.419213 0.816012

#####

SP3-I-4-NO2 b3lyp/6-311g(2d,d,p) if=82.7284

7 0.029425 0.650034 -0.000043  
6 0.503966 2.084720 -0.000210  
1 0.093704 2.561854 -0.886144  
1 0.093664 2.562137 0.885557  
1 1.589808 2.115546 -0.000173  
7 -1.399560 0.830430 0.000093  
7 0.508302 -0.087944 1.180589  
1 0.172855 0.455532 1.971848  
6 1.962398 -0.332237 1.179214  
1 2.572171 0.581921 1.225615  
1 2.163718 -0.915016 2.079802  
1 0.171676 0.454137 -1.971913  
7 2.354196 -1.072458 -0.000071  
1 1.866259 -1.965491 0.000159  
1 2.571886 0.581472 -1.226425  
7 0.508062 -0.088213 -1.180319  
6 1.961935 -0.332571 -1.179498  
1 2.162957 -0.915652 -2.079959  
7 -2.111022 -0.363106 0.000123  
8 -1.582541 -1.471922 0.000471  
8 -3.324248 -0.167718 -0.000220

#####

SP3-I-4-OH b3lyp/6-311g(2d,d,p) if=120.2717

7 0.640226 0.363317 -0.035791  
6 0.529524 1.851267 -0.201862  
1 1.149962 2.297194 0.570858  
1 0.931039 2.104283 -1.179651  
1 -0.503531 2.174092 -0.111090

7 2.010091 0.141329 0.043493  
7 -0.041999 -0.399385 -1.116492  
1 0.478578 -0.157399 -1.955736  
6 -1.492124 -0.183415 -1.190263  
1 -1.791109 0.863202 -1.351840  
1 -1.844892 -0.762678 -2.046814  
1 0.315185 0.454995 1.953422  
7 -2.138172 -0.646257 0.023994  
1 -1.941488 -1.639254 0.126338  
1 -1.895614 1.101742 1.104442  
7 -0.108604 -0.120473 1.226392  
6 -1.575996 0.050664 1.162455  
1 -1.978831 -0.363441 2.090781  
8 2.216275 -1.274177 0.030932  
1 2.051287 -1.560138 0.938686

#####

SP3-I-5-CN b3lyp/6-311g(2d,d,p) if=90.1735

7 0.237104 0.817279 0.094091  
6 -0.110779 2.220723 0.434736  
1 0.346448 2.461857 1.393144  
1 0.318755 2.855058 -0.337195  
1 -1.193993 2.340703 0.492957  
7 -1.871060 -0.008486 -0.814452  
1 -2.301836 0.686532 -0.194231  
7 1.617392 0.816095 -0.192889  
7 -0.563945 0.317516 -1.131047  
1 -0.521808 1.073537 -1.809594  
6 -0.236156 -0.174147 1.246124  
1 -1.004952 0.358329 1.808817  
1 0.652041 -0.318683 1.856467  
7 -0.715658 -1.408419 0.746947  
1 0.022750 -1.923670 0.277412  
7 -1.824133 -1.310036 -0.157360  
1 -2.682163 -1.371602 0.386049  
6 2.082477 -0.422873 -0.268289  
7 2.541943 -1.495990 -0.309468

#####

SP3-I-5-COOH b3lyp/6-311g(2d,d,p) if=98.8116

7 -0.102788 0.808843 0.170123  
6 -0.521207 2.190813 0.539641  
1 -0.131778 2.403791 1.533746  
1 -0.064955 2.870011 -0.175806

1 -1.609275 2.277813 0.538715  
7 -2.124815 0.093377 -0.966684  
1 -2.582417 0.800544 -0.381015  
7 1.291793 0.906278 -0.022243  
7 -0.774352 0.359488 -1.131538  
1 -0.627036 1.126381 -1.782644  
6 -0.694779 -0.224222 1.246864  
1 -1.471097 0.332603 1.774291  
1 0.138356 -0.447243 1.905032  
7 -1.200308 -1.408108 0.660290  
1 -0.419730 -1.890911 0.218959  
7 -2.219605 -1.219872 -0.327026  
1 -3.123117 -1.222913 0.141317  
6 1.920085 -0.284305 -0.088716  
8 1.504722 -1.433720 0.092481  
8 3.239859 -0.085223 -0.375865  
1 3.620335 -0.972297 -0.372734

#####

SP3-I-5-NO2 b3lyp/6-311g(2d,d,p) if=92.7407

7 0.039942 0.774252 -0.179352  
6 0.397053 2.176443 -0.547840  
1 0.013380 2.370754 -1.547693  
1 -0.090710 2.840944 0.160685  
1 1.479726 2.305424 -0.533255  
7 2.067562 0.173903 0.988464  
1 2.496134 0.921252 0.432379  
7 -1.379695 0.870018 -0.002723  
7 0.700744 0.351860 1.127499  
1 0.492218 1.097479 1.786680  
6 0.686245 -0.232167 -1.256475  
1 1.421817 0.375434 -1.785493  
1 -0.131544 -0.512226 -1.911299  
7 1.276941 -1.371766 -0.666171  
1 0.545217 -1.923258 -0.230000  
7 2.269766 -1.117359 0.331600  
1 3.176319 -1.048231 -0.125169  
7 -1.998221 -0.339600 0.118617  
8 -3.185678 -0.264270 0.402003  
8 -1.407025 -1.421027 -0.082812

#####

SP3-I-6-CN b3lyp/6-311g(2d,d,p) if=66.8292

7 -0.941730 -0.249771 0.000212

6 -2.422567 -0.323731 -0.000320  
1 -2.708460 -0.867609 -0.895974  
1 -2.709114 -0.868540 0.894554  
1 -2.845219 0.682504 -0.000003  
7 -0.473314 -1.551485 0.000248  
7 -0.533788 0.560681 1.261265  
1 -1.121230 1.395643 1.215275  
7 -0.533321 0.560593 -1.261404  
1 -1.120692 1.395632 -1.215412  
7 1.219805 1.615723 0.000000  
1 0.907854 2.581804 -0.000251  
7 0.797324 0.994890 1.201387  
1 1.409517 0.210460 1.402330  
7 0.797595 0.994461 -1.201383  
1 1.409870 0.209991 -1.401916  
6 0.840698 -1.676290 0.000182  
7 1.991528 -1.887915 -0.000008

#####

SP3-I-6-COOH b3lyp/6-311g(2d,d,p) if=84.3179

7 0.164674 0.701066 -0.147312  
6 -0.356147 2.099974 -0.135568  
1 -0.640257 2.328178 -1.160068  
1 -1.211388 2.111923 0.532608  
1 0.439331 2.769813 0.199676  
7 -0.661468 -0.319560 -0.631098  
7 0.652357 0.364423 1.277595  
1 1.330719 1.093942 1.503647  
7 1.342694 0.685563 -1.083138  
1 1.986154 1.378723 -0.698706  
7 2.314870 -1.047381 0.257684  
1 3.173666 -0.600199 0.562301  
7 1.329712 -0.862183 1.271507  
1 0.628818 -1.587569 1.165210  
7 1.992883 -0.561681 -1.041739  
1 1.346821 -1.217232 -1.472172  
6 -1.894597 -0.345801 -0.068483  
8 -2.431975 0.405245 0.739951  
8 -2.574652 -1.425191 -0.562507  
1 -3.446437 -1.364774 -0.152226

#####

SP3-I-6-NO2 b3lyp/6-311g(2d,d,p) if=100.1433

7 0.088426 0.923438 0.000254

|   |           |           |           |
|---|-----------|-----------|-----------|
| 6 | 0.264216  | 2.407252  | -0.000565 |
| 1 | -0.225744 | 2.785744  | -0.892750 |
| 1 | -0.226043 | 2.786755  | 0.891007  |
| 1 | 1.328946  | 2.647703  | -0.000479 |
| 7 | -1.344095 | 0.824977  | 0.000322  |
| 7 | 0.789276  | 0.421460  | 1.272943  |
| 1 | 1.563006  | 1.075531  | 1.377046  |
| 7 | 0.789770  | 0.420228  | -1.273414 |
| 1 | 1.563600  | 1.074365  | -1.376924 |
| 7 | 2.049441  | -1.183048 | 0.000232  |
| 1 | 2.956902  | -0.727770 | -0.000084 |
| 7 | 1.358828  | -0.863335 | 1.196047  |
| 1 | 0.592390  | -1.522473 | 1.283847  |
| 7 | 1.358497  | -0.864045 | -1.195922 |
| 1 | 0.592163  | -1.523253 | -1.283247 |
| 7 | -1.813990 | -0.436829 | 0.000098  |
| 8 | -1.051326 | -1.439597 | 0.000549  |
| 8 | -3.031622 | -0.527908 | -0.000416 |

#####

SP3-II-1-CH3 b3lyp/6-311g(2d,d,p) if=103.3505

|   |           |           |           |
|---|-----------|-----------|-----------|
| 7 | 0.710190  | 0.000002  | -0.077632 |
| 6 | 1.036792  | -0.000029 | 1.379397  |
| 1 | 1.641908  | -0.884181 | 1.562038  |
| 1 | 1.641920  | 0.884108  | 1.562071  |
| 1 | 0.135239  | -0.000033 | 1.994392  |
| 7 | 1.980085  | 0.000018  | -0.727665 |
| 6 | -0.207937 | 1.180732  | -0.394122 |
| 1 | -0.135673 | 1.296653  | -1.475334 |
| 1 | 0.208136  | 2.069706  | 0.075373  |
| 6 | -1.617889 | 0.781673  | 0.053479  |
| 1 | -2.372138 | 1.187243  | -0.622828 |
| 1 | -1.843603 | 1.167992  | 1.049372  |
| 6 | -1.617877 | -0.781683 | 0.053472  |
| 1 | -2.372145 | -1.187264 | -0.622806 |
| 1 | -1.843543 | -1.168013 | 1.049372  |
| 6 | -0.207933 | -1.180710 | -0.394177 |
| 1 | 0.208150  | -2.069713 | 0.075254  |
| 1 | -0.135691 | -1.296565 | -1.475399 |
| 1 | 1.724580  | 0.000031  | -1.722719 |

#####

SP3-II-1-CN b3lyp/6-311g(2d,d,p) if=83.4297

|   |          |          |          |
|---|----------|----------|----------|
| 7 | 0.000190 | 0.576078 | 0.000001 |
|---|----------|----------|----------|



|   |           |           |           |
|---|-----------|-----------|-----------|
| 6 | 0.694945  | 1.895565  | 0.000005  |
| 1 | 0.367463  | 2.434001  | -0.885822 |
| 1 | 0.367457  | 2.433999  | 0.885830  |
| 1 | 1.775729  | 1.757342  | 0.000008  |
| 7 | -1.423328 | 0.927393  | 0.000000  |
| 6 | 0.442959  | -0.265014 | 1.186534  |
| 1 | -0.337698 | -1.015409 | 1.312319  |
| 1 | 0.468610  | 0.371782  | 2.068432  |
| 6 | 1.781679  | -0.889773 | 0.779865  |
| 1 | 1.867872  | -1.898122 | 1.185977  |
| 1 | 2.625232  | -0.315649 | 1.167309  |
| 6 | 1.781685  | -0.889760 | -0.779868 |
| 1 | 1.867893  | -1.898101 | -1.185998 |
| 1 | 2.625233  | -0.315619 | -1.167296 |
| 6 | 0.442961  | -0.265009 | -1.186534 |
| 1 | 0.468606  | 0.371788  | -2.068431 |
| 1 | -0.337692 | -1.015409 | -1.312319 |
| 6 | -2.151033 | -0.171373 | -0.000001 |
| 7 | -2.822274 | -1.131815 | -0.000003 |

#####

SP3-II-1-COOH b3lyp/6-311g(2d,d,p) if=82.7426

|   |           |           |           |
|---|-----------|-----------|-----------|
| 7 | 0.328418  | 0.581693  | -0.000309 |
| 6 | 0.971287  | 1.931043  | -0.001117 |
| 1 | 0.622765  | 2.457340  | -0.885969 |
| 1 | 0.623890  | 2.457982  | 0.883793  |
| 1 | 2.056844  | 1.835187  | -0.001820 |
| 7 | -1.091273 | 0.893688  | -0.000041 |
| 6 | 0.828566  | -0.224682 | 1.193358  |
| 1 | 0.106014  | -1.027104 | 1.313115  |
| 1 | 0.822908  | 0.425977  | 2.065857  |
| 6 | 2.206224  | -0.756254 | 0.780083  |
| 1 | 2.359223  | -1.757163 | 1.185305  |
| 1 | 3.012488  | -0.128642 | 1.164954  |
| 6 | 2.205258  | -0.759237 | -0.779204 |
| 1 | 2.354750  | -1.762266 | -1.180467 |
| 1 | 3.012896  | -0.135577 | -1.167533 |
| 6 | 0.828378  | -0.225767 | -1.193337 |
| 1 | 0.824267  | 0.424619  | -2.066051 |
| 1 | 0.104942  | -1.027311 | -1.313493 |
| 6 | -1.862096 | -0.201431 | 0.000204  |
| 8 | -1.562628 | -1.407223 | 0.000351  |
| 8 | -3.184074 | 0.158720  | 0.000168  |
| 1 | -3.653089 | -0.684725 | 0.000675  |

#####

SP3-II-1-H b3lyp/6-311g(2d,d,p) if=103.3505

|   |           |           |           |
|---|-----------|-----------|-----------|
| 7 | 0.710190  | 0.000002  | -0.077632 |
| 6 | 1.036792  | -0.000029 | 1.379397  |
| 1 | 1.641908  | -0.884181 | 1.562038  |
| 1 | 1.641920  | 0.884108  | 1.562071  |
| 1 | 0.135239  | -0.000033 | 1.994392  |
| 7 | 1.980085  | 0.000018  | -0.727665 |
| 6 | -0.207937 | 1.180732  | -0.394122 |
| 1 | -0.135673 | 1.296653  | -1.475334 |
| 1 | 0.208136  | 2.069706  | 0.075373  |
| 6 | -1.617889 | 0.781673  | 0.053479  |
| 1 | -2.372138 | 1.187243  | -0.622828 |
| 1 | -1.843603 | 1.167992  | 1.049372  |
| 6 | -1.617877 | -0.781683 | 0.053472  |
| 1 | -2.372145 | -1.187264 | -0.622806 |
| 1 | -1.843543 | -1.168013 | 1.049372  |
| 6 | -0.207933 | -1.180710 | -0.394177 |
| 1 | 0.208150  | -2.069713 | 0.075254  |
| 1 | -0.135691 | -1.296565 | -1.475399 |
| 1 | 1.724580  | 0.000031  | -1.722719 |

#####

SP3-II-1-NH2 b3lyp/6-311g(2d,d,p) if=92.8233

|   |           |           |           |
|---|-----------|-----------|-----------|
| 7 | 0.302752  | 0.409126  | -0.000011 |
| 6 | 0.049877  | 1.868096  | -0.000618 |
| 1 | 0.534032  | 2.277536  | 0.883197  |
| 1 | 0.534363  | 2.276872  | -0.884561 |
| 1 | -1.019490 | 2.083432  | -0.000903 |
| 7 | 1.815535  | 0.340351  | 0.000192  |
| 6 | -0.358050 | -0.265451 | -1.176653 |
| 1 | 0.188560  | -1.202419 | -1.286633 |
| 1 | -0.206158 | 0.349717  | -2.061894 |
| 6 | -1.821278 | -0.502464 | -0.779915 |
| 1 | -2.187611 | -1.446557 | -1.187654 |
| 1 | -2.472287 | 0.285190  | -1.165489 |
| 6 | -1.821523 | -0.501864 | 0.779925  |
| 1 | -2.187958 | -1.445656 | 1.188268  |
| 1 | -2.472686 | 0.286062  | 1.164680  |
| 6 | -0.358422 | -0.264515 | 1.176955  |
| 1 | -0.206833 | 0.351386  | 2.061739  |
| 1 | 0.188185  | -1.201373 | 1.287863  |
| 7 | 2.136494  | -1.042858 | 0.000194  |

1 2.690565 -1.281634 -0.820039  
1 2.690231 -1.281698 0.820634

#####

SP3-II-1-NO2 b3lyp/6-311g(2d,d,p) if=42.0441

7 -0.284327 0.567360 -0.000414  
6 -0.874735 1.943235 -0.001064  
1 -0.514793 2.459488 0.885065  
1 -0.513659 2.458921 -0.887056  
1 -1.961667 1.877079 -0.001743  
7 1.159018 0.881905 -0.000618  
6 -0.806750 -0.209095 -1.204266  
1 -0.097963 -1.014830 -1.363537  
1 -0.813903 0.464798 -2.058753  
6 -2.184562 -0.733619 -0.778765  
1 -2.341739 -1.735771 -1.178490  
1 -2.988717 -0.105139 -1.165806  
6 -2.185418 -0.730252 0.779924  
1 -2.346291 -1.730054 1.184040  
1 -2.987973 -0.097457 1.163304  
6 -0.806609 -0.207863 1.204234  
1 -0.811915 0.466301 2.058521  
1 -0.098859 -1.014595 1.362974  
7 1.940805 -0.220609 0.000127  
8 1.469983 -1.388563 0.000373  
8 3.144699 0.013092 0.000556

#####

SP3-II-1-OH b3lyp/6-311g(2d,d,p) if=87.3949

7 0.339358 0.404929 -0.005588  
6 0.116913 1.871589 -0.036853  
1 0.641801 2.288026 0.820258  
1 0.568673 2.254109 -0.949473  
1 -0.947397 2.104050 0.001393  
7 1.818931 0.302785 0.032509  
6 -0.338259 -0.276101 -1.177380  
1 0.180961 -1.229196 -1.270427  
1 -0.168101 0.319715 -2.072279  
6 -1.804969 -0.467860 -0.779789  
1 -2.201873 -1.399448 -1.187038  
1 -2.429106 0.340164 -1.167306  
6 -1.807614 -0.466159 0.780937  
1 -2.172783 -1.411721 1.185058  
1 -2.464347 0.318027 1.163194

6 -0.348265 -0.228894 1.190136  
1 -0.202606 0.421525 2.050146  
1 0.196392 -1.157761 1.348144  
8 2.070313 -1.130982 0.099882  
1 2.421025 -1.349077 -0.771485

#####

SP3-II-2-CH3 b3lyp/6-311g(2d,d,p) if=74.7850

7 -0.420788 -0.495483 -0.005532  
6 -0.850849 -1.910041 -0.172434  
1 -1.491966 -2.146877 0.672543  
1 -1.438058 -1.966314 -1.086203  
1 0.016605 -2.572175 -0.216313  
7 -1.667979 0.225970 0.157275  
6 0.459442 -0.067085 -1.225287  
1 -0.195722 0.437602 -1.929670  
1 0.865773 -0.980908 -1.667930  
6 0.562450 -0.358385 1.176978  
1 0.639980 -1.317732 1.685697  
1 0.110867 0.366178 1.849324  
7 1.516758 0.755906 -0.721033  
1 1.170496 1.695963 -0.560462  
1 2.566362 -0.697420 0.369643  
6 1.882070 0.135734 0.563149  
1 2.399230 0.853032 1.202056  
6 -1.445992 1.645909 0.174183  
1 -1.087304 2.114012 -0.773799  
1 -2.424207 2.095306 0.365572  
1 -0.770709 2.037789 0.975041

#####

SP3-II-2-CN b3lyp/6-311g(2d,d,p) if=55.6476

7 0.727671 -0.407284 0.018317  
6 2.049904 -1.081792 0.093132  
1 2.047542 -1.731107 0.965191  
1 2.156920 -1.690415 -0.802034  
1 2.842468 -0.336017 0.159315  
7 -0.235573 -1.505089 -0.144356  
6 0.653497 0.594979 -1.170340  
1 0.442395 0.018507 -2.066674  
1 1.634971 1.079261 -1.230488  
6 0.458271 0.497785 1.215246  
1 1.407633 0.712854 1.705314  
1 -0.188688 -0.053526 1.892225

7 -0.364977 1.524522 -0.824405  
1 -1.281026 1.120758 -0.997119  
1 0.446696 2.639935 0.771911  
6 -0.200288 1.772018 0.616114  
1 -1.169847 1.974231 1.068257  
6 -1.473241 -1.077929 -0.009845  
7 -2.593968 -0.749982 0.103053

#####

SP3-II-2-COOH b3lyp/6-311g(2d,d,p) if=95.3844

7 0.428598 -0.733473 -0.020238  
6 1.008871 -2.102331 -0.136969  
1 0.609270 -2.702156 0.676331  
1 0.679530 -2.523604 -1.084547  
1 2.097516 -2.047394 -0.092898  
7 -1.005090 -0.977860 0.017161  
6 0.951826 0.161192 -1.222460  
1 0.120171 0.312636 -1.901807  
1 1.743344 -0.424993 -1.694140  
6 0.994180 -0.016541 1.207365  
1 1.396975 -0.759642 1.893645  
1 0.166905 0.514561 1.665926  
7 1.458168 1.372041 -0.667557  
1 0.646510 1.960976 -0.487062  
1 2.994584 0.494934 0.474291  
6 2.019814 0.970823 0.627705  
1 2.166131 1.836766 1.273720  
6 -1.705184 0.159549 0.034324  
8 -1.322869 1.344225 0.005455  
8 -3.046117 -0.105524 0.096965  
1 -3.457826 0.767192 0.091831

#####

SP3-II-2-H b3lyp/6-311g(2d,d,p) if=118.1295

7 0.648813 0.010280 0.072838  
6 1.965463 0.156194 -0.592571  
1 2.484482 0.989197 -0.124740  
1 2.520576 -0.757593 -0.391503  
1 1.841407 0.316032 -1.666447  
7 0.923278 -0.350318 1.441672  
6 -0.238665 -1.040483 -0.640242  
1 0.167849 -2.017341 -0.397025  
1 -0.225947 -0.846142 -1.719917  
6 -0.228255 1.236522 -0.077693

1 -0.023835 1.721331 -1.035927  
1 0.029899 1.905427 0.738959  
7 -1.545426 -0.814529 -0.098484  
1 -1.533479 -1.182456 0.849260  
1 -2.245621 1.019732 -0.894101  
6 -1.673309 0.661812 -0.034543  
1 -2.212643 0.950901 0.867295  
1 0.059246 -0.101391 1.932258

#####

SP3-II-2-NH2 b3lyp/6-311g(2d,d,p) if=82.1328

7 -0.459651 -0.472898 -0.000153  
6 -1.155171 -1.772710 -0.128613  
1 -1.811069 -1.878902 0.732343  
1 -1.764001 -1.733563 -1.029425  
1 -0.431365 -2.588094 -0.178507  
7 -1.607202 0.498936 0.138833  
6 0.439691 -0.191279 -1.221807  
1 -0.176672 0.323892 -1.953672  
1 0.789809 -1.151966 -1.616385  
6 0.524317 -0.445629 1.164570  
1 0.538233 -1.418087 1.656838  
1 0.143734 0.303900 1.852765  
7 1.542109 0.592636 -0.744141  
1 1.152604 1.511192 -0.531830  
1 2.502695 -0.920758 0.354672  
6 1.875975 -0.042022 0.540301  
1 2.438806 0.646090 1.172532  
7 -1.020771 1.805179 0.173237  
1 -1.384984 2.367570 -0.593800  
1 -1.288053 2.281602 1.033329

#####

SP3-II-2-NO2 b3lyp/6-311g(2d,d,p) if=110.9140

7 0.350322 -0.712850 -0.024723  
6 0.861615 -2.110861 -0.156813  
1 0.441998 -2.701585 0.653176  
1 0.514391 -2.508239 -1.108128  
1 1.950648 -2.101164 -0.114993  
7 -1.103725 -0.939593 0.014601  
6 0.911283 0.163423 -1.225914  
1 0.081409 0.412281 -1.877898  
1 1.627765 -0.486315 -1.731767  
6 0.947824 -0.044476 1.210932

1 1.283565 -0.819651 1.897481  
1 0.163256 0.552171 1.663573  
7 1.547833 1.304926 -0.659972  
1 0.823504 1.996921 -0.491039  
1 2.989065 0.289125 0.491542  
6 2.060063 0.850241 0.638318  
1 2.279982 1.697888 1.287192  
7 -1.793720 0.215267 0.043505  
8 -3.012202 0.091771 0.104768  
8 -1.218457 1.338773 0.009962

#####

SP3-II-2-OH b3lyp/6-311g(2d,d,p) if=64.2396

7 -0.535373 -0.389331 0.005019  
6 -1.336834 -1.632515 -0.105834  
1 -2.004220 -1.672797 0.752164  
1 -1.930254 -1.559493 -1.014698  
1 -0.679487 -2.501961 -0.134460  
7 -1.566912 0.660157 0.085291  
6 0.407050 -0.218776 -1.225401  
1 -0.138685 0.383237 -1.945245  
1 0.617910 -1.219140 -1.618104  
6 0.444672 -0.421403 1.183121  
1 0.307285 -1.344230 1.745062  
1 0.180494 0.429820 1.804052  
7 1.605808 0.397312 -0.745580  
1 1.384874 1.375656 -0.575347  
1 2.308784 -1.232683 0.375367  
6 1.838650 -0.258954 0.550066  
1 2.513739 0.334505 1.168087  
8 -0.782004 1.905149 0.082891  
1 -0.950292 2.278820 0.955165

#####

SP3-II-3-CH3 b3lyp/6-311g(2d,d,p) if=81.7116

7 0.348006 0.515941 -0.028357  
6 0.510715 1.983090 -0.220526  
1 1.108804 2.343607 0.612146  
1 1.064277 2.134988 -1.144250  
1 -0.464361 2.474627 -0.258587  
7 1.697020 0.032366 0.151623  
6 1.728634 -1.406956 0.166881  
1 1.138489 -1.916681 0.965447  
1 2.771902 -1.677703 0.348653

1 1.448069 -1.922986 -0.782049  
6 -0.471704 -0.080625 -1.206501  
1 0.216192 -0.606557 -1.862910  
1 -0.946409 0.748508 -1.735103  
6 -0.607708 0.225571 1.168766  
1 -0.779558 1.140590 1.732753  
1 -0.071210 -0.496300 1.778526  
7 -1.476290 -0.938578 -0.627698  
1 -1.095887 -1.856437 -0.420772  
7 -1.830608 -0.335098 0.631004  
1 -2.516818 0.385442 0.428417

#####

SP3-II-3-CN b3lyp/6-311g(2d,d,p) if=75.3778

7 0.316918 -0.680479 0.020829  
6 1.214415 -1.856547 0.169621  
1 0.943939 -2.372196 1.088704  
1 1.032110 -2.515920 -0.675318  
1 2.253979 -1.527297 0.199066  
7 -1.024937 -1.250314 -0.135894  
1 2.224270 1.426541 -0.416079  
1 -0.384401 1.982401 0.441890  
6 0.466546 0.303758 1.212455  
1 1.399451 0.049938 1.720659  
1 -0.387832 0.174427 1.871417  
1 -0.190038 0.394869 -1.724287  
6 0.733029 0.227773 -1.173667  
1 1.467803 -0.283515 -1.793244  
7 0.545763 1.622614 0.642927  
7 1.227818 1.459712 -0.608293  
6 -1.908238 -0.271461 -0.116814  
7 -2.693245 0.598412 -0.099910

#####

SP3-II-3-COOH b3lyp/6-311g(2d,d,p) if=108.9522

7 0.433574 -0.712234 0.048655  
6 1.051028 -2.061763 0.190905  
1 0.733988 -2.479052 1.144326  
1 0.670835 -2.684743 -0.614243  
1 2.138116 -1.975033 0.148924  
7 -0.990132 -0.988743 -0.020814  
1 2.893171 0.543340 -0.562915  
1 0.708045 2.022723 0.372194  
6 0.931140 0.220359 1.197806



1 1.703985 -0.335808 1.730938  
1 0.092765 0.452429 1.845529  
1 0.163474 0.533676 -1.639994  
6 1.009019 0.017545 -1.197124  
1 1.433669 -0.713135 -1.883279  
7 1.485276 1.397317 0.574993  
7 1.978986 0.961917 -0.704292  
6 -1.710792 0.138014 -0.029253  
8 -1.343608 1.324954 0.037100  
8 -3.044183 -0.146858 -0.123761  
1 -3.472021 0.718109 -0.111976

#####

SP3-II-3-H b3lyp/6-311g(2d,d,p) if=56.5608

7 0.650646 -0.031610 -0.068977  
6 1.796667 0.417174 0.763266  
1 2.381747 -0.466357 1.008478  
1 2.402346 1.076446 0.146531  
1 1.446004 0.923134 1.665149  
7 1.231910 -0.672842 -1.213933  
1 -1.967678 1.122587 0.785225  
1 -1.675111 -1.185525 -0.744088  
6 -0.302031 -0.936352 0.733978  
1 -0.316844 -0.616751 1.782680  
1 0.068613 -1.950125 0.619096  
1 -0.162759 1.258262 -1.500140  
6 -0.311654 1.141981 -0.429138  
1 -0.039148 2.058357 0.097618  
7 -1.601478 -0.718208 0.155894  
7 -1.659327 0.701775 -0.084853  
1 0.412680 -0.910659 -1.786103

#####

SP3-II-3-NH2 b3lyp/6-311g(2d,d,p) if=90.9309

7 -0.360090 -0.515156 0.024919  
6 -0.691698 -1.947599 0.199119  
1 -1.257828 -2.051276 1.122182  
1 -1.327228 -2.233232 -0.635919  
1 0.219346 -2.548649 0.228964  
7 -1.701479 0.127822 -0.158100  
1 2.489261 -0.514916 -0.377730  
1 1.049771 1.753106 0.382431  
6 0.459690 0.024215 1.203194  
1 0.914827 -0.822691 1.725002

1 -0.217742 0.563735 1.858812  
1 0.107354 0.481825 -1.756474  
6 0.602945 -0.274179 -1.153969  
1 0.742306 -1.190212 -1.727362  
7 1.487077 0.871105 0.640058  
7 1.845738 0.237271 -0.605722  
7 -1.442637 1.538125 -0.166410  
1 -1.780273 1.946299 -1.036486  
1 -1.965682 1.987223 0.583296

#####

SP3-II-3-NO2 b3lyp/6-311g(2d,d,p) if=113.3765

7 0.362325 0.693744 -0.049242  
6 0.911904 2.075413 -0.192430  
1 0.581533 2.477134 -1.147777  
1 0.506318 2.683059 0.612215  
1 2.000430 2.033937 -0.147194  
7 -1.083754 0.954620 0.013873  
1 2.892871 -0.384768 0.580990  
1 0.874297 -2.050517 -0.398637  
6 0.898313 -0.210753 -1.203277  
1 1.608822 0.403980 -1.757746  
1 0.068907 -0.518022 -1.830883  
1 0.160678 -0.575329 1.638748  
6 0.968421 0.000647 1.200015  
1 1.339536 0.758015 1.887850  
7 1.564763 -1.328581 -0.581557  
7 2.007407 -0.865688 0.703725  
7 -1.798976 -0.188365 0.041407  
8 -1.245908 -1.321002 -0.013571  
8 -3.012540 -0.038928 0.118465

#####

SP3-II-3-OH b3lyp/6-311g(2d,d,p) if=84.1292

7 -0.466615 -0.438651 0.016177  
6 -1.006842 -1.810458 0.184128  
1 -1.583792 -1.831681 1.105828  
1 -1.670919 -2.003642 -0.655697  
1 -0.191045 -2.533865 0.215302  
7 -1.667233 0.385744 -0.130662  
1 2.357539 -0.885947 -0.392425  
1 1.329057 1.580327 0.418995  
6 0.431185 -0.034361 1.208866  
1 0.732487 -0.948568 1.727244

1 -0.158993 0.612334 1.850462  
1 0.166831 0.498073 -1.753007  
6 0.534535 -0.336922 -1.162854  
1 0.525655 -1.255470 -1.748155  
7 1.586262 0.625110 0.651217  
7 1.837343 -0.039725 -0.603622  
8 -1.120478 1.753498 -0.089706  
1 -1.324565 2.103559 -0.963505

#####

SP3-II-4-CN b3lyp/6-311g(2d,d,p) if=60.0505

7 -0.212174 -0.703160 0.045981  
6 -1.070000 -1.912948 0.143028  
1 -0.851007 -2.530505 -0.722995  
1 -0.807655 -2.425891 1.064829  
1 -2.109564 -1.596186 0.159302  
7 1.115200 -1.127317 -0.066865  
7 -0.548212 0.204181 1.204182  
1 0.316078 0.210943 1.742150  
6 -0.803158 1.535385 0.597396  
1 0.116903 2.105003 0.441944  
1 -1.498669 2.096250 1.222065  
7 -0.717122 0.124752 -1.199249  
1 0.180359 0.458543 -1.555824  
7 -1.407700 1.221054 -0.687907  
1 -2.382771 0.958214 -0.579434  
6 1.946217 -0.093762 -0.089663  
7 2.712575 0.787858 -0.107086

#####

SP3-II-4-COOH b3lyp/6-311g(2d,d,p) if=47.8623

7 -0.361190 0.658303 -0.059237  
6 -1.066377 1.964052 -0.131766  
1 -0.754158 2.542442 0.732445  
1 -0.755999 2.438592 -1.057469  
1 -2.141341 1.791640 -0.133250  
7 1.015597 0.950699 -0.041806  
7 -0.834098 -0.193723 -1.193964  
1 -0.006789 -0.761402 -1.370598  
6 -1.853434 -1.110477 -0.620135  
1 -1.496226 -2.139647 -0.702817  
1 -2.808933 -1.010644 -1.137427  
7 -0.877637 -0.074704 1.218669  
1 -0.143805 -0.783769 1.303403

7 -2.027619 -0.735443 0.793400  
1 -2.816417 -0.109996 0.912296  
6 1.766521 -0.160095 0.020817  
8 1.400303 -1.351238 0.047440  
8 3.087418 0.144416 0.044024  
1 3.536267 -0.709433 0.088767

#####

SP3-II-4-H b3lyp/6-311g(2d,d,p) if=105.7273

7 0.725410 0.087771 -0.086193  
6 1.662811 -0.593757 0.839439  
1 2.286409 -1.248831 0.237574  
1 2.268940 0.170424 1.322147  
1 1.089727 -1.154731 1.571970  
7 1.382092 0.717147 -1.051493  
7 -0.278745 0.898546 0.792951  
1 0.055310 1.842461 0.613156  
6 -1.581171 0.663124 0.157423  
1 -1.710657 1.197342 -0.795109  
1 -2.388347 0.939407 0.837224  
7 -0.338889 -1.109695 -0.601521  
1 -0.305714 -0.835683 -1.586371  
7 -1.595352 -0.771861 -0.101662  
1 -1.720562 -1.272964 0.773447  
1 0.673438 1.193012 -1.619776

#####

SP3-II-4-NO2 b3lyp/6-311g(2d,d,p) if=83.6657

7 0.324923 0.669121 0.060532  
6 0.955342 2.016700 0.121913  
1 0.609405 2.577127 -0.741326  
1 0.637653 2.479688 1.051375  
1 2.035519 1.889697 0.111399  
7 -1.076690 0.942359 0.041507  
7 0.844657 -0.134033 1.211502  
1 0.008773 -0.608196 1.544811  
6 1.725218 -1.175043 0.604110  
1 1.208367 -2.136366 0.580528  
1 2.656157 -1.256643 1.165311  
7 0.891531 -0.031947 -1.218955  
1 0.158734 -0.732112 -1.359917  
7 2.007234 -0.723153 -0.756029  
1 2.809813 -0.103719 -0.788083  
7 -1.820191 -0.191613 -0.035954

8 -3.026492 -0.026362 -0.048705  
8 -1.274511 -1.332959 -0.081102

#####

SP3-II-5-CN b3lyp/6-311g(2d,d,p) if=70.3259

7 0.356448 0.683715 -0.004287  
6 1.393595 1.735016 0.128071  
1 1.279092 2.411146 -0.714845  
1 1.213409 2.257222 1.064782  
1 2.369172 1.257729 0.130404  
7 -0.893461 1.287185 -0.089174  
7 0.613838 -0.352170 1.217071  
1 -0.184977 -0.160884 1.827404  
7 1.069862 -1.489758 -0.633514  
1 2.068645 -1.466983 -0.445435  
7 0.703976 -0.226653 -1.170132  
1 -0.204474 -0.346178 -1.618328  
7 0.421035 -1.617625 0.619091  
1 -0.567929 -1.790978 0.419505  
6 -1.858541 0.377886 -0.081067  
7 -2.726450 -0.404479 -0.074128

#####

SP3-II-5-COOH b3lyp/6-311g(2d,d,p) if=52.0517

7 0.426321 0.736403 0.024769  
6 1.123795 2.023459 0.263417  
1 0.800487 2.716886 -0.508089  
1 0.827205 2.376554 1.247889  
1 2.196679 1.852895 0.228353  
7 -0.937554 0.995769 -0.048138  
7 1.050836 -0.273172 1.206521  
1 0.200808 -0.524522 1.719787  
7 1.916040 -0.917425 -0.750387  
1 2.807784 -0.469148 -0.558024  
7 1.009782 0.083921 -1.190286  
1 0.208596 -0.405479 -1.584837  
7 1.415010 -1.417932 0.479927  
1 0.564525 -1.936260 0.237306  
6 -1.695507 -0.115948 -0.017645  
8 -1.351049 -1.300289 0.136160  
8 -3.007467 0.193155 -0.162880  
1 -3.470734 -0.651867 -0.100102

#####

SP3-II-5-NO2 b3lyp/6-311g(2d,d,p) if=74.2834

|   |           |           |           |
|---|-----------|-----------|-----------|
| 7 | -0.342593 | 0.723216  | -0.013694 |
| 6 | -0.986377 | 2.043736  | -0.230676 |
| 1 | -0.624022 | 2.720775  | 0.538256  |
| 1 | -0.699715 | 2.389124  | -1.220440 |
| 1 | -2.063619 | 1.914516  | -0.173376 |
| 7 | 1.037316  | 0.976495  | 0.023685  |
| 7 | -1.046063 | -0.249049 | -1.226800 |
| 1 | -0.214405 | -0.566840 | -1.735444 |
| 7 | -1.936836 | -0.819620 | 0.746152  |
| 1 | -2.787188 | -0.288691 | 0.579639  |
| 7 | -0.931201 | 0.081763  | 1.190615  |
| 1 | -0.171515 | -0.498475 | 1.543019  |
| 7 | -1.503806 | -1.344266 | -0.500398 |
| 1 | -0.727738 | -1.970954 | -0.278119 |
| 7 | 1.782438  | -0.162406 | 0.028876  |
| 8 | 1.238061  | -1.298323 | -0.068453 |
| 8 | 2.985898  | -0.002278 | 0.117386  |

#####

SP3-III-1-CH3 b3lyp/6-311g(2d,d,p) if=69.7868

|   |           |           |           |
|---|-----------|-----------|-----------|
| 6 | -1.290488 | 0.858755  | -1.194016 |
| 6 | -1.290381 | 0.860269  | 1.194605  |
| 1 | -1.394270 | 1.947125  | 1.147812  |
| 6 | 0.204901  | 0.442597  | 1.280633  |
| 1 | 0.413619  | -0.274754 | 2.072908  |
| 6 | 0.249129  | 0.634116  | -1.169702 |
| 1 | 0.801697  | 1.563839  | -1.044665 |
| 7 | 0.623410  | -0.260928 | -0.000524 |
| 7 | 1.992517  | -0.739549 | -0.000102 |
| 7 | -1.928713 | 0.289138  | 0.000111  |
| 1 | -1.734835 | 0.388684  | -2.074480 |
| 1 | -1.526365 | 1.924637  | -1.240366 |
| 1 | 0.633312  | 0.122629  | -2.051409 |
| 1 | -1.833619 | 0.519538  | 2.079265  |
| 1 | 0.872498  | 1.293300  | 1.405391  |
| 6 | 2.934603  | 0.355479  | 0.001917  |
| 1 | 2.906264  | 1.044807  | 0.876375  |
| 1 | 3.918797  | -0.120278 | 0.035020  |
| 1 | 2.947021  | 1.010582  | -0.897450 |
| 6 | -1.713048 | -1.165864 | 0.000393  |
| 1 | -2.138682 | -1.571714 | 0.921275  |
| 1 | -2.269824 | -1.601098 | -0.832806 |
| 6 | -0.203511 | -1.510414 | -0.113697 |

1 0.167884 -2.164141 0.673304  
1 0.078775 -1.953419 -1.067367

#####

SP3-III-1-CN b3lyp/6-311g(2d,d,p) if=31.7233

6 -1.329832 -0.976835 1.194915  
6 -1.330053 -0.976234 -1.195294  
1 -1.334356 -2.067892 -1.188918  
6 0.128094 -0.432269 -1.233494  
1 0.326032 0.226345 -2.077984  
6 0.128012 -0.432113 1.233605  
1 0.887281 -1.213329 1.224790  
7 0.372769 0.411344 0.000012  
7 1.696541 1.038184 0.000003  
7 -2.038290 -0.501468 -0.000007  
1 -1.882348 -0.652483 2.079096  
1 -1.333558 -2.068490 1.187591  
1 0.325239 0.226806 2.078024  
1 -1.882394 -0.650823 -2.079197  
1 0.886957 -1.213873 -1.224163  
6 -2.053217 0.966802 0.000368  
1 -2.602979 1.307562 -0.879256  
1 -2.602244 1.307067 0.880643  
6 -0.609254 1.546754 -0.000100  
1 -0.372349 2.141592 -0.880570  
1 -0.371962 2.142108 0.879914  
6 2.627703 0.101038 -0.000004  
7 3.481546 -0.700554 0.000001

#####

SP3-III-1-COOH b3lyp/6-311g(2d,d,p) if=41.3822

6 -1.761325 -0.885045 1.194526  
6 -1.761888 -0.882495 -1.196305  
1 -1.846498 -1.971054 -1.187234  
6 -0.267455 -0.453229 -1.241917  
1 -0.032815 0.203119 -2.079164  
6 -0.267687 -0.453431 1.242078  
1 0.430964 -1.285467 1.236784  
7 0.049985 0.362207 0.000121  
7 1.395197 0.913136 0.000059  
7 -2.433755 -0.358543 -0.000201  
1 -2.293865 -0.526181 2.078225  
1 -1.844134 -1.973717 1.181905  
1 -0.035271 0.203643 2.079461

1 -2.293632 -0.519951 -2.078997  
1 0.429588 -1.286575 -1.235441  
6 -2.334052 1.105560 0.001410  
1 -2.856433 1.489462 -0.877542  
1 -2.854532 1.487206 0.882460  
6 -0.849915 1.569736 0.000271  
1 -0.569293 2.146433 -0.879277  
1 -0.568191 2.147184 0.878985  
6 2.334405 -0.044479 -0.000020  
8 2.235302 -1.282121 0.000216  
8 3.579877 0.526804 -0.000248  
1 4.180197 -0.228866 -0.000019

#####

SP3-III-1-H b3lyp/6-311g(2d,d,p) if=39.2627

6 -1.117299 0.684523 -1.196571  
6 -1.117243 0.682411 1.197772  
1 -1.526705 1.695323 1.198987  
6 0.440998 0.708658 1.223855  
1 0.883718 0.188166 2.071092  
6 0.440931 0.709581 -1.223351  
1 0.852185 1.719181 -1.193678  
7 1.000708 0.005819 0.000007  
7 2.427934 -0.114394 -0.000106  
7 -1.606252 -0.014349 0.000003  
1 -1.511550 0.174785 -2.078762  
1 -1.525904 1.697789 -1.195267  
1 0.882882 0.189038 -2.070954  
1 -1.510643 0.170387 2.079052  
1 0.851379 1.718617 1.194365  
6 -1.081377 -1.387358 -0.001182  
1 -1.473095 -1.904897 0.877600  
1 -1.472364 -1.903025 -0.881392  
6 0.472809 -1.400148 -0.000532  
1 0.913022 -1.868811 0.877931  
1 0.913733 -1.868348 -0.878885  
1 2.733698 0.866263 0.000631

#####

SP3-III-1-NH2 b3lyp/6-311g(2d,d,p) if=44.0824

6 -1.274182 -0.872812 1.192826  
6 -1.274454 -0.871848 -1.193366  
1 -1.429812 -1.953334 -1.181899  
6 0.242634 -0.523164 -1.225365



1 0.523712 0.107623 -2.068234  
6 0.242730 -0.523434 1.225174  
1 0.895111 -1.395272 1.213451  
7 0.605203 0.271545 -0.000022  
7 2.036961 0.737794 0.000000  
7 -1.918370 -0.302280 0.000032  
1 -1.779404 -0.481566 2.079294  
1 -1.429031 -1.954358 1.180159  
1 0.523316 0.107413 2.068164  
1 -1.779519 -0.479383 -2.079385  
1 0.894603 -1.395307 -1.213574  
6 -1.715239 1.155444 0.000602  
1 -2.213233 1.570283 -0.878915  
1 -2.212498 1.569446 0.880929  
6 -0.201851 1.524077 0.000125  
1 0.115610 2.082971 -0.879436  
1 0.116163 2.083110 0.879399  
7 2.820404 -0.455149 0.000037  
1 3.423648 -0.477477 -0.819344  
1 3.424107 -0.477094 0.819084

#####

SP3-III-1-NO2 b3lyp/6-311g(2d,d,p) if=17.5946

6 1.747537 0.875084 1.194418  
6 1.747972 0.872166 -1.196485  
1 1.845426 1.959304 -1.183330  
6 0.247258 0.463283 -1.250378  
1 0.012407 -0.201571 -2.080839  
6 0.248070 0.462230 1.251284  
1 -0.436956 1.303236 1.268415  
7 -0.082956 -0.333749 0.000276  
7 -1.437715 -0.920301 0.000266  
7 2.408579 0.336019 -0.000305  
1 2.277326 0.514001 2.078562  
1 1.842094 1.962414 1.176707  
1 0.017043 -0.204436 2.081375  
1 2.276105 0.506113 -2.079585  
1 -0.435777 1.305975 -1.264573  
6 2.284092 -1.125088 0.001584  
1 2.798692 -1.519408 -0.877021  
1 2.795541 -1.516532 0.883312  
6 0.792028 -1.564729 -0.000556  
1 0.504625 -2.135442 -0.881671  
1 0.502738 -2.138119 0.878192

7 -2.411244 0.019870 -0.000003  
8 -2.167232 1.254132 0.000265  
8 -3.549974 -0.434893 -0.000312

#####

SP3-III-1-OH b3lyp/6-311g(2d,d,p) if=63.4059

6 1.259596 -0.872456 -1.191877  
6 1.236681 -0.880386 1.196195  
1 1.335960 -1.967528 1.151635  
6 -0.256531 -0.452542 1.256602  
1 -0.477988 0.246491 2.061692  
6 -0.269454 -0.580733 -1.197059  
1 -0.881233 -1.476258 -1.104316  
7 -0.620812 0.285443 -0.010397  
7 -2.025663 0.761830 0.002516  
7 1.895451 -0.312260 0.008925  
1 1.738926 -0.434141 -2.070485  
1 1.453169 -1.947320 -1.216879  
1 -0.602031 -0.019696 -2.070067  
1 1.769946 -0.541094 2.087347  
1 -0.957273 -1.281867 1.324431  
6 1.707086 1.146679 0.012570  
1 2.147860 1.543188 0.930067  
1 2.264267 1.571083 -0.825688  
6 0.201044 1.529491 -0.086062  
1 -0.149216 2.165002 0.726516  
1 -0.065535 2.010957 -1.026361  
8 -2.801391 -0.471165 0.106921  
1 -3.179089 -0.584905 -0.772771

#####

SP3-III-2-CH3 b3lyp/6-311g(2d,d,p) if=109.5203

6 -1.311613 1.052537 -1.016752  
6 -1.301150 0.564183 1.334964  
1 -1.631914 1.563463 1.626780  
6 0.241935 0.485870 1.237686  
1 0.704962 -0.092086 2.036641  
6 -0.207548 -1.490655 -0.080237  
1 0.205687 -2.089594 -0.889790  
6 0.166242 0.629849 -1.218854  
1 0.853086 1.473077 -1.263203  
7 0.611984 -0.238580 -0.047035  
7 1.976090 -0.716966 -0.134094  
7 -1.919783 0.226867 0.036759

1 -1.879856 0.912611 -1.936230  
1 -0.015424 -1.997454 0.869548  
1 -1.395822 2.099805 -0.715185  
1 0.315941 0.008950 -2.099296  
1 -1.687250 -0.136987 2.077996  
1 0.712126 1.467171 1.198500  
6 2.916887 0.361030 0.063535  
1 2.927655 0.838256 1.068157  
1 3.902502 -0.096154 -0.059631  
1 2.880709 1.198314 -0.669429  
7 -1.621380 -1.132397 -0.333851  
1 -2.249298 -1.738715 0.180639

#####

SP3-III-2-CN b3lyp/6-311g(2d,d,p) if=76.5606

6 1.315654 -1.134140 -1.059675  
6 1.389106 -0.737687 1.310436  
1 1.539884 -1.792886 1.545425  
6 -0.119140 -0.387622 1.248487  
1 -0.452285 0.261968 2.056281  
6 0.615426 1.522316 -0.063728  
1 0.305318 2.168642 -0.883718  
6 -0.098451 -0.513535 -1.217063  
1 -0.906181 -1.244469 -1.228717  
7 -0.363854 0.390457 -0.027802  
7 -1.680675 1.025154 -0.073067  
7 2.038946 -0.447461 0.017760  
1 1.884540 -1.024925 -1.982010  
1 0.492704 2.059571 0.881139  
1 1.259373 -2.195575 -0.809209  
1 -0.189580 0.125492 -2.093386  
1 1.898651 -0.153938 2.079456  
1 -0.775157 -1.256367 1.210964  
7 1.959933 0.953365 -0.299748  
1 2.665420 1.438708 0.241250  
6 -2.616642 0.094720 -0.003920  
7 -3.474121 -0.700162 0.053613

#####

SP3-III-2-COOH b3lyp/6-311g(2d,d,p) if=104.0597

6 -1.742444 1.030315 -1.078960  
6 -1.812217 0.654384 1.294243  
1 -2.051933 1.695317 1.520053  
6 -0.280217 0.437042 1.248686

1 0.095453 -0.173856 2.068596  
6 -0.855700 -1.546819 -0.033489  
1 -0.488070 -2.190565 -0.830947  
6 -0.292283 0.504776 -1.234506  
1 0.460956 1.286619 -1.268825  
7 0.042457 -0.344112 -0.014767  
7 1.380363 -0.906021 -0.036176  
7 -2.427433 0.304183 -0.001363  
1 -2.301619 0.886264 -2.003051  
1 -0.706364 -2.050724 0.926008  
1 -1.752972 2.093390 -0.828596  
1 -0.174826 -0.162072 -2.087014  
1 -2.281517 0.036206 2.062627  
1 0.305420 1.350159 1.191879  
7 -2.235447 -1.089976 -0.300548  
1 -2.907958 -1.621564 0.239217  
6 2.321966 0.049264 0.003601  
8 2.219586 1.284867 0.048014  
8 3.565535 -0.522639 -0.014135  
1 4.168254 0.230701 0.011561

#####

SP3-III-2-H b3lyp/6-311g(2d,d,p) if=101.0503

6 1.152030 1.347813 -0.171307  
6 1.118302 -0.906106 -1.017504  
1 1.659834 -0.639971 -1.928066  
6 -0.414253 -0.761210 -1.198759  
1 -0.959822 -1.702896 -1.194172  
6 -0.476343 -0.636326 1.217374  
1 -1.020590 -0.170752 2.037343  
6 -0.398418 1.424162 -0.086040  
1 -0.862558 1.896818 -0.951719  
7 -0.982798 0.020007 -0.027679  
7 -2.409513 -0.022787 0.078674  
7 1.588062 -0.032577 0.077437  
1 1.614615 1.990965 0.576881  
1 -0.774857 -1.685339 1.143311  
1 1.516305 1.646972 -1.157227  
1 -0.763270 1.918311 0.811675  
1 1.391420 -1.932610 -0.763462  
1 -0.693389 -0.203547 -2.094026  
7 0.983511 -0.402042 1.330152  
1 1.461138 -1.228014 1.670675  
1 -2.711577 0.361859 -0.823890

#####

SP3-III-2-NH2 b3lyp/6-311g(2d,d,p) if=106.9339

|   |           |           |           |
|---|-----------|-----------|-----------|
| 6 | 1.274530  | -1.178201 | -0.896632 |
| 6 | 1.313964  | -0.418623 | 1.380719  |
| 1 | 1.610470  | -1.399266 | 1.760168  |
| 6 | -0.227558 | -0.273789 | 1.309180  |
| 1 | -0.629537 | 0.455665  | 2.011620  |
| 6 | 0.208251  | 1.471434  | -0.297278 |
| 1 | -0.197674 | 1.930194  | -1.198687 |
| 6 | -0.215433 | -0.786028 | -1.088864 |
| 1 | -0.915888 | -1.607741 | -0.947757 |
| 7 | -0.593941 | 0.245665  | -0.056513 |
| 7 | -2.022330 | 0.706443  | -0.169588 |
| 7 | 1.911474  | -0.241308 | 0.040746  |
| 1 | 1.811313  | -1.132213 | -1.844023 |
| 1 | 0.022563  | 2.135119  | 0.551791  |
| 1 | 1.378445  | -2.186649 | -0.488481 |
| 1 | -0.408364 | -0.314761 | -2.051173 |
| 1 | 1.752035  | 0.332941  | 2.041455  |
| 1 | -0.769817 | -1.209496 | 1.432467  |
| 7 | 1.625707  | 1.072020  | -0.482072 |
| 1 | 2.250472  | 1.725120  | -0.024556 |
| 7 | -2.807339 | -0.450672 | 0.107441  |
| 1 | -3.404561 | -0.288022 | 0.915708  |
| 1 | -3.416980 | -0.654690 | -0.681380 |

#####

SP3-III-2-NO2 b3lyp/6-311g(2d,d,p) if=106.9627

|   |           |           |           |
|---|-----------|-----------|-----------|
| 6 | 1.725500  | 1.031715  | 1.068465  |
| 6 | 1.797389  | 0.624873  | -1.300904 |
| 1 | 2.065225  | 1.654105  | -1.546323 |
| 6 | 0.258560  | 0.456374  | -1.251827 |
| 1 | -0.139539 | -0.141361 | -2.070992 |
| 6 | 0.800688  | -1.540406 | 0.024483  |
| 1 | 0.417512  | -2.192949 | 0.807450  |
| 6 | 0.276245  | 0.511254  | 1.245692  |
| 1 | -0.469782 | 1.296012  | 1.314038  |
| 7 | -0.075596 | -0.315100 | 0.015824  |
| 7 | -1.421668 | -0.913612 | 0.043331  |
| 7 | 2.400976  | 0.280545  | 0.001452  |
| 1 | 2.287403  | 0.906588  | 1.993497  |
| 1 | 0.655547  | -2.024639 | -0.945746 |
| 1 | 1.735623  | 2.089080  | 0.795526  |

1 0.177338 -0.171517 2.087688  
1 2.247826 -0.020377 -2.057831  
1 -0.291776 1.389133 -1.196883  
7 2.179671 -1.104966 0.317138  
1 2.854686 -1.658996 -0.196518  
7 -2.397595 0.023317 -0.002752  
8 -2.150954 1.255093 -0.050367  
8 -3.535404 -0.432497 0.009829

#####

SP3-III-2-OH b3lyp/6-311g(2d,d,p) if=107.0360

6 1.250544 -1.170476 -0.914222  
6 1.286670 -0.441839 1.375725  
1 1.583075 -1.424872 1.748237  
6 -0.253430 -0.299931 1.300951  
1 -0.669271 0.407666 2.016319  
6 0.208032 1.485776 -0.263912  
1 -0.190929 1.979448 -1.150353  
6 -0.231106 -0.755300 -1.115272  
1 -0.938193 -1.575051 -1.001803  
7 -0.610149 0.259559 -0.058368  
7 -2.010562 0.735835 -0.146468  
7 1.889007 -0.251634 0.039172  
1 1.795509 -1.121038 -1.856612  
1 0.032545 2.121752 0.607811  
1 1.336873 -2.184494 -0.516531  
1 -0.406946 -0.258503 -2.067790  
1 1.721748 0.304435 2.044121  
1 -0.795744 -1.237754 1.395243  
7 1.616533 1.069759 -0.467819  
1 2.253594 1.711416 -0.010877  
8 -2.787926 -0.450651 0.196259  
1 -3.176919 -0.721815 -0.643067

#####

SP3-III-3-CH3 b3lyp/6-311g(2d,d,p) if=125.5235

6 -0.148584 0.364466 -1.311526  
1 -0.182058 -0.440760 -2.046123  
6 -0.228595 0.691920 1.113575  
1 -0.712931 1.635767 0.862345  
7 -0.605895 -0.286389 0.000819  
7 -1.965235 -0.763976 -0.007568  
1 -0.673698 0.296937 2.025923  
1 -0.885034 1.119081 -1.579152

6 -2.905516 0.335498 0.020821  
1 -2.837968 1.076096 -0.809297  
1 -3.891377 -0.127049 -0.077881  
1 -2.946330 0.936211 0.955327  
6 0.248081 -1.510222 0.171933  
1 -0.178233 -2.242928 -0.509618  
1 0.067303 -1.858769 1.187815  
6 1.725908 -1.164126 -0.112293  
1 2.038449 -1.503960 -1.102780  
1 2.376390 -1.646563 0.620813  
6 1.869044 0.364633 -0.018608  
1 2.914645 0.676297 -0.018585  
7 1.182129 0.948287 -1.167857  
1 1.127781 1.953611 -1.043738  
7 1.223456 0.857435 1.221543  
1 1.579850 0.345523 2.022979

#####

SP3-III-3-CN b3lyp/6-311g(2d,d,p) if=71.3027

6 -0.082518 -0.217770 1.286400  
1 -0.103366 0.619185 1.990727  
6 0.641024 1.489544 -0.282133  
1 0.499649 1.814814 -1.313430  
6 -0.097983 -0.667791 -1.134984  
1 -0.750834 -1.507982 -0.905696  
7 -0.353370 0.381457 -0.066676  
7 -1.664582 1.015194 -0.144096  
7 2.021600 -0.464109 0.110536  
1 0.360657 2.300677 0.388693  
1 -0.422540 -0.213463 -2.069423  
1 -0.902861 -0.900786 1.508705  
7 1.994183 0.973181 -0.038732  
1 2.412469 1.368387 0.794278  
7 1.203986 -0.935391 1.200105  
1 1.739963 -0.845523 2.055343  
6 1.412870 -1.026384 -1.103314  
1 1.944363 -0.609653 -1.958326  
1 1.554774 -2.104870 -1.079180  
6 -2.608372 0.096569 -0.017030  
7 -3.476445 -0.679733 0.095246

#####

SP3-III-3-COOH b3lyp/6-311g(2d,d,p) if=102.3903

6 0.301127 0.362087 -1.263546

1 0.255284 -0.414340 -2.034192  
6 0.879425 -1.534295 0.135019  
1 0.719251 -1.937077 1.135772  
6 0.303051 0.574959 1.203484  
1 -0.271879 1.482892 1.053193  
7 -0.035706 -0.338536 0.030109  
7 -1.367893 -0.905412 0.055127  
7 2.409817 0.328433 -0.063283  
1 0.534604 -2.261993 -0.597739  
1 -0.067493 0.052866 2.084311  
1 -0.464115 1.115235 -1.430985  
7 2.266190 -1.111148 -0.080925  
1 2.632577 -1.435335 -0.967394  
7 1.629385 0.981576 -1.083952  
1 2.164556 0.964175 -1.944404  
6 1.839972 0.789349 1.212052  
1 2.327100 0.225206 2.007461  
1 2.078705 1.845572 1.320502  
6 -2.313912 0.047916 0.000055  
8 -2.210570 1.279564 -0.080867  
8 -3.554153 -0.527430 0.038663  
1 -4.161335 0.221233 -0.010816

#####

SP3-III-3-H b3lyp/6-311g(2d,d,p) if=100.4469

6 -0.413662 -0.829082 -1.124888  
1 -0.735404 -1.848273 -0.897050  
6 -0.444634 -0.523515 1.277113  
1 -0.757536 0.187436 2.041406  
6 -0.377666 1.419580 -0.167010  
1 -0.668400 1.762367 -1.160165  
7 -0.969554 0.025863 -0.015963  
7 -2.394091 -0.033958 0.088620  
7 1.581358 -0.066181 0.019780  
1 -0.963226 -1.467615 1.439777  
1 -0.893324 2.020967 0.578977  
1 -0.902326 -0.499665 -2.042677  
7 1.020991 -0.664219 1.210555  
1 1.309827 -1.634851 1.212787  
7 1.052985 -0.628898 -1.199145  
1 1.542592 -1.500487 -1.366789  
6 1.163670 1.343509 0.020625  
1 1.474511 1.772835 0.972827  
1 1.687901 1.846421 -0.790290



1 -2.702680 0.469663 -0.750763  
#####  
SP3-III-3-NH2 b3lyp/6-311g(2d,d,p) if=94.4512

6 -0.208312 0.096214 1.319061  
1 -0.341576 1.093846 1.747732  
6 0.233148 1.319794 -0.710646  
1 0.020757 1.314904 -1.779914  
6 -0.205324 -1.051736 -0.840841  
1 -0.755174 -1.850808 -0.348985  
7 -0.582019 0.222236 -0.121667  
7 -2.006389 0.661618 -0.309512  
7 1.895384 -0.228681 0.161310  
1 -0.137353 2.251685 -0.282818  
1 -0.587189 -0.930081 -1.853754  
1 -0.922098 -0.595808 1.764517  
7 1.660750 1.073124 -0.428277  
1 2.041265 1.756129 0.215265  
7 1.174067 -0.431247 1.396307  
1 1.703079 0.021368 2.132954  
6 1.338729 -1.217996 -0.774306  
1 1.804022 -1.045073 -1.744747  
1 1.616451 -2.206282 -0.411714  
7 -2.797498 -0.414054 0.190186  
1 -3.410159 -0.079817 0.930341  
1 -3.391542 -0.788692 -0.546925

#####  
SP3-III-3-NO2 b3lyp/6-311g(2d,d,p) if=105.7363

6 0.285806 0.361487 -1.275993  
1 0.261597 -0.435754 -2.026776  
6 0.828890 -1.527148 0.146854  
1 0.679925 -1.902089 1.159743  
6 0.281621 0.595631 1.204220  
1 -0.254952 1.524318 1.052470  
7 -0.070718 -0.310351 0.028205  
7 -1.408135 -0.915199 0.052691  
7 2.383757 0.307380 -0.063651  
1 0.465691 -2.267517 -0.563839  
1 -0.111141 0.088661 2.084441  
1 -0.472615 1.108841 -1.487808  
7 2.212998 -1.129084 -0.101379  
1 2.553686 -1.449117 -0.999564  
7 1.604052 0.986090 -1.069967

1 2.143317 1.006353 -1.927913  
6 1.825566 0.758535 1.220804  
1 2.293240 0.164246 2.005823  
1 2.094271 1.804702 1.352617  
7 -2.389007 0.021476 0.002256  
8 -2.139691 1.248414 -0.085984  
8 -3.524677 -0.435395 0.040785

#####

SP3-III-3-OH b3lyp/6-311g(2d,d,p) if=118.9129

6 -0.220007 0.043091 1.326271  
1 -0.315719 1.027758 1.791989  
6 0.236333 1.357637 -0.651273  
1 0.048292 1.386300 -1.724850  
6 -0.233415 -1.002217 -0.893067  
1 -0.762379 -1.827325 -0.422524  
7 -0.598515 0.243642 -0.110972  
7 -1.996243 0.711933 -0.248181  
7 1.872746 -0.250593 0.147464  
1 -0.135984 2.277544 -0.199723  
1 -0.634306 -0.840462 -1.893170  
1 -0.957148 -0.634847 1.752151  
7 1.653101 1.093106 -0.346597  
1 2.015520 1.726713 0.355362  
7 1.140392 -0.536747 1.359601  
1 1.680889 -0.173850 2.136505  
6 1.311583 -1.162961 -0.860888  
1 1.763617 -0.906820 -1.819193  
1 1.597587 -2.176877 -0.586718  
8 -2.777562 -0.410486 0.251925  
1 -3.147212 -0.816934 -0.540694

#####

SP3-III-4-CH3 b3lyp/6-311g(2d,d,p) if=109.1329

7 -0.641217 0.281843 -0.034045  
7 -1.892554 0.715025 -0.036675  
7 1.849791 -0.267202 0.024952  
7 0.220677 1.461641 -0.181682  
1 -0.269503 2.179762 0.346106  
7 -0.244219 -0.569005 1.215498  
1 -0.326396 0.130449 1.950546  
7 -0.212258 -0.674911 -1.166674  
1 -0.627735 -0.190476 -1.961193  
6 1.148784 -1.034995 1.060990

1 1.151815 -2.085732 0.766145  
1 1.669587 -0.938442 2.018046  
6 1.598657 1.150238 0.263737  
1 1.779202 1.354787 1.327023  
1 2.282165 1.766023 -0.325863  
6 1.282485 -0.640426 -1.268568  
1 1.636101 0.069079 -2.022273  
1 1.622737 -1.643410 -1.536462  
6 -2.866967 -0.366667 0.033153  
1 -2.758001 -0.998209 0.925027  
1 -3.847995 0.110958 0.067930  
1 -2.851279 -1.035422 -0.840513

#####

SP3-III-4-CN b3lyp/6-311g(2d,d,p) if=69.1200

7 0.359988 0.347771 0.031341  
7 1.615408 0.950288 0.041636  
7 -2.004392 -0.436531 -0.032025  
7 -0.586888 1.471972 0.098734  
1 -0.164300 2.192087 -0.482509  
7 0.148100 -0.535090 -1.137046  
1 0.243208 0.095289 -1.929725  
7 0.072099 -0.530761 1.185603  
1 0.445316 0.012060 1.962340  
6 -1.203669 -1.147146 -1.029656  
1 -1.100591 -2.187394 -0.719646  
1 -1.689112 -1.112061 -2.007160  
6 -1.929732 0.993394 -0.316496  
1 -2.139472 1.144942 -1.381838  
1 -2.672516 1.540810 0.266821  
6 -1.420431 -0.692905 1.281289  
1 -1.866611 -0.008886 2.007686  
1 -1.619979 -1.722544 1.580664  
6 2.610021 0.065138 -0.001531  
7 3.570959 -0.591247 -0.030852

#####

SP3-III-4-COOH b3lyp/6-311g(2d,d,p) if=68.0708

7 0.039060 -0.296243 -0.060683  
7 1.316192 -0.841889 -0.111852  
7 -2.385924 0.300938 0.066603  
7 -0.841807 -1.456145 -0.336947  
1 -0.362783 -2.234957 0.109069  
7 -0.263323 0.347820 1.237588

1 -0.181208 -0.420272 1.899149  
7 -0.305504 0.735497 -1.058703  
1 0.144538 0.389234 -1.902781  
6 -1.635837 0.907292 1.171423  
1 -1.575042 1.982767 1.003667  
1 -2.137483 0.720477 2.123486  
6 -2.208364 -1.148003 0.143470  
1 -2.401275 -1.464849 1.175841  
1 -2.915437 -1.658642 -0.513808  
6 -1.799064 0.775340 -1.185059  
1 -2.172531 0.157029 -2.006065  
1 -2.081452 1.815520 -1.355433  
6 2.321575 0.077882 -0.007477  
8 2.308275 1.293908 0.027338  
8 3.507238 -0.615056 0.035563  
1 4.177846 0.077962 0.077474

#####

SP3-III-4-H b3lyp/6-311g(2d,d,p) if=177.2364

7 -1.000084 0.026316 -0.024949  
7 -2.329604 0.009470 0.066699  
7 1.536265 -0.043446 0.051434  
7 -0.468957 -0.193922 1.330518  
1 -1.115334 -0.870508 1.728668  
7 -0.434492 -0.945742 -1.045170  
1 -0.718733 -1.841604 -0.654256  
7 -0.353887 1.342209 -0.501500  
1 -0.897330 2.001480 0.053246  
6 1.042889 -0.798451 -1.102788  
1 1.315742 -0.257292 -2.009986  
1 1.504181 -1.789331 -1.130855  
6 0.948117 -0.618411 1.256665  
1 1.082407 -1.707127 1.215875  
1 1.456466 -0.241619 2.147346  
6 1.084815 1.341965 -0.085022  
1 1.253353 1.857722 0.864845  
1 1.665110 1.836169 -0.867615  
1 -2.645472 0.097293 -0.899613

#####

SP3-III-4-NH2 b3lyp/6-311g(2d,d,p) if=110.9358

7 0.618500 0.221287 0.056165  
7 1.921571 0.688151 0.100532  
7 -1.857490 -0.239197 -0.050010

7 -0.189128 1.401926 0.378621  
1 0.327968 2.167096 -0.049494  
7 0.235776 -0.397981 -1.265556  
1 0.344067 0.388956 -1.901754  
7 0.207913 -0.849783 1.030542  
1 0.680304 -0.535006 1.875125  
6 -1.168701 -0.864261 -1.185720  
1 -1.184587 -1.945896 -1.045233  
1 -1.680948 -0.621176 -2.120398  
6 -1.576113 1.194479 -0.092777  
1 -1.759337 1.548912 -1.115575  
1 -2.240571 1.736708 0.584027  
6 -1.281180 -0.792231 1.176626  
1 -1.603932 -0.176946 2.021874  
1 -1.641806 -1.813550 1.318561  
7 2.796886 -0.432674 -0.057306  
1 3.261299 -0.372591 -0.960779  
1 3.515308 -0.346534 0.653955

#####

SP3-III-4-NO2 b3lyp/6-311g(2d,d,p) if=80.4507

7 -0.061451 -0.285649 0.073184  
7 -1.360062 -0.881184 0.145871  
7 2.348597 0.299702 -0.086557  
7 0.804177 -1.462178 0.322308  
1 0.325334 -2.231967 -0.140513  
7 0.206422 0.357296 -1.217580  
1 0.109768 -0.402617 -1.886274  
7 0.289728 0.718240 1.082198  
1 -0.144062 0.355754 1.928096  
6 1.581457 0.917743 -1.172520  
1 1.524086 1.991699 -0.995588  
1 2.062431 0.736941 -2.135846  
6 2.168679 -1.147763 -0.170681  
1 2.348370 -1.460433 -1.205986  
1 2.879951 -1.663051 0.477647  
6 1.787393 0.764532 1.179345  
1 2.177044 0.142717 1.989723  
1 2.067263 1.804850 1.350325  
7 -2.387072 0.040378 0.003926  
8 -2.197166 1.253925 -0.015776  
8 -3.485051 -0.502326 -0.066962

#####

SP3-III-4-OH b3lyp/6-311g(2d,d,p) if=120.1416

7 0.623097 0.232737 0.043754  
7 1.941335 0.710075 0.077132  
7 -1.837560 -0.251859 -0.063208  
7 -0.179443 1.462346 0.101009  
1 0.333295 2.108669 -0.495285  
7 0.313888 -0.640099 -1.107956  
1 0.541867 -0.057088 -1.907990  
7 0.179478 -0.597334 1.229906  
1 0.547078 -0.021771 1.985737  
6 -1.107203 -1.054911 -1.046368  
1 -1.167606 -2.102546 -0.745255  
1 -1.559070 -0.947004 -2.035682  
6 -1.564733 1.156094 -0.333851  
1 -1.737146 1.338375 -1.401633  
1 -2.242432 1.791859 0.240185  
6 -1.325161 -0.596688 1.260982  
1 -1.720618 0.116960 1.989016  
1 -1.660344 -1.601454 1.525094  
8 2.794233 -0.415089 -0.142821  
1 3.008131 -0.743320 0.739345

#####

SP3-III-5-CN b3lyp/6-311g(2d,d,p) if=75.4073

6 -2.054435 0.912700 -0.021979  
6 -0.650965 1.526871 0.180760  
1 -0.481045 1.926042 1.178185  
7 0.360339 0.427129 0.018264  
7 1.619955 1.015035 -0.041633  
7 -1.963908 -0.558980 -0.016864  
1 -2.497782 1.201259 -0.974625  
1 -2.733686 1.214639 0.775502  
1 -0.378894 2.279863 -0.555143  
7 -1.272798 -0.959646 -1.184633  
1 -1.128018 -1.960514 -1.078271  
7 0.075843 -0.371322 -1.238328  
1 0.069327 0.348768 -1.960469  
7 -1.219752 -1.030380 1.123815  
1 -1.680923 -0.640934 1.942949  
7 0.158429 -0.508990 1.148763  
1 0.768537 -1.288808 0.899347  
6 2.588507 0.101582 -0.009462  
7 3.493869 -0.631022 0.030131

#####

SP3-III-5-COOH b3lyp/6-311g(2d,d,p) if=91.8211

|   |           |           |           |
|---|-----------|-----------|-----------|
| 6 | 2.340038  | -1.022333 | 0.068762  |
| 6 | 0.908290  | -1.523438 | 0.368898  |
| 1 | 0.737090  | -1.777909 | 1.412598  |
| 7 | -0.041395 | -0.395667 | 0.073786  |
| 7 | -1.334883 | -0.927097 | 0.066080  |
| 7 | 2.335856  | 0.443930  | -0.092370 |
| 1 | 2.741847  | -1.444947 | -0.852369 |
| 1 | 3.021935  | -1.272553 | 0.881890  |
| 1 | 0.581247  | -2.351321 | -0.255804 |
| 7 | 1.635798  | 0.749128  | -1.289727 |
| 1 | 1.514461  | 1.758603  | -1.273503 |
| 7 | 0.289854  | 0.185488  | -1.289884 |
| 1 | 0.305741  | -0.646080 | -1.879261 |
| 7 | 1.628978  | 1.075121  | 0.996274  |
| 1 | 2.077344  | 0.741999  | 1.846915  |
| 7 | 0.225408  | 0.651222  | 1.079616  |
| 1 | -0.378817 | 1.411360  | 0.749336  |
| 6 | -2.281751 | 0.042416  | 0.019806  |
| 8 | -2.170025 | 1.268699  | 0.075653  |
| 8 | -3.511399 | -0.529762 | -0.088428 |
| 1 | -4.126231 | 0.214604  | -0.078810 |

#####

SP3-III-5-H b3lyp/6-311g(2d,d,p) if=97.3740

|   |           |           |           |
|---|-----------|-----------|-----------|
| 6 | -1.039678 | 1.348301  | -0.257279 |
| 6 | 0.475521  | 1.413194  | 0.037530  |
| 1 | 0.706615  | 1.811085  | 1.024027  |
| 7 | 1.040898  | 0.026649  | 0.034385  |
| 7 | 2.356371  | 0.058883  | -0.005309 |
| 7 | -1.558855 | -0.012680 | -0.037755 |
| 1 | -1.268914 | 1.608631  | -1.291165 |
| 1 | -1.589189 | 2.032936  | 0.390517  |
| 1 | 1.045690  | 1.963192  | -0.707502 |
| 7 | -1.063551 | -0.839234 | -1.082376 |
| 1 | -1.311623 | -1.784850 | -0.805155 |
| 7 | 0.400709  | -0.803718 | -1.155101 |
| 1 | 0.645241  | -0.208709 | -1.947270 |
| 7 | -1.079809 | -0.546454 | 1.219355  |
| 1 | -1.340247 | 0.134669  | 1.928521  |
| 7 | 0.370967  | -0.677560 | 1.267919  |
| 1 | 0.566313  | -1.650681 | 1.031800  |
| 1 | 2.663937  | -0.916455 | 0.006897  |

#####

SP3-III-5-NO2 b3lyp/6-311g(2d,d,p) if=98.0607

|   |           |           |           |
|---|-----------|-----------|-----------|
| 6 | 2.291762  | -1.043130 | -0.022930 |
| 6 | 0.864215  | -1.531495 | 0.314680  |
| 1 | 0.724712  | -1.808451 | 1.357211  |
| 7 | -0.069731 | -0.371865 | 0.077511  |
| 7 | -1.373568 | -0.943411 | 0.083941  |
| 7 | 2.310523  | 0.430229  | -0.099556 |
| 1 | 2.643241  | -1.420335 | -0.983394 |
| 1 | 3.001616  | -1.354475 | 0.743521  |
| 1 | 0.505017  | -2.338481 | -0.319686 |
| 7 | 1.576205  | 0.813447  | -1.254924 |
| 1 | 1.461091  | 1.820990  | -1.180336 |
| 7 | 0.237599  | 0.246448  | -1.263964 |
| 1 | 0.247509  | -0.562064 | -1.884468 |
| 7 | 1.642646  | 1.003153  | 1.046004  |
| 1 | 2.095938  | 0.603382  | 1.864803  |
| 7 | 0.229813  | 0.622049  | 1.122042  |
| 1 | -0.346365 | 1.413327  | 0.828605  |
| 7 | -2.354290 | 0.016526  | 0.010995  |
| 8 | -2.102195 | 1.236863  | 0.067668  |
| 8 | -3.480679 | -0.439635 | -0.096557 |

#####

SP3-III-6-CN b3lyp/6-311g(2d,d,p) if=75.0556

|   |           |           |           |
|---|-----------|-----------|-----------|
| 6 | -1.947575 | 0.982316  | -0.115533 |
| 7 | 0.358969  | 0.395739  | 0.054921  |
| 7 | 1.590190  | 1.002985  | -0.012285 |
| 7 | -1.983967 | -0.480649 | -0.026473 |
| 1 | -2.198556 | 1.247632  | -1.147186 |
| 1 | -2.686825 | 1.413658  | 0.559815  |
| 1 | -0.229036 | 2.260714  | -0.108727 |
| 7 | -1.273049 | -0.975252 | -1.156423 |
| 1 | -1.146723 | -1.970292 | -0.990054 |
| 7 | 0.049834  | -0.382935 | -1.244818 |
| 1 | 0.017623  | 0.365223  | -1.937815 |
| 7 | -1.279986 | -0.930509 | 1.167241  |
| 1 | -1.670312 | -0.403121 | 1.944552  |
| 7 | 0.132088  | -0.620366 | 1.124550  |
| 1 | 0.618751  | -1.439323 | 0.758941  |
| 7 | -0.606368 | 1.425222  | 0.330754  |
| 6 | 2.583811  | 0.118367  | -0.006725 |
| 7 | 3.509098  | -0.588320 | -0.001178 |



#####

SP3-III-6-COOH b3lyp/6-311g(2d,d,p) if=106.8502

|   |           |           |           |
|---|-----------|-----------|-----------|
| 6 | 2.229158  | -1.094110 | 0.001124  |
| 7 | -0.039479 | -0.358594 | 0.105470  |
| 7 | -1.306138 | -0.913665 | 0.093277  |
| 7 | 2.345540  | 0.365299  | -0.093109 |
| 1 | 2.458288  | -1.499758 | -0.989521 |
| 1 | 2.952437  | -1.475698 | 0.722377  |
| 1 | 0.440333  | -2.261072 | 0.156300  |
| 7 | 1.637232  | 0.753630  | -1.270223 |
| 1 | 1.540383  | 1.764033  | -1.209795 |
| 7 | 0.305299  | 0.196961  | -1.287653 |
| 1 | 0.325611  | -0.653066 | -1.850701 |
| 7 | 1.675735  | 0.992516  | 1.039497  |
| 1 | 2.051733  | 0.540122  | 1.869487  |
| 7 | 0.251176  | 0.748326  | 1.046466  |
| 1 | -0.255860 | 1.529538  | 0.624231  |
| 7 | 0.870284  | -1.407564 | 0.503397  |
| 6 | -2.272932 | 0.036657  | 0.019635  |
| 8 | -2.174437 | 1.261845  | 0.039291  |
| 8 | -3.489036 | -0.562558 | -0.077990 |
| 1 | -4.120032 | 0.167976  | -0.097207 |

#####

SP3-III-6-NO2 b3lyp/6-311g(2d,d,p) if=99.1298

|   |           |           |           |
|---|-----------|-----------|-----------|
| 6 | -2.180930 | 1.110570  | -0.056111 |
| 7 | 0.063229  | 0.333327  | 0.110292  |
| 7 | 1.347947  | 0.931145  | 0.117457  |
| 7 | -2.318730 | -0.349005 | -0.108903 |
| 1 | -2.379260 | 1.491479  | -1.062692 |
| 1 | -2.911350 | 1.526291  | 0.638106  |
| 1 | -0.380867 | 2.254625  | 0.113283  |
| 7 | -1.586016 | -0.782514 | -1.254865 |
| 1 | -1.505440 | -1.792526 | -1.169316 |
| 7 | -0.249443 | -0.238786 | -1.261961 |
| 1 | -0.246017 | 0.592631  | -1.852100 |
| 7 | -1.685546 | -0.946659 | 1.060704  |
| 1 | -2.066127 | -0.457914 | 1.867785  |
| 7 | -0.256762 | -0.735667 | 1.080403  |
| 1 | 0.228065  | -1.541163 | 0.685375  |
| 7 | -0.827651 | 1.413322  | 0.469760  |
| 7 | 2.343799  | -0.007901 | 0.011181  |
| 8 | 3.460770  | 0.471731  | -0.091093 |

8 2.105580 -1.228940 0.034562  
#####  
SP3-III-7-CN b3lyp/6-311g(2d,d,p) if=72.5485

7 0.362459 0.388000 0.032646  
7 1.586397 0.989037 -0.060979  
7 -1.991071 -0.439660 -0.016381  
1 -2.588765 1.391039 0.364310  
1 -0.265642 2.199283 -0.301073  
7 -1.278535 -1.027669 -1.109224  
1 -1.138054 -2.001675 -0.851932  
7 0.005321 -0.408836 -1.259033  
1 -0.092805 0.337897 -1.946713  
7 -1.290498 -0.841824 1.201579  
1 -1.660168 -0.263853 1.952426  
7 0.123781 -0.589904 1.128799  
1 0.586293 -1.433807 0.788968  
7 -0.595226 1.444290 0.302550  
7 -1.899136 0.966803 -0.250625  
6 2.580775 0.106307 -0.009389  
7 3.501435 -0.604054 0.037860

#####  
SP3-III-7-COOH b3lyp/6-311g(2d,d,p) if=107.6357

7 0.042453 -0.359916 -0.092217  
7 1.301703 -0.912822 -0.069803  
7 -2.344605 0.332493 0.092361  
1 -2.861559 -1.459875 -0.515765  
1 -0.485051 -2.229571 0.034080  
7 -1.625320 0.810689 1.238791  
1 -1.507970 1.809696 1.087658  
7 -0.332687 0.212408 1.299539  
1 -0.418210 -0.636647 1.857234  
7 -1.686214 0.913613 -1.074873  
1 -2.051476 0.413340 -1.881701  
7 -0.263034 0.713576 -1.060620  
1 0.231455 1.517240 -0.666384  
7 -0.865339 -1.431557 -0.477266  
7 -2.183633 -1.088528 0.144335  
6 2.265015 0.044162 -0.021706  
8 2.151817 1.267212 -0.067875  
8 3.484149 -0.542271 0.083714  
1 4.111721 0.191613 0.086668

#####

SP3-III-7-NO2 b3lyp/6-311g(2d,d,p) if=99.4195

|   |           |           |           |
|---|-----------|-----------|-----------|
| 7 | 0.066950  | -0.335460 | -0.096240 |
| 7 | 1.342228  | -0.931367 | -0.088475 |
| 7 | -2.316510 | 0.316536  | 0.108560  |
| 1 | -2.818528 | -1.509449 | -0.415044 |
| 1 | -0.423241 | -2.221639 | 0.076763  |
| 7 | -1.573544 | 0.844819  | 1.217903  |
| 1 | -1.473533 | 1.840541  | 1.035732  |
| 7 | -0.275857 | 0.259448  | 1.272736  |
| 1 | -0.339783 | -0.570470 | 1.861094  |
| 7 | -1.695648 | 0.861018  | -1.096275 |
| 1 | -2.065011 | 0.322676  | -1.876299 |
| 7 | -0.268889 | 0.695717  | -1.097840 |
| 1 | 0.202293  | 1.524415  | -0.735142 |
| 7 | -0.823763 | -1.437081 | -0.440916 |
| 7 | -2.128736 | -1.099025 | 0.209119  |
| 7 | 2.334604  | 0.016378  | -0.013407 |
| 8 | 2.081352  | 1.233906  | -0.066910 |
| 8 | 3.455144  | -0.449275 | 0.095253  |

#####

SP3-IV-1-CH3 b3lyp/6-311g(2d,d,p) if=89.9621

|   |           |           |           |
|---|-----------|-----------|-----------|
| 6 | -1.261643 | 0.872152  | -1.254659 |
| 6 | -1.256383 | 0.895667  | 1.243185  |
| 1 | -1.289335 | 1.988228  | 1.190595  |
| 6 | 0.203096  | 0.388713  | 1.307952  |
| 1 | 0.357059  | -0.384345 | 2.059044  |
| 6 | -0.193741 | -1.512287 | -0.172565 |
| 1 | 0.061328  | -1.883166 | -1.163938 |
| 6 | 0.269050  | 0.679148  | -1.140644 |
| 1 | 0.784483  | 1.616950  | -0.940279 |
| 7 | 0.625340  | -0.261942 | -0.001357 |
| 7 | 1.996568  | -0.737831 | -0.000886 |
| 1 | -1.644766 | 0.369266  | -2.147269 |
| 1 | 0.221853  | -2.211277 | 0.550189  |
| 1 | -1.501325 | 1.933860  | -1.359141 |
| 1 | 0.719340  | 0.228058  | -2.023835 |
| 1 | -1.791834 | 0.604440  | 2.150918  |
| 1 | 0.914968  | 1.189024  | 1.499271  |
| 6 | 2.936023  | 0.358882  | 0.003347  |
| 1 | 2.896095  | 1.056209  | 0.871957  |
| 1 | 3.921619  | -0.112830 | 0.051840  |
| 1 | 2.956469  | 1.007776  | -0.900456 |

6 -1.933283 0.289968 0.000895  
1 -3.002603 0.514565 -0.000320  
6 -1.700954 -1.231168 0.013739  
1 -2.059706 -1.654138 0.956627  
1 -2.269990 -1.710650 -0.787006

#####

SP3-IV-1-CN b3lyp/6-311g(2d,d,p) if=57.0613

6 -1.331380 -0.914385 1.295497  
6 -1.268251 -1.073808 -1.196884  
1 -1.188527 -2.159867 -1.103477  
6 0.137330 -0.431129 -1.237705  
1 0.275002 0.252246 -2.074494  
6 -0.597552 1.557443 0.001562  
1 -0.395401 2.106162 0.919902  
6 0.137069 -0.430838 1.238515  
1 0.858207 -1.245591 1.187740  
7 0.375354 0.410869 0.000221  
7 1.701798 1.033885 -0.001294  
1 -1.839919 -0.479665 2.159879  
1 -0.297895 2.190069 -0.831501  
1 -1.364709 -1.999836 1.415484  
1 0.414779 0.210285 2.073335  
1 -1.797953 -0.869806 -2.130566  
1 0.945240 -1.161062 -1.263040  
6 -2.047685 -0.500037 -0.001158  
1 -3.072327 -0.877828 -0.002311  
6 -2.049295 1.035870 -0.100411  
1 -2.498900 1.347296 -1.046738  
1 -2.656774 1.466623 0.698995  
6 2.632217 0.096931 0.002795  
7 3.486343 -0.704655 -0.001281

#####

SP3-IV-1-COOH b3lyp/6-311g(2d,d,p) if=60.6410

6 1.766156 0.797740 1.307797  
6 1.702540 1.006686 -1.180460  
1 1.684513 2.092564 -1.054227  
6 0.262402 0.450845 -1.248596  
1 0.112238 -0.242209 -2.075804  
6 0.838816 -1.577767 0.004175  
1 0.611731 -2.097902 0.933324  
6 0.258818 0.458003 1.243562  
1 -0.384956 1.330767 1.181649

|   |           |           |           |
|---|-----------|-----------|-----------|
| 7 | -0.052291 | -0.361032 | -0.000718 |
| 7 | -1.398713 | -0.909279 | -0.001333 |
| 1 | 2.236304  | 0.296586  | 2.158502  |
| 1 | 0.480854  | -2.200432 | -0.812800 |
| 1 | 1.897645  | 1.872477  | 1.456192  |
| 1 | -0.076103 | -0.161968 | 2.073909  |
| 1 | 2.224830  | 0.801127  | -2.118453 |
| 1 | -0.496398 | 1.226534  | -1.291947 |
| 6 | 2.443658  | 0.356567  | -0.000336 |
| 1 | 3.494459  | 0.655129  | -0.001001 |
| 6 | 2.323531  | -1.171885 | -0.126265 |
| 1 | 2.725239  | -1.499039 | -1.089086 |
| 1 | 2.913129  | -1.665685 | 0.650017  |
| 6 | -2.338870 | 0.046254  | 0.000347  |
| 8 | -2.243654 | 1.284305  | -0.001705 |
| 8 | -3.584332 | -0.527146 | 0.001934  |
| 1 | -4.184864 | 0.228293  | 0.000917  |

#####

SP3-IV-1-H b3lyp/6-311g(2d,d,p) if=40.5878

|   |           |           |           |
|---|-----------|-----------|-----------|
| 6 | 1.093064  | 0.625513  | 1.300635  |
| 6 | 1.095187  | 0.802824  | -1.198361 |
| 1 | 1.440219  | 1.838020  | -1.123743 |
| 6 | -0.453482 | 0.740875  | -1.210276 |
| 1 | -0.867554 | 0.208976  | -2.064694 |
| 6 | -0.484367 | -1.406012 | -0.033127 |
| 1 | -0.894540 | -1.873913 | 0.859940  |
| 6 | -0.454781 | 0.679726  | 1.245296  |
| 1 | -0.838840 | 1.699855  | 1.209960  |
| 7 | -1.003613 | 0.004830  | -0.000418 |
| 7 | -2.432075 | -0.113927 | -0.006382 |
| 1 | 1.423012  | 0.036784  | 2.161218  |
| 1 | -0.976788 | -1.860965 | -0.890306 |
| 1 | 1.509064  | 1.629392  | 1.422805  |
| 1 | -0.947694 | 0.167976  | 2.069303  |
| 1 | 1.498389  | 0.398456  | -2.130788 |
| 1 | -0.916704 | 1.727036  | -1.178953 |
| 6 | 1.612366  | -0.012338 | -0.000021 |
| 1 | 2.705059  | -0.029690 | -0.000025 |
| 6 | 1.059745  | -1.444410 | -0.102805 |
| 1 | 1.388661  | -1.901650 | -1.040142 |
| 1 | 1.458604  | -2.059506 | 0.708192  |
| 1 | -2.737461 | 0.865840  | 0.036779  |

#####

SP3-IV-1-NH2 b3lyp/6-311g(2d,d,p) if=27.2694

|   |           |           |           |
|---|-----------|-----------|-----------|
| 6 | -1.264180 | -0.840644 | 1.277520  |
| 6 | -1.233718 | -0.951849 | -1.213672 |
| 1 | -1.321754 | -2.040446 | -1.149321 |
| 6 | 0.253614  | -0.519730 | -1.230494 |
| 1 | 0.497371  | 0.138451  | -2.063936 |
| 6 | -0.186646 | 1.532891  | 0.008304  |
| 1 | 0.104588  | 2.056426  | 0.917887  |
| 6 | 0.252820  | -0.528704 | 1.228946  |
| 1 | 0.878015  | -1.418830 | 1.183547  |
| 7 | 0.607863  | 0.270134  | 0.001723  |
| 7 | 2.039566  | 0.733352  | 0.000896  |
| 1 | -1.719207 | -0.377498 | 2.157746  |
| 1 | 0.187648  | 2.114171  | -0.833124 |
| 1 | -1.433929 | -1.918001 | 1.359582  |
| 1 | 0.592844  | 0.080824  | 2.065343  |
| 1 | -1.725210 | -0.645455 | -2.141206 |
| 1 | 0.949635  | -1.356774 | -1.242987 |
| 6 | -1.922860 | -0.298771 | -0.002925 |
| 1 | -2.992164 | -0.525679 | -0.005043 |
| 6 | -1.702215 | 1.225051  | -0.069254 |
| 1 | -2.125004 | 1.619899  | -0.997462 |
| 1 | -2.228957 | 1.716335  | 0.753256  |
| 7 | 2.823793  | -0.459521 | -0.002263 |
| 1 | 3.433260  | -0.472955 | -0.817425 |
| 1 | 3.423414  | -0.487698 | 0.820103  |

#####

SP3-IV-1-NO2 b3lyp/6-311g(2d,d,p) if=76.1898

|   |           |           |           |
|---|-----------|-----------|-----------|
| 6 | 1.759478  | 0.746152  | 1.325780  |
| 6 | 1.673166  | 1.031581  | -1.154396 |
| 1 | 1.633025  | 2.109119  | -0.974408 |
| 6 | 0.246017  | 0.451641  | -1.261372 |
| 1 | 0.142153  | -0.267749 | -2.073140 |
| 6 | 0.784945  | -1.569999 | 0.015709  |
| 1 | 0.582369  | -2.057905 | 0.967746  |
| 6 | 0.238165  | 0.479863  | 1.245497  |
| 1 | -0.358583 | 1.382507  | 1.173658  |
| 7 | -0.085801 | -0.332733 | -0.000738 |
| 7 | -1.439926 | -0.918420 | -0.002769 |
| 1 | 2.205177  | 0.186076  | 2.152382  |
| 1 | 0.397876  | -2.212465 | -0.771962 |
| 1 | 1.934504  | 1.805998  | 1.524882  |

1 -0.136997 -0.117567 2.075266  
1 2.200158 0.882583 -2.100027  
1 -0.520477 1.212936 -1.357654  
6 2.418329 0.335862 -0.002212  
1 3.473426 0.617210 -0.004811  
6 2.268211 -1.185924 -0.170538  
1 2.620739 -1.489953 -1.159740  
1 2.879146 -1.715969 0.563782  
7 -2.414222 0.019731 0.000865  
8 -2.171815 1.254451 -0.002995  
8 -3.553528 -0.435692 0.004459

#####

SP3-IV-1-OH b3lyp/6-311g(2d,d,p) if=80.1689

6 -1.199140 -0.944929 1.223747  
6 -1.242240 -0.854710 -1.269468  
1 -1.441812 -1.924884 -1.371391  
6 0.281793 -0.592875 -1.194290  
1 0.670347 -0.057511 -2.059980  
6 -0.187814 1.536207 -0.103457  
1 0.211546 2.195125 0.666437  
6 0.262537 -0.441271 1.266187  
1 1.000743 -1.233915 1.362874  
7 0.623314 0.284021 -0.010812  
7 2.028591 0.758500 0.004172  
1 -1.714785 -0.674120 2.148955  
1 0.053835 1.976082 -1.070351  
1 -1.235402 -2.035613 1.145602  
1 0.444249 0.285367 2.056588  
1 -1.670202 -0.364311 -2.148456  
1 0.865814 -1.501924 -1.063962  
6 -1.901179 -0.309451 0.010158  
1 -2.967988 -0.545673 0.017479  
6 -1.692402 1.216978 0.063682  
1 -2.266707 1.706687 -0.726880  
1 -2.063844 1.606987 1.015493  
8 2.805356 -0.474704 0.108416  
1 3.178695 -0.592005 -0.772607

#####

SP3-IV-2-CH3 b3lyp/6-311g(2d,d,p) if=117.7002

6 -1.272866 1.042241 -1.091391  
6 -1.293482 0.612439 1.371746  
1 -1.336751 1.698112 1.507771

|   |           |           |           |
|---|-----------|-----------|-----------|
| 6 | 0.165093  | 0.099705  | 1.368776  |
| 1 | 0.295859  | -0.826881 | 1.925357  |
| 6 | -0.212308 | -1.398577 | -0.535647 |
| 1 | 0.005448  | -1.462604 | -1.602317 |
| 6 | 0.262851  | 0.941261  | -0.944968 |
| 1 | 0.696908  | 1.833462  | -0.496099 |
| 7 | 0.622597  | -0.233518 | -0.044101 |
| 7 | 1.979957  | -0.714515 | -0.129667 |
| 1 | -1.597935 | 0.656718  | -2.060131 |
| 1 | 0.200954  | -2.278093 | -0.047256 |
| 1 | -1.597531 | 2.082982  | -1.023744 |
| 1 | 0.774217  | 0.743404  | -1.885687 |
| 1 | -1.846663 | 0.165022  | 2.202604  |
| 1 | 0.871198  | 0.829141  | 1.760321  |
| 6 | 2.926616  | 0.353206  | 0.094663  |
| 1 | 2.883490  | 0.861686  | 1.085224  |
| 1 | 3.911343  | -0.120085 | 0.049131  |
| 1 | 2.946475  | 1.168359  | -0.661413 |
| 7 | -1.631463 | -1.208660 | -0.259476 |
| 1 | -1.910203 | -1.772727 | 0.535904  |
| 6 | -1.923934 | 0.210396  | 0.022643  |
| 1 | -3.006279 | 0.354334  | 0.028113  |

#####

SP3-IV-2-CN b3lyp/6-311g(2d,d,p) if=75.0138

|   |           |           |           |
|---|-----------|-----------|-----------|
| 6 | 1.381728  | -0.769286 | -1.346680 |
| 6 | 1.281695  | -1.122238 | 1.127088  |
| 1 | 1.181994  | -2.192324 | 0.923309  |
| 6 | -0.102609 | -0.444868 | 1.239502  |
| 1 | -0.172933 | 0.252852  | 2.073094  |
| 6 | 0.620326  | 1.527396  | -0.050629 |
| 1 | 0.479501  | 1.973551  | -1.036667 |
| 6 | -0.129716 | -0.465653 | -1.230973 |
| 1 | -0.748337 | -1.355255 | -1.119157 |
| 7 | -0.375657 | 0.385121  | 0.001966  |
| 7 | -1.688389 | 1.018590  | 0.021876  |
| 1 | 1.837035  | -0.176307 | -2.142263 |
| 1 | 0.303232  | 2.244865  | 0.703416  |
| 1 | 1.540147  | -1.822723 | -1.584445 |
| 1 | -0.517790 | 0.116664  | -2.064337 |
| 1 | 1.820684  | -1.024423 | 2.072958  |
| 1 | -0.928360 | -1.150581 | 1.318668  |
| 7 | 1.975226  | 1.043018  | 0.162372  |
| 1 | 2.294471  | 1.291718  | 1.091926  |



6 2.052447 -0.422466 -0.010327  
1 3.102749 -0.717612 -0.020588  
6 -2.628213 0.089891 0.011277  
7 -3.489227 -0.703455 0.006435

#####

SP3-IV-2-COOH b3lyp/6-311g(2d,d,p) if=108.3893

6 1.803206 0.662499 1.347103  
6 1.713257 1.041365 -1.121884  
1 1.681423 2.112502 -0.901184  
6 0.286959 0.461192 -1.246052  
1 0.186457 -0.244944 -2.069993  
6 0.864546 -1.550007 0.053591  
1 0.703262 -1.976675 1.045016  
6 0.270933 0.492875 1.237292  
1 -0.277131 1.423538 1.123595  
7 -0.052538 -0.337107 0.001767  
7 -1.385483 -0.900622 -0.008698  
1 2.214673 0.025550 2.133056  
1 0.487424 -2.250249 -0.688197  
1 2.048754 1.696846 1.595611  
1 -0.156420 -0.062156 2.070709  
1 2.245130 0.924314 -2.070089  
1 -0.484393 1.221139 -1.329916  
7 2.249094 -1.174490 -0.179442  
1 2.527646 -1.434053 -1.119225  
6 2.439137 0.279532 0.003919  
1 3.508910 0.495467 0.009048  
6 -2.331029 0.050492 -0.004716  
8 -2.234086 1.287601 -0.001967  
8 -3.574351 -0.525261 -0.010267  
1 -4.177800 0.227842 -0.011463

#####

SP3-IV-2-H b3lyp/6-311g(2d,d,p) if=138.9417

6 1.075415 1.382393 -0.393027  
6 1.145874 -1.070244 -0.896234  
1 1.457391 -0.812871 -1.913669  
6 -0.394346 -1.191228 -0.790090  
1 -0.728234 -2.069764 -0.240594  
6 -0.466398 -0.039021 1.380531  
1 -0.773483 0.917348 1.805188  
6 -0.443151 1.259089 -0.663449  
1 -0.684404 1.197578 -1.726087

7 -0.993134 -0.013182 -0.036733  
7 -2.414510 -0.059468 0.084825  
1 1.273576 2.137349 0.370876  
1 -1.015204 -0.832054 1.884190  
1 1.610317 1.678566 -1.298179  
1 -1.037188 2.057294 -0.223725  
1 1.620455 -2.024350 -0.649350  
1 -0.894451 -1.197781 -1.757907  
7 0.980140 -0.235950 1.421175  
1 1.192362 -1.185998 1.705428  
6 1.587425 0.020927 0.100243  
1 2.673394 0.039199 0.212399  
1 -2.730909 0.084181 -0.881288

#####

SP3-IV-2-NH2 b3lyp/6-311g(2d,d,p) if=126.5351

6 1.294157 -0.767286 -1.289076  
6 1.251372 -0.929437 1.203061  
1 1.313810 -2.016598 1.089449  
6 -0.217884 -0.448652 1.264601  
1 -0.393437 0.286010 2.050121  
6 0.209229 1.497825 -0.158900  
1 0.005321 1.861270 -1.166864  
6 -0.245194 -0.642345 -1.183298  
1 -0.754508 -1.588665 -1.011952  
7 -0.607107 0.246518 -0.015204  
7 -2.018601 0.721902 -0.018087  
1 1.672406 -0.193056 -2.137764  
1 -0.201219 2.212143 0.553315  
1 1.591825 -1.808457 -1.434323  
1 -0.696089 -0.163057 -2.050902  
1 1.770924 -0.675207 2.131575  
1 -0.939733 -1.255016 1.381087  
7 1.631463 1.229880 0.060394  
1 1.912373 1.586034 0.967367  
6 1.913847 -0.220421 0.004709  
1 2.996420 -0.364061 0.003255  
7 -2.815324 -0.465964 0.043864  
1 -3.425798 -0.423053 0.856914  
1 -3.418468 -0.522741 -0.774632

#####

SP3-IV-2-NO2 b3lyp/6-311g(2d,d,p) if=106.1092

6 -1.783404 -0.644743 1.348832

6 -1.696070 -1.033484 -1.119870  
1 -1.664886 -2.102120 -0.888307  
6 -0.269909 -0.457702 -1.261315  
1 -0.187210 0.270168 -2.068086  
6 -0.813341 1.543705 0.073394  
1 -0.657573 1.939952 1.077695  
6 -0.246407 -0.523080 1.234053  
1 0.264981 -1.471350 1.113470  
7 0.088152 0.307807 0.001009  
7 1.423863 0.909106 -0.012962  
1 -2.175028 0.010160 2.129939  
1 -0.420391 2.257175 -0.647124  
1 -2.054789 -1.669592 1.608336  
1 0.202919 0.009335 2.070918  
1 -2.231095 -0.925202 -2.066982  
1 0.493943 -1.217927 -1.385851  
7 -2.195020 1.192090 -0.184126  
1 -2.456655 1.457019 -1.127228  
6 -2.412511 -0.257661 0.003355  
1 -3.485368 -0.455621 0.008004  
7 2.405284 -0.022775 -0.005391  
8 2.163054 -1.256999 -0.003777  
8 3.542578 0.436024 -0.006872

#####

SP3-IV-2-OH b3lyp/6-311g(2d,d,p) if=136.2754

6 1.259910 -0.867982 -1.232951  
6 1.229690 -0.840603 1.265816  
1 1.267661 -1.934018 1.226980  
6 -0.226287 -0.323308 1.309227  
1 -0.371389 0.489479 2.019283  
6 0.211235 1.484192 -0.296181  
1 0.019078 1.744154 -1.338059  
6 -0.277429 -0.739462 -1.116274  
1 -0.771771 -1.669748 -0.843966  
7 -0.622064 0.259767 -0.029978  
7 -2.011123 0.747368 -0.038755  
1 1.625896 -0.353059 -2.123901  
1 -0.192762 2.271519 0.338952  
1 1.557064 -1.916244 -1.310363  
1 -0.744442 -0.349603 -2.019830  
1 1.764520 -0.535185 2.169569  
1 -0.967708 -1.090423 1.519377  
7 1.625079 1.221573 -0.041052

1 1.903266 1.644653 0.837536  
6 1.893268 -0.231804 0.013318  
1 2.973939 -0.386490 0.016205  
8 -2.795958 -0.469440 0.164944  
1 -3.181250 -0.646661 -0.700568

#####

SP3-IV-3-CH3 b3lyp/6-311g(2d,d,p) if=118.3806

7 -0.613277 0.220239 0.119990  
7 -1.963974 0.672652 0.316704  
7 1.220477 -0.213338 -1.470882  
1 1.505307 0.616352 -1.980560  
7 1.658998 1.098289 0.477028  
1 1.972889 1.069626 1.442033  
6 -0.155485 -0.890995 1.057186  
1 -0.883588 -1.694477 0.969519  
1 -0.231281 -0.469135 2.058064  
6 1.275633 -1.335916 0.679958  
1 1.276405 -2.272072 0.115497  
1 1.875710 -1.494115 1.579320  
6 0.240798 1.436826 0.404084  
1 -0.146914 1.857366 1.329120  
1 0.013548 2.128152 -0.407908  
6 -0.232042 -0.228349 -1.294605  
1 -0.734511 0.457670 -1.974469  
1 -0.639960 -1.231291 -1.424960  
6 -2.915722 -0.319539 -0.131384  
1 -2.873727 -1.313421 0.369876  
1 -3.899317 0.091887 0.111036  
1 -2.938046 -0.533548 -1.222249  
6 1.890951 -0.212691 -0.172945  
1 2.963118 -0.353911 -0.317968

#####

SP3-IV-3-CN b3lyp/6-311g(2d,d,p) if=77.4517

6 0.101152 -0.434325 -1.225076  
1 0.070288 0.268028 -2.059994  
6 0.070832 -0.444703 1.233761  
1 0.724807 -1.310698 1.123232  
7 0.354042 0.430338 0.012247  
7 1.666585 1.054225 0.039183  
1 0.391647 0.129690 2.101110  
1 0.961328 -1.092150 -1.340008  
6 -0.655460 1.541550 -0.019913

1 -0.307793 2.232182 -0.785021  
1 -0.585138 2.044398 0.943858  
6 -2.049858 0.939859 -0.305953  
1 -2.355174 1.111533 -1.340640  
1 -2.799548 1.400790 0.340018  
6 -1.973148 -0.572251 -0.028577  
1 -2.960236 -1.035273 -0.036065  
7 -1.138940 -1.177323 -1.062227  
1 -0.953811 -2.144604 -0.819713  
7 -1.340811 -0.812647 1.289906  
1 -1.821714 -0.286160 2.012555  
6 2.604280 0.121742 0.012939  
7 3.466060 -0.670161 -0.013740

#####

SP3-IV-3-COOH b3lyp/6-311g(2d,d,p) if=105.7276

6 0.302608 0.471087 -1.232862  
1 0.309438 -0.236185 -2.064289  
6 0.314328 0.459430 1.237607  
1 -0.253849 1.378429 1.123310  
7 -0.040151 -0.379712 0.002550  
7 -1.375812 -0.930900 0.016365  
1 -0.061853 -0.094262 2.096559  
1 -0.499364 1.192720 -1.351324  
6 0.887086 -1.565949 -0.037225  
1 0.487031 -2.224938 -0.804119  
1 0.777676 -2.068853 0.922987  
6 2.325513 -1.078782 -0.319840  
1 2.614150 -1.257437 -1.358297  
1 3.035256 -1.612246 0.315796  
6 2.371392 0.427153 -0.013516  
1 3.392831 0.809772 -0.009322  
7 1.590768 1.115971 -1.035695  
1 1.468444 2.085918 -0.764813  
7 1.756662 0.683838 1.310117  
1 2.179924 0.082610 2.010436  
6 -2.313870 0.029256 0.005184  
8 -2.205966 1.265654 -0.017738  
8 -3.560725 -0.535081 0.016359  
1 -4.158767 0.222336 0.004653

#####

SP3-IV-3-H b3lyp/6-311g(2d,d,p) if=176.6052

6 0.412837 -0.658965 -1.236093

1 0.665214 0.006991 -2.062638  
6 0.391181 -0.716802 1.204057  
1 0.697967 -1.758347 1.071035  
7 0.984253 0.021363 0.007659  
7 2.405046 0.133841 0.022231  
1 0.900754 -0.312630 2.076548  
1 0.960739 -1.592074 -1.358185  
6 0.431904 1.417214 0.018618  
1 1.001631 1.950919 -0.739063  
1 0.698524 1.833102 0.989190  
6 -1.089975 1.379303 -0.246112  
1 -1.328104 1.692041 -1.265766  
1 -1.612954 2.054428 0.435025  
6 -1.570229 -0.065880 -0.024293  
1 -2.659212 -0.132699 -0.028637  
7 -1.027675 -0.889490 -1.101920  
1 -1.214979 -1.863490 -0.889324  
7 -1.067765 -0.581779 1.271408  
1 -1.330347 0.051644 2.020620  
1 2.709435 -0.846646 0.058488

#####

SP3-IV-3-NH2 b3lyp/6-311g(2d,d,p) if=135.7371

6 0.222172 -0.486944 -1.228656  
1 0.306254 0.227744 -2.049496  
6 0.193747 -0.553048 1.211167  
1 0.746503 -1.485259 1.099312  
7 0.588692 0.292941 0.017585  
7 1.999297 0.760192 0.043830  
1 0.565323 -0.023267 2.087633  
1 0.981998 -1.258489 -1.336291  
6 -0.246411 1.529161 0.026564  
1 0.192507 2.182020 -0.725853  
1 -0.095198 1.996206 0.999286  
6 -1.717677 1.143518 -0.252605  
1 -2.012085 1.398511 -1.273699  
1 -2.388152 1.676626 0.425442  
6 -1.855701 -0.376455 -0.039494  
1 -2.900782 -0.690377 -0.056050  
7 -1.124166 -1.050036 -1.109480  
1 -1.077118 -2.040138 -0.892166  
7 -1.261549 -0.772044 1.258956  
1 -1.673347 -0.221159 2.006409  
7 2.794181 -0.434029 -0.012095

1 3.431933 -0.372036 -0.802249  
1 3.370195 -0.506947 0.824289

#####

SP3-IV-3-NO2 b3lyp/6-311g(2d,d,p) if=103.4929

6 0.287971 -0.458443 1.252996  
1 0.300823 0.277046 2.059268  
6 0.293870 -0.508199 -1.230342  
1 -0.238985 -1.442863 -1.095291  
7 -0.077038 0.349166 -0.006891  
7 -1.417341 0.939808 -0.019958  
1 -0.103423 0.012331 -2.100606  
1 -0.500462 -1.185016 1.414172  
6 0.828039 1.559184 0.001102  
1 0.416083 2.234745 0.746952  
1 0.716947 2.030553 -0.974440  
6 2.272446 1.106072 0.304816  
1 2.547785 1.307265 1.342553  
1 2.975053 1.645480 -0.333363  
6 2.349569 -0.402466 0.020442  
1 3.377329 -0.766652 0.022780  
7 1.578576 -1.090220 1.051162  
1 1.470835 -2.066983 0.799903  
7 1.740544 -0.684197 -1.301072  
1 2.147514 -0.079368 -2.007737  
7 -2.390636 -0.002781 -0.006589  
8 -3.531660 0.444058 -0.012376  
8 -2.135790 -1.234789 0.014270

#####

SP3-IV-3-OH b3lyp/6-311g(2d,d,p) if=137.1698

6 0.233422 -0.490351 -1.233691  
1 0.302665 0.219385 -2.060292  
6 0.222115 -0.540977 1.213440  
1 0.776610 -1.470480 1.098632  
7 0.604572 0.307992 0.007679  
7 1.987655 0.786912 0.037289  
1 0.605966 -0.009346 2.082474  
1 0.998840 -1.255364 -1.343514  
6 -0.246005 1.536851 0.012374  
1 0.179707 2.193906 -0.744499  
1 -0.099952 2.006790 0.984002  
6 -1.711596 1.130552 -0.265188  
1 -2.006601 1.368378 -1.290128

1 -2.387529 1.667048 0.404385  
6 -1.834165 -0.387239 -0.029792  
1 -2.876205 -0.710566 -0.038348  
7 -1.101187 -1.068671 -1.095272  
1 -1.042890 -2.055518 -0.866564  
7 -1.230165 -0.757771 1.269958  
1 -1.641248 -0.201059 2.013207  
8 2.769410 -0.456824 0.098647  
1 3.226605 -0.470836 -0.748971

#####

SP3-IV-4-CH3 b3lyp/6-311g(2d,d,p) if=101.9524

7 -0.625420 0.305637 -0.014043  
7 -1.893285 0.729023 -0.011537  
7 0.223063 1.489839 -0.062085  
1 -0.279591 2.088414 -0.711986  
1 1.608192 -1.353815 1.878652  
6 1.588107 1.137945 -0.503546  
1 2.272424 1.852576 -0.038024  
1 1.714660 1.188232 -1.591484  
6 1.856152 -0.290675 -0.003722  
1 2.924197 -0.513409 -0.012507  
1 -0.967559 -1.282864 -1.213795  
1 -0.650264 0.100260 1.965969  
6 -2.857708 -0.357056 0.013934  
1 -2.697388 -1.095041 0.815126  
1 -3.832076 0.105376 0.183102  
1 -2.951523 -0.918209 -0.936696  
7 -0.218347 -0.598480 -1.188408  
7 -0.196788 -0.479904 1.263012  
1 0.979063 -2.231868 -0.432283  
6 1.079635 -1.251746 -0.913391  
1 1.591141 -1.385529 -1.872300  
1 1.607115 0.417164 2.034822  
6 1.276657 -0.420817 1.410531

#####

SP3-IV-4-CN b3lyp/6-311g(2d,d,p) if=74.5051

7 -0.343117 0.403099 -0.006192  
7 -1.610224 1.014741 -0.004280  
7 0.610424 1.475666 -0.254496  
1 0.160747 2.019045 -0.987043  
1 1.634240 -1.279273 2.005692  
6 1.911120 0.891127 -0.659808



|   |           |           |           |
|---|-----------|-----------|-----------|
| 1 | 2.695165  | 1.551750  | -0.282487 |
| 1 | 2.013922  | 0.804028  | -1.746732 |
| 6 | 1.984216  | -0.496397 | -0.001861 |
| 1 | 3.004603  | -0.879750 | -0.007026 |
| 1 | -1.032537 | -1.188758 | -0.978944 |
| 1 | -0.393480 | 0.477573  | 1.959614  |
| 7 | -0.182907 | -0.628819 | -1.051684 |
| 7 | -0.023983 | -0.210359 | 1.307365  |
| 1 | 0.823839  | -2.329356 | -0.188169 |
| 6 | 1.035377  | -1.426932 | -0.771557 |
| 1 | 1.459639  | -1.720040 | -1.735065 |
| 1 | 1.918515  | 0.476476  | 1.944205  |
| 6 | 1.447637  | -0.368682 | 1.431032  |
| 6 | -2.573558 | 0.104539  | 0.013817  |
| 7 | -3.466393 | -0.647703 | 0.001604  |

#####

SP3-IV-4-COOH b3lyp/6-311g(2d,d,p) if=97.9920

|   |           |           |           |
|---|-----------|-----------|-----------|
| 7 | 0.020397  | -0.349204 | -0.045961 |
| 7 | 1.320918  | -0.886476 | -0.083361 |
| 7 | -0.853606 | -1.455295 | -0.444786 |
| 1 | -0.358115 | -1.864812 | -1.232240 |
| 1 | -2.086173 | 0.882303  | 2.142973  |
| 6 | -2.189728 | -0.921337 | -0.793635 |
| 1 | -2.923981 | -1.685442 | -0.526424 |
| 1 | -2.290884 | -0.690154 | -1.859638 |
| 6 | -2.372782 | 0.351668  | 0.047496  |
| 1 | -3.419885 | 0.653431  | 0.083938  |
| 1 | 0.596858  | 1.392351  | -0.743988 |
| 1 | 0.057144  | -0.719002 | 1.881246  |
| 7 | -0.215476 | 0.793105  | -0.949833 |
| 7 | -0.349127 | 0.038014  | 1.336596  |
| 1 | -1.353271 | 2.272917  | 0.123585  |
| 6 | -1.493602 | 1.442431  | -0.577939 |
| 1 | -1.939218 | 1.832048  | -1.497134 |
| 1 | -2.239658 | -0.865879 | 1.847419  |
| 6 | -1.829772 | 0.071659  | 1.456055  |
| 6 | 2.291937  | 0.046804  | -0.010456 |
| 8 | 2.233994  | 1.282541  | -0.010049 |
| 8 | 3.505649  | -0.569165 | 0.048612  |
| 1 | 4.141985  | 0.156883  | 0.054055  |

#####

SP3-IV-4-H b3lyp/6-311g(2d,d,p) if=216.2134

|   |           |           |           |
|---|-----------|-----------|-----------|
| 7 | -0.998257 | -0.002398 | 0.011524  |
| 7 | -2.332535 | -0.051554 | 0.046670  |
| 7 | -0.480741 | -1.343273 | 0.258185  |
| 1 | -1.103790 | -1.687903 | 0.983592  |
| 1 | 1.528486  | 0.782093  | -2.026444 |
| 6 | 0.937419  | -1.281790 | 0.674743  |
| 1 | 1.416713  | -2.200774 | 0.326482  |
| 1 | 1.062285  | -1.209721 | 1.761266  |
| 6 | 1.547958  | -0.047438 | -0.011996 |
| 1 | 2.637247  | -0.106381 | -0.019214 |
| 1 | -0.930396 | 1.759082  | 0.994123  |
| 1 | -1.019606 | -0.051131 | -1.956903 |
| 7 | -0.352852 | 0.927155  | 1.078272  |
| 7 | -0.421152 | 0.466638  | -1.316889 |
| 1 | 1.204258  | 2.094703  | 0.129664  |
| 6 | 1.061474  | 1.197502  | 0.743859  |
| 1 | 1.611396  | 1.327260  | 1.682065  |
| 1 | 1.091535  | -0.939888 | -1.941264 |
| 6 | 0.992416  | 0.029554  | -1.440132 |
| 1 | -2.634973 | 0.869724  | -0.276552 |

#####

SP3-IV-4-NH2 b3lyp/6-311g(2d,d,p) if=141.0034

|   |           |           |           |
|---|-----------|-----------|-----------|
| 7 | -0.589705 | 0.289973  | 0.012921  |
| 7 | -1.920866 | 0.739264  | 0.064464  |
| 7 | 0.217994  | 1.464580  | -0.269775 |
| 1 | -0.326894 | 1.934329  | -0.988529 |
| 1 | 1.711601  | -1.092650 | 1.978133  |
| 6 | 1.558047  | 1.033495  | -0.730729 |
| 1 | 2.276383  | 1.792139  | -0.408362 |
| 1 | 1.618832  | 0.932368  | -1.820494 |
| 6 | 1.842635  | -0.319929 | -0.055991 |
| 1 | 2.902710  | -0.570905 | -0.114611 |
| 1 | -1.138226 | -1.353837 | -0.862661 |
| 1 | -0.528096 | 0.426936  | 1.974444  |
| 7 | -0.331855 | -0.738279 | -1.006628 |
| 7 | -0.111966 | -0.258905 | 1.348630  |
| 1 | 0.896993  | -2.279159 | -0.125871 |
| 6 | 0.973014  | -1.381193 | -0.751217 |
| 1 | 1.395177  | -1.665408 | -1.719708 |
| 1 | 1.760294  | 0.682629  | 1.873272  |
| 6 | 1.370545  | -0.226931 | 1.401565  |
| 7 | -2.742946 | -0.438001 | -0.020948 |
| 1 | -3.229274 | -0.586276 | 0.860974  |

1 -3.449536 -0.263240 -0.729009  
#####  
SP3-IV-4-NO2 b3lyp/6-311g(2d,d,p) if=97.3811

7 0.044490 0.333249 0.038689  
7 1.367930 0.914999 0.077284  
7 -0.807926 1.493055 0.297114  
1 -0.335924 1.966039 1.063994  
1 -1.995571 -1.117714 -2.051759  
6 -2.169023 1.019965 0.648196  
1 -2.875646 1.758874 0.263147  
1 -2.314031 0.919564 1.728916  
6 -2.344525 -0.340424 -0.043762  
1 -3.394243 -0.632330 -0.077880  
1 0.577995 -1.322182 0.930681  
1 0.144326 0.506879 -1.913697  
7 -0.219526 -0.689378 1.059258  
7 -0.278286 -0.185681 -1.300021  
1 -1.355852 -2.271166 0.140730  
6 -1.502418 -1.360951 0.732680  
1 -1.976450 -1.629307 1.679913  
1 -2.147198 0.653677 -1.969461  
6 -1.756632 -0.232306 -1.457852  
7 2.362179 -0.018031 0.006076  
8 2.145748 -1.251616 0.012164  
8 3.482522 0.465675 -0.052035

#####  
SP3-IV-4-OH b3lyp/6-311g(2d,d,p) if=124.2627

7 -0.602521 0.294037 0.011969  
7 -1.919479 0.759649 0.055113  
7 0.203765 1.466751 -0.279304  
1 -0.329254 1.926338 -1.013324  
1 1.689663 -1.080003 1.990695  
6 1.550919 1.038017 -0.722592  
1 2.262294 1.798472 -0.390010  
1 1.624050 0.940004 -1.811790  
6 1.830290 -0.314236 -0.047349  
1 2.891083 -0.562792 -0.097904  
1 -1.115807 -1.392158 -0.825001  
1 -0.579437 0.377052 1.983423  
7 -0.345967 -0.749792 -1.010275  
7 -0.132467 -0.271079 1.339175  
1 0.903461 -2.280373 -0.140836

6 0.973408 -1.375954 -0.755507  
1 1.402000 -1.643727 -1.725604  
1 1.724049 0.694842 1.876659  
6 1.345766 -0.220731 1.406648  
8 -2.731137 -0.457662 0.095393  
1 -3.248611 -0.375891 -0.713406

#####

SP3-IV-5-CH3 b3lyp/6-311g(2d,d,p) if=92.7395

7 -0.630050 0.210873 -0.118291  
7 -1.897782 0.612912 -0.365597  
6 1.323388 -0.999921 -1.020055  
1 1.619851 -0.546947 -1.970346  
1 1.739325 -2.011280 -0.965283  
6 1.864422 -0.158732 0.145098  
1 2.941526 -0.276887 0.270487  
6 -0.195570 -0.043647 1.333531  
1 -0.896007 -0.756616 1.756989  
1 -0.323100 0.924001 1.823817  
6 -2.894374 -0.310854 0.153172  
1 -2.969228 -0.363136 1.256737  
1 -3.859733 0.056029 -0.201160  
1 -2.785731 -1.345549 -0.210331  
7 -0.151921 -1.089732 -0.843880  
1 -0.615297 -0.949999 -1.740624  
7 0.253722 1.268480 -0.729736  
1 -0.243936 2.130981 -0.512246  
7 1.551517 1.250989 -0.119975  
1 1.549825 1.729880 0.783288  
7 1.171987 -0.534508 1.397463  
1 1.173015 -1.544657 1.498304

#####

SP3-IV-5-CN b3lyp/6-311g(2d,d,p) if=62.0739

7 0.363159 0.347495 0.007705  
7 1.621123 0.974854 -0.023473  
6 -1.477872 -0.293288 1.412287  
1 -1.894052 0.592086 1.900054  
1 -1.750437 -1.183090 1.984238  
6 -2.011961 -0.403109 -0.024204  
1 -3.056427 -0.712685 -0.050753  
6 0.118424 -0.757759 -1.024247  
1 0.934290 -1.469588 -0.922104  
1 0.194308 -0.251078 -1.988231

7 0.010482 -0.255248 1.307571  
1 0.410079 0.406607 1.970325  
7 -0.631052 1.462899 -0.189889  
1 -0.201225 2.056012 -0.899011  
7 -1.870293 0.914067 -0.660530  
1 -1.850985 0.758939 -1.670549  
7 -1.183178 -1.355571 -0.794349  
1 -1.084853 -2.228419 -0.285578  
6 2.608736 0.088974 0.011231  
7 3.529093 -0.628166 0.025995

#####

SP3-IV-5-COOH b3lyp/6-311g(2d,d,p) if=83.9531

7 0.041381 -0.293770 -0.002513  
7 1.324723 -0.855187 0.026943  
6 -1.837752 0.190483 -1.416213  
1 -2.180033 -0.724803 -1.906830  
1 -2.175851 1.056077 -1.990768  
6 -2.394789 0.259264 0.014444  
1 -3.461182 0.485191 0.026706  
6 -0.309219 0.780870 1.040543  
1 0.451974 1.548467 0.945073  
1 -0.214100 0.263769 1.997482  
7 -0.352291 0.272598 -1.302552  
1 0.098687 -0.359438 -1.960646  
7 -0.877209 -1.488647 0.185344  
1 -0.400931 -2.050957 0.889514  
7 -2.154809 -1.042471 0.654424  
1 -2.150080 -0.881493 1.663770  
7 -1.651605 1.271089 0.791615  
1 -1.611701 2.147237 0.280264  
6 2.320986 0.062331 -0.004428  
8 2.288446 1.291348 -0.026348  
8 3.521562 -0.591876 -0.000503  
1 4.176462 0.117208 -0.008661

#####

SP3-IV-5-H b3lyp/6-311g(2d,d,p) if=236.2625

7 -0.990958 0.029025 -0.036549  
7 -2.335727 0.063062 0.105692  
6 1.074703 1.371291 -0.114064  
1 1.177465 1.923010 0.824777  
1 1.694786 1.851087 -0.877814  
6 1.533146 -0.082005 0.087080

1 2.617907 -0.163044 0.165578  
6 -0.391601 -1.072048 -0.907110  
1 -0.891947 -1.001616 -1.870153  
1 -0.684323 -2.001411 -0.414500  
7 -0.325446 1.305928 -0.615217  
1 -0.905829 2.009726 -0.161527  
7 -0.416261 -0.048220 1.354613  
1 -1.055426 -0.684536 1.828849  
7 0.912347 -0.592426 1.315320  
1 0.896352 -1.611740 1.236804  
7 1.052935 -0.923844 -1.033120  
1 1.276511 -0.473544 -1.915193  
1 -2.701211 0.013963 -0.847436

#####

SP3-IV-5-NH2 b3lyp/6-311g(2d,d,p) if=123.5522

7 -0.609509 -0.177538 -0.148172  
7 -1.924761 -0.519579 -0.489026  
6 1.385692 -0.913067 1.046752  
1 1.712377 -1.882034 0.657952  
1 1.812256 -0.766480 2.043622  
6 1.855039 0.209572 0.109881  
1 2.928964 0.385063 0.184942  
6 -0.259816 1.300292 -0.025786  
1 -0.988030 1.716412 0.663190  
1 -0.429602 1.704746 -1.026208  
7 -0.095575 -0.784788 1.143910  
1 -0.541528 -1.699309 1.096856  
7 0.233446 -0.825472 -1.204036  
1 -0.299449 -0.663500 -2.057774  
7 1.516615 -0.176168 -1.267148  
1 1.463730 0.690089 -1.807440  
7 1.118573 1.457050 0.414127  
1 1.144060 1.635267 1.413238  
7 -2.795127 0.295843 0.321273  
1 -3.475796 0.721543 -0.301638  
1 -3.318105 -0.308006 0.951685

#####

SP3-IV-5-NO2 b3lyp/6-311g(2d,d,p) if=93.3650

7 -0.072676 -0.274453 0.021019  
7 -1.366318 -0.888055 0.020108  
6 1.782984 0.354729 1.392654  
1 2.108275 -0.496907 1.996149

1 2.117888 1.281300 1.864108  
6 2.362675 0.246058 -0.026313  
1 3.430875 0.460483 -0.049383  
6 0.300518 0.651811 -1.149048  
1 -0.448667 1.433782 -1.180247  
1 0.221658 0.010830 -2.029315  
7 0.299337 0.434033 1.245441  
1 -0.169289 -0.099576 1.974254  
7 0.832751 -1.499211 -0.010025  
1 0.366379 -2.139992 -0.651934  
7 2.118536 -1.121265 -0.507558  
1 2.134639 -1.088701 -1.528782  
7 1.639815 1.160430 -0.933919  
1 1.600009 2.093978 -0.537237  
7 -2.388218 0.026797 0.003106  
8 -2.185184 1.254405 0.002531  
8 -3.499994 -0.484245 -0.006103

#####

SP3-IV-5-OH b3lyp/6-311g(2d,d,p) if=125.4522

7 0.620600 0.246001 0.020584  
7 1.935292 0.737163 0.009839  
6 -1.355084 -0.191749 1.389126  
1 -1.693103 0.733457 1.864688  
1 -1.763758 -1.044631 1.939078  
6 -1.836063 -0.234903 -0.068303  
1 -2.908607 -0.418444 -0.140436  
6 0.275361 -0.831772 -0.999309  
1 1.008130 -1.619951 -0.867141  
1 0.434970 -0.348699 -1.965131  
7 0.129945 -0.322243 1.348896  
1 0.558329 0.343028 1.990441  
7 -0.232812 1.457305 -0.186200  
1 0.278280 1.989421 -0.890519  
7 -1.519364 1.057184 -0.692773  
1 -1.481885 0.893968 -1.701136  
7 -1.095362 -1.279386 -0.809683  
1 -1.109842 -2.149820 -0.287590  
8 2.779822 -0.439136 -0.068345  
1 3.065536 -0.586875 0.840782

#####

SP3-IV-6-CN b3lyp/6-311g(2d,d,p) if=70.6198

7 0.352902 0.379930 -0.029300

7 1.603657 0.984810 -0.062941  
1 -1.692778 -0.934895 1.965126  
1 -0.889535 -2.300636 0.106918  
6 -1.977516 -0.408729 0.048766  
1 -3.018999 -0.724970 0.099505  
1 0.209338 0.814828 1.864426  
7 -0.644998 1.457084 -0.362685  
1 -0.221630 1.917682 -1.168911  
7 -1.871922 0.831437 -0.754394  
1 -1.802617 0.539511 -1.731051  
7 -1.514105 -0.105278 1.402984  
1 1.018305 -1.296377 -0.859348  
6 -1.063573 -1.474800 -0.592271  
7 -0.029444 -0.039732 1.359217  
1 -1.488504 -1.877725 -1.515859  
7 0.170173 -0.736986 -0.948968  
6 2.573471 0.081568 0.007067  
7 3.461184 -0.674931 0.032920

#####

SP3-IV-6-COOH b3lyp/6-311g(2d,d,p) if=92.8299

7 0.028577 -0.330377 0.051088  
7 1.310986 -0.865220 0.103793  
1 -2.095499 0.674366 -2.018455  
1 -1.411123 2.223607 -0.275254  
6 -2.355139 0.268499 -0.072816  
1 -3.417090 0.501837 -0.149369  
1 -0.094476 -0.957326 -1.782256  
7 -0.894752 -1.456841 0.472899  
1 -0.435775 -1.819965 1.308675  
7 -2.162553 -0.894333 0.825624  
1 -2.109795 -0.517338 1.773901  
7 -1.865821 -0.102623 -1.402555  
1 0.580044 1.434771 0.686870  
6 -1.522480 1.438204 0.482801  
7 -0.380226 -0.071024 -1.364020  
1 -1.979115 1.877238 1.374839  
7 -0.233751 0.833637 0.887522  
6 2.287542 0.064124 0.009172  
8 2.220629 1.298936 -0.021333  
8 3.497916 -0.549887 -0.028812  
1 4.137705 0.172929 -0.053183

#####

SP3-IV-6-H b3lyp/6-311g(2d,d,p) if=206.8973



7 -0.994110 -0.034267 -0.040327  
7 -2.316732 -0.061849 -0.013247  
1 1.512775 1.684125 -1.056725  
1 1.299845 -0.551028 -1.938932  
6 1.507931 0.079127 0.136972  
1 2.588037 0.155053 0.268375  
1 -0.937856 1.909233 -0.244764  
7 -0.483891 0.105526 1.361262  
1 -1.068575 -0.553043 1.875404  
7 0.884537 -0.323658 1.419653  
1 0.908790 -1.345049 1.436749  
1 -2.615641 0.034997 -0.985686  
7 0.993476 1.397871 -0.229115  
1 -0.854276 -1.425501 -1.484384  
6 1.116735 -0.958264 -0.936492  
7 -0.390954 1.204638 -0.740606  
1 1.688325 -1.886968 -0.829232  
7 -0.302243 -1.252119 -0.649574

#####

SP3-IV-6-NH2 b3lyp/6-311g(2d,d,p) if=137.8848

7 0.608145 0.272964 -0.029830  
7 1.907430 0.702459 -0.016784  
1 -1.743078 -0.704437 1.935000  
1 -0.954955 -2.223707 0.222769  
6 -1.823796 -0.234863 -0.006810  
1 -2.897517 -0.425394 -0.025827  
1 0.362664 0.838747 1.838890  
7 -0.238108 1.435604 -0.430108  
1 0.262247 1.804758 -1.238702  
7 -1.523972 0.944270 -0.852822  
1 -1.437126 0.587929 -1.806828  
7 -1.425273 0.076082 1.363448  
1 1.115940 -1.475216 -0.693982  
6 -1.001821 -1.433081 -0.536859  
7 0.055585 -0.035769 1.411843  
1 -1.438849 -1.852002 -1.449036  
7 0.314886 -0.866670 -0.886400  
7 2.733567 -0.480602 0.040292  
1 3.458002 -0.364980 -0.661891  
1 3.200545 -0.516390 0.944146

#####

SP3-IV-6-NO2 b3lyp/6-311g(2d,d,p) if=97.4700

|   |           |           |           |
|---|-----------|-----------|-----------|
| 7 | 0.056326  | -0.313966 | 0.042881  |
| 7 | 1.352911  | -0.895526 | 0.102687  |
| 1 | -2.001830 | 0.918419  | -1.946085 |
| 1 | -1.407089 | 2.237316  | 0.010194  |
| 6 | -2.323870 | 0.260337  | -0.078122 |
| 1 | -3.386393 | 0.487272  | -0.161187 |
| 1 | 0.005916  | -0.718341 | -1.853788 |
| 7 | -0.856196 | -1.505922 | 0.292311  |
| 1 | -0.419609 | -1.964437 | 1.093397  |
| 7 | -2.139219 | -1.005636 | 0.669940  |
| 1 | -2.126837 | -0.756844 | 1.660706  |
| 7 | -1.783289 | 0.071239  | -1.426168 |
| 1 | 0.555555  | 1.357553  | 0.909544  |
| 6 | -1.530534 | 1.358378  | 0.653917  |
| 7 | -0.299850 | 0.106716  | -1.335883 |
| 1 | -2.019649 | 1.667962  | 1.581635  |
| 7 | -0.241874 | 0.720506  | 1.016965  |
| 7 | 2.354577  | 0.035322  | 0.009393  |
| 8 | 3.473336  | -0.445844 | -0.029003 |
| 8 | 2.129496  | 1.267054  | -0.015256 |

#####

SP3-IV-6-OH b3lyp/6-311g(2d,d,p) if=123.4128

|   |           |           |           |
|---|-----------|-----------|-----------|
| 7 | 0.625925  | 0.279400  | -0.019682 |
| 7 | 1.904849  | 0.718704  | 0.006723  |
| 1 | -1.747763 | -0.785078 | 1.900801  |
| 1 | -0.941279 | -2.227952 | 0.099520  |
| 6 | -1.810092 | -0.229609 | -0.019549 |
| 1 | -2.883968 | -0.415803 | -0.050415 |
| 1 | 0.395250  | 0.689289  | 1.906654  |
| 7 | -0.229527 | 1.465015  | -0.346595 |
| 1 | 0.263190  | 1.888579  | -1.133297 |
| 7 | -1.505850 | 0.991362  | -0.802759 |
| 1 | -1.414816 | 0.688160  | -1.774489 |
| 7 | -1.410288 | 0.011291  | 1.363170  |
| 1 | 1.105035  | -1.455416 | -0.768142 |
| 6 | -0.992285 | -1.399149 | -0.616138 |
| 7 | 0.065731  | -0.138912 | 1.409339  |
| 1 | -1.434008 | -1.765933 | -1.547914 |
| 7 | 0.328352  | -0.819156 | -0.942409 |
| 8 | 2.709349  | -0.501558 | 0.135824  |
| 1 | 3.343480  | -0.384764 | -0.579695 |

#####

SP3-IV-7-CH3 b3lyp/6-311g(2d,d,p) if=90.1237

|   |           |           |           |
|---|-----------|-----------|-----------|
| 7 | -0.648980 | 0.256189  | -0.099332 |
| 7 | -1.888017 | 0.656090  | -0.174958 |
| 1 | 1.573701  | -1.845087 | -1.071868 |
| 1 | 1.170105  | -1.678811 | 1.333145  |
| 6 | 1.820369  | -0.204359 | 0.048926  |
| 1 | 2.895207  | -0.388584 | 0.088432  |
| 1 | -0.552358 | -0.604204 | -1.865683 |
| 7 | 0.236428  | 1.354985  | -0.623504 |
| 1 | -0.218894 | 2.202550  | -0.286330 |
| 7 | 1.546750  | 1.231378  | -0.062205 |
| 1 | 1.577870  | 1.600760  | 0.890634  |
| 7 | 1.274995  | -0.873527 | -1.122991 |
| 7 | -0.203728 | -0.953842 | -0.971709 |
| 1 | -0.211541 | 0.666973  | 1.840354  |
| 7 | 1.192368  | -0.661554 | 1.308503  |
| 7 | -0.163467 | -0.220900 | 1.339792  |
| 6 | -2.860040 | -0.384841 | 0.152281  |
| 1 | -2.682440 | -0.847510 | 1.131149  |
| 1 | -3.837446 | 0.099392  | 0.170502  |
| 1 | -2.900627 | -1.192001 | -0.592743 |

#####

SP3-IV-7-CN b3lyp/6-311g(2d,d,p) if=68.8071

|   |           |           |           |
|---|-----------|-----------|-----------|
| 7 | 0.366320  | 0.332259  | 0.072797  |
| 7 | 1.603997  | 0.914784  | 0.125629  |
| 1 | -1.590430 | -1.747704 | 1.367124  |
| 1 | -1.088652 | -1.962834 | -1.041266 |
| 6 | -1.983361 | -0.381385 | -0.053887 |
| 1 | -3.021868 | -0.709346 | -0.094155 |
| 1 | 0.365291  | -0.161937 | 1.949567  |
| 7 | -0.622680 | 1.444048  | 0.360136  |
| 1 | -0.233175 | 2.250448  | -0.128612 |
| 7 | -1.886988 | 1.075032  | -0.193628 |
| 1 | -1.928651 | 1.274584  | -1.195369 |
| 7 | -1.415542 | -0.753611 | 1.237579  |
| 7 | 0.067646  | -0.678343 | 1.120515  |
| 1 | 0.102319  | 0.379858  | -1.898138 |
| 7 | -1.228472 | -0.964584 | -1.184672 |
| 7 | 0.075282  | -0.376117 | -1.214868 |
| 6 | 2.606022  | 0.044101  | -0.012083 |
| 7 | 3.563180  | -0.607662 | -0.118249 |

#####

SP3-IV-7-COOH b3lyp/6-311g(2d,d,p) if=70.5891

|   |           |           |           |
|---|-----------|-----------|-----------|
| 7 | 0.047455  | -0.289140 | -0.082017 |
| 7 | 1.303121  | -0.825200 | -0.137790 |
| 1 | -2.038033 | 1.724589  | -1.268840 |
| 1 | -1.545772 | 1.823057  | 1.145396  |
| 6 | -2.351997 | 0.256551  | 0.062045  |
| 1 | -3.408484 | 0.520206  | 0.112950  |
| 1 | 0.026947  | 0.326909  | -1.921756 |
| 7 | -0.882843 | -1.443112 | -0.459611 |
| 1 | -0.436438 | -2.250891 | -0.024738 |
| 7 | -2.167138 | -1.196659 | 0.112044  |
| 1 | -2.197524 | -1.461434 | 1.099133  |
| 7 | -1.798605 | 0.737926  | -1.198816 |
| 7 | -0.313730 | 0.765297  | -1.065412 |
| 1 | -0.261994 | -0.521270 | 1.862963  |
| 7 | -1.637701 | 0.812847  | 1.232659  |
| 7 | -0.308157 | 0.291331  | 1.250034  |
| 6 | 2.313473  | 0.092278  | 0.004388  |
| 8 | 2.282123  | 1.304466  | 0.086122  |
| 8 | 3.496196  | -0.594559 | 0.030399  |
| 1 | 4.169070  | 0.093574  | 0.106498  |

#####

SP3-IV-7-H b3lyp/6-311g(2d,d,p) if=194.6807

|   |           |           |           |
|---|-----------|-----------|-----------|
| 7 | 0.998268  | 0.048172  | 0.046788  |
| 7 | 2.312947  | 0.010023  | 0.011999  |
| 1 | -1.619149 | 1.908237  | 0.127559  |
| 1 | -1.304296 | 0.265836  | 1.916936  |
| 6 | -1.496187 | -0.077369 | -0.105828 |
| 1 | -2.582755 | -0.139607 | -0.179734 |
| 1 | 0.824163  | 1.829619  | -0.755170 |
| 7 | 0.473674  | -0.545563 | -1.237649 |
| 1 | 1.105712  | -1.327329 | -1.407238 |
| 7 | -0.862022 | -1.018464 | -1.033196 |
| 1 | -0.863698 | -1.925283 | -0.560176 |
| 1 | 2.618302  | 0.409387  | 0.899986  |
| 7 | -1.074415 | 1.272718  | -0.451511 |
| 7 | 0.320548  | 1.447137  | 0.046134  |
| 1 | 0.615542  | -1.573670 | 1.151784  |
| 7 | -1.071668 | -0.473648 | 1.257395  |
| 7 | 0.357425  | -0.595085 | 1.280187  |

#####

SP3-IV-7-NH2 b3lyp/6-311g(2d,d,p) if=99.7512

7 -0.629262 0.194897 -0.102141  
7 -1.904888 0.623133 -0.213836  
1 1.591232 -1.940555 -0.857848  
1 1.197045 -1.489733 1.519832  
6 1.823770 -0.175764 0.059070  
1 2.901211 -0.338904 0.110103  
1 -0.594477 -0.877166 -1.733615  
7 0.203102 1.249081 -0.777544  
1 -0.279629 2.115443 -0.539536  
7 1.522385 1.231792 -0.223883  
1 1.553593 1.715961 0.676377  
7 1.272436 -0.987335 -1.018583  
7 -0.202741 -1.082690 -0.814025  
1 -0.236607 0.870860 1.736678  
7 1.208764 -0.483157 1.369415  
7 -0.161060 -0.064672 1.336907  
7 -2.784154 -0.443742 0.184292  
1 -3.227008 -0.185571 1.063270  
1 -3.520051 -0.476902 -0.513893

#####

SP3-IV-7-NO2 b3lyp/6-311g(2d,d,p) if=79.1943

7 -0.074208 -0.273996 0.091990  
7 -1.339514 -0.864586 0.166495  
1 2.020865 1.718903 1.263935  
1 1.494350 1.824789 -1.155527  
6 2.315143 0.255523 -0.079334  
1 3.371039 0.516869 -0.144967  
1 -0.040689 0.323749 1.934926  
7 0.855214 -1.445739 0.465123  
1 0.405140 -2.254625 0.034207  
7 2.124032 -1.197464 -0.130154  
1 2.142831 -1.466017 -1.116225  
7 1.778992 0.733113 1.190213  
7 0.292274 0.763681 1.076140  
1 0.195675 -0.519735 -1.850981  
7 1.583289 0.814019 -1.238812  
7 0.255345 0.290344 -1.236378  
7 -2.376940 0.053438 -0.009119  
8 -2.173638 1.262566 -0.074615  
8 -3.472543 -0.485907 -0.065116

#####

SP3-IV-7-OH b3lyp/6-311g(2d,d,p) if=115.9010

7 -0.637127 0.202736 -0.102610  
 7 -1.919525 0.629394 -0.239849  
 1 1.637445 -1.839677 -1.004385  
 1 1.129321 -1.640066 1.375683  
 6 1.806828 -0.173314 0.093414  
 1 2.882084 -0.331934 0.184632  
 1 -0.489113 -0.608814 -1.875691  
 7 0.204015 1.338483 -0.638535  
 1 -0.280678 2.171641 -0.303140  
 7 1.505298 1.254767 -0.049228  
 1 1.505939 1.639430 0.898123  
 7 1.322544 -0.875454 -1.087348  
 7 -0.160297 -0.976727 -0.982222  
 1 -0.383581 0.631029 1.818070  
 7 1.130026 -0.623146 1.330060  
 7 -0.243206 -0.222311 1.279529  
 8 -2.766582 -0.405250 0.284989  
 1 -3.121818 -0.833918 -0.502263

Table S2. The bond length (Å) of N-N ylide bond at the B3LYP/6-311G(2d,d,p) level.

| Bond length           | N <sup>-1</sup> NH | N <sup>-3</sup> NCH <sub>3</sub> | N <sup>-1</sup> NOH | N <sup>-1</sup> NNH <sub>2</sub> | N <sup>-1</sup> NCOOH | N <sup>-1</sup> NCN | N <sup>-1</sup> NNO <sub>2</sub> |
|-----------------------|--------------------|----------------------------------|---------------------|----------------------------------|-----------------------|---------------------|----------------------------------|
| sp <sup>2</sup> -I-1  | 1.31               | 1.31                             | 1.31                | 1.32                             | 1.36                  | 1.35                | 1.39                             |
| sp <sup>2</sup> -I-2  | 1.30               | 1.30                             | 1.30                | 1.30                             | 1.34                  | 1.34                | 1.36                             |
| sp <sup>2</sup> -I-3  | 1.27               | 1.28                             | 1.28                | 1.28                             | 1.30                  | 1.31                | 1.29                             |
| sp <sup>2</sup> -I-4  | 1.26               | 1.26                             | 1.27                | 1.27                             | 1.26                  | 1.29                | 1.28                             |
| sp <sup>2</sup> -I-5  | 1.26               | 1.27                             | 1.27                | 1.27                             | 1.30                  | 1.29                | 1.27                             |
| sp <sup>2</sup> -I-6  | 1.25               | 1.24                             | 1.25                | 1.26                             | 1.25                  | 1.27                | 1.25                             |
| sp <sup>2</sup> -II-1 | 1.30               | 1.31                             | 1.30                | 1.30                             | 1.34                  | 1.34                | 1.35                             |
| sp <sup>2</sup> -II-2 | 1.31               | 1.32                             | 1.31                | 1.31                             | 1.37                  | 1.36                | 1.38                             |
| sp <sup>2</sup> -II-3 | 1.28               | 1.27                             | 1.29                | 1.29                             | 1.32                  | 1.31                | 1.33                             |
| sp <sup>2</sup> -II-4 | 1.29               | 1.28                             | 1.28                | 1.30                             | 1.31                  | 1.31                | 1.33                             |
| sp <sup>2</sup> -II-5 | 1.27               | 1.27                             | 1.27                | 1.26                             | 1.29                  | 1.30                | 1.32                             |
| sp <sup>3</sup> -I-1  | 1.44               | 1.47                             | 1.52                | 1.57                             | 1.47                  | 1.48                | 1.49                             |
| sp <sup>3</sup> -I-2  | 1.45               | 1.47                             | 1.51                | 1.56                             | 1.46                  | 1.48                | 1.49                             |
| sp <sup>3</sup> -I-3  | 1.43               | 1.46                             | 1.49                | 1.52                             | 1.45                  | 1.46                | 1.48                             |
| sp <sup>3</sup> -I-4  | 1.34               | 1.34                             | 1.39                | 1.39                             | 1.40                  | 1.41                | 1.44                             |
| sp <sup>3</sup> -I-5  | -                  | -                                | -                   | -                                | 1.41                  | 1.41                | 1.43                             |
| sp <sup>3</sup> -I-6  | -                  | -                                | -                   | -                                | 1.40                  | 1.38                | 1.44                             |
| sp <sup>3</sup> -II-1 | 1.43               | 1.45                             | 1.48                | 1.51                             | 1.45                  | 1.47                | 1.48                             |
| sp <sup>3</sup> -II-2 | 1.44               | 1.46                             | 1.47                | 1.51                             | 1.45                  | 1.47                | 1.47                             |
| sp <sup>3</sup> -II-3 | 1.44               | 1.44                             | 1.46                | 1.50                             | 1.45                  | 1.47                | 1.47                             |
| sp <sup>3</sup> -II-4 | 1.33               | -                                | -                   | -                                | 1.41                  | 1.40                | 1.43                             |

|                        |      |      |      |      |      |      |      |
|------------------------|------|------|------|------|------|------|------|
| sp <sup>3</sup> -II-5  | -    | -    | -    | -    | 1.39 | 1.39 | 1.40 |
| sp <sup>3</sup> -III-1 | 1.43 | 1.45 | 1.48 | 1.51 | 1.45 | 1.46 | 1.48 |
| sp <sup>3</sup> -III-2 | 1.43 | 1.45 | 1.48 | 1.51 | 1.45 | 1.46 | 1.47 |
| sp <sup>3</sup> -III-3 | 1.43 | 1.45 | 1.48 | 1.50 | 1.45 | 1.46 | 1.47 |
| sp <sup>3</sup> -III-4 | 1.33 | 1.35 | 1.40 | 1.38 | 1.39 | 1.39 | 1.43 |
| sp <sup>3</sup> -III-5 | 1.32 | -    | -    | -    | 1.40 | 1.39 | 1.42 |
| sp <sup>3</sup> -III-6 | -    | -    | -    | -    | 1.38 | 1.37 | 1.42 |
| sp <sup>3</sup> -III-7 | -    | -    | -    | -    | 1.38 | 1.37 | 1.41 |
| sp <sup>3</sup> -IV-1  | 1.43 | 1.45 | 1.48 | 1.50 | 1.45 | 1.47 | 1.48 |
| sp <sup>3</sup> -IV-2  | 1.43 | 1.44 | 1.47 | 1.49 | 1.45 | 1.46 | 1.46 |
| sp <sup>3</sup> -IV-3  | 1.43 | 1.44 | 1.46 | 1.49 | 1.44 | 1.45 | 1.46 |
| sp <sup>3</sup> -IV-4  | 1.34 | 1.37 | 1.40 | 1.41 | 1.41 | 1.41 | 1.45 |
| sp <sup>3</sup> -IV-5  | 1.35 | 1.38 | 1.40 | 1.40 | 1.40 | 1.41 | 1.43 |
| sp <sup>3</sup> -IV-6  | 1.32 | -    | 1.35 | 1.37 | 1.39 | 1.39 | 1.42 |
| sp <sup>3</sup> -IV-7  | 1.32 | 1.30 | 1.36 | 1.35 | 1.37 | 1.37 | 1.40 |

\* The bond lengths of N<sub>2</sub>H<sub>2</sub>, H<sub>3</sub>NNH and N<sub>2</sub>H<sub>4</sub> are 1.24, 1.46 and 1.49 Å, respectively.

Table S3. The bond dissociation energy (BDE) (kJ/mol) of N-N ylide bond at the CBS-QB3 level.

| Bond dissociation energy | Bond               |                                  |                     |                                  |                       |                     |                                  |
|--------------------------|--------------------|----------------------------------|---------------------|----------------------------------|-----------------------|---------------------|----------------------------------|
|                          | N- <sup>1</sup> NH | N- <sup>3</sup> NCH <sub>3</sub> | N- <sup>1</sup> NOH | N- <sup>1</sup> NNH <sub>2</sub> | N- <sup>1</sup> NCOOH | N- <sup>1</sup> NCN | N- <sup>1</sup> NNO <sub>2</sub> |
| sp <sup>2</sup> -I-1     | 341.21             | 140.33                           | 158.11              | 25.69                            | 253.47                | 259.07              | 177.78                           |
| sp <sup>2</sup> -I-2     | 392.12             | 155.10                           | 187.82              | 84.39                            | 264.30                | 279.53              | 181.00                           |
| sp <sup>2</sup> -I-3     | 354.26             | 215.81                           | 173.76              | 42.01                            | 253.01                | 257.86              | 169.66                           |
| sp <sup>2</sup> -I-4     | 413.04             | 241.33                           | 211.50              | 111.88                           | 261.21                | 284.09              | 189.87                           |
| sp <sup>2</sup> -I-5     | 437.52             | 187.19                           | 241.21              | 143.34                           | 278.82                | 294.43              | 205.56                           |
| sp <sup>2</sup> -I-6     | 409.24             | 235.39                           | 211.29              | 119.37                           | 250.71                | 260.66              | 169.49                           |
| sp <sup>2</sup> -II-1    | 426.27             | 135.69                           | 232.76              | 140.79                           | 258.82                | 261.83              | 175.31                           |
| sp <sup>2</sup> -II-2    | 358.95             | 88.78                            | 185.10              | 53.05                            | 267.65                | 280.96              | 211.63                           |
| sp <sup>2</sup> -II-3    | 311.92             | 143.13                           | 136.15              | 4.48                             | 249.37                | 249.53              | 196.27                           |
| sp <sup>2</sup> -II-4    | 353.55             | 179.66                           | 158.99              | 36.94                            | 257.11                | 246.23              | 166.69                           |
| sp <sup>2</sup> -II-5    | 349.74             | 154.22                           | 159.37              | 29.25                            | 237.53                | 241.25              | 158.95                           |
| sp <sup>3</sup> -I-1     | 291.33             | 70.17                            | 107.61              | -17.36                           | 268.99                | 262.04              | 203.51                           |
| sp <sup>3</sup> -I-2     | 290.79             | 72.05                            | 105.94              | -18.70                           | 268.82                | 259.37              | 203.59                           |
| sp <sup>3</sup> -I-3     | 292.71             | 65.40                            | 101.75              | -22.43                           | 263.34                | 254.60              | 194.56                           |
| sp <sup>3</sup> -I-4     | 323.13             | 102.34                           | 113.89              | -16.74                           | 238.07                | 253.09              | 171.00                           |
| sp <sup>3</sup> -I-5     | -                  | -                                | -                   | -                                | 266.56                | 254.64              | 193.80                           |
| sp <sup>3</sup> -I-6     | -                  | -                                | -                   | -                                | 232.09                | 214.89              | 140.08                           |
| sp <sup>3</sup> -II-1    | 288.91             | 71.17                            | 107.49              | -17.24                           | 270.04                | 260.96              | 205.31                           |
| sp <sup>3</sup> -II-2    | 287.32             | 66.07                            | 102.72              | -24.43                           | 271.92                | 257.19              | 208.70                           |
| sp <sup>3</sup> -II-3    | 304.64             | 70.50                            | 129.79              | 3.05                             | 297.02                | 277.52              | 231.88                           |
| sp <sup>3</sup> -II-4    | 304.76             | -                                | -                   | -                                | 266.94                | 250.20              | 197.19                           |
| sp <sup>3</sup> -II-5    | -                  | -                                | -                   | -                                | 277.57                | 257.57              | 202.05                           |
| sp <sup>3</sup> -III-1   | 290.91             | 72.51                            | 104.73              | -19.83                           | 269.95                | 259.49              | 204.22                           |

|                        |        |       |        |        |        |        |        |
|------------------------|--------|-------|--------|--------|--------|--------|--------|
| sp <sup>3</sup> -III-2 | 283.38 | 66.36 | 95.27  | -28.53 | 261.96 | 248.61 | 195.39 |
| sp <sup>3</sup> -III-3 | 278.15 | 61.21 | 88.70  | -35.40 | 250.58 | 236.69 | 183.51 |
| sp <sup>3</sup> -III-4 | 310.29 | 91.04 | 92.97  | -31.13 | 224.10 | 232.09 | 152.17 |
| sp <sup>3</sup> -III-5 | 292.34 | -     | -      | -      | 239.20 | 220.29 | 165.69 |
| sp <sup>3</sup> -III-6 | -      | -     | -      | -      | 235.85 | 213.34 | 156.94 |
| sp <sup>3</sup> -III-7 | -      | -     | -      | -      | 229.07 | 204.01 | 148.49 |
| sp <sup>3</sup> -IV-1  | 295.10 | 77.70 | 109.91 | -15.82 | 276.23 | 266.02 | 212.51 |
| sp <sup>3</sup> -IV-2  | 291.88 | 75.27 | 104.18 | -21.05 | 272.75 | 260.08 | 208.20 |
| sp <sup>3</sup> -IV-3  | 287.52 | 67.40 | 97.82  | -26.28 | 264.18 | 250.71 | 198.32 |
| sp <sup>3</sup> -IV-4  | 298.40 | 79.66 | 97.65  | -16.90 | 255.64 | 239.87 | 178.24 |
| sp <sup>3</sup> -IV-5  | 298.32 | 77.11 | 94.64  | -29.12 | 242.34 | 235.85 | 167.57 |
| sp <sup>3</sup> -IV-6  | 287.86 | -     | 80.75  | -29.58 | 241.17 | 220.16 | 185.56 |
| sp <sup>3</sup> -IV-7  | 301.83 | 82.38 | 78.37  | -42.22 | 209.91 | 211.58 | 159.62 |

\* The bond dissociation energies of N<sub>2</sub>H<sub>2</sub>, H<sub>3</sub>NNH and N<sub>2</sub>H<sub>4</sub> are 853.12, 198.41 and 259.24 kJ/mol, respectively.

Table S4. Calculated detoanation properties of title structures at the B3LYP/6-311G(2d,d,p) level.

| $\Delta H_{f,solid}$ (kJ/mol) | R: H   | R: CH <sub>3</sub> | R: OH  | R: NH <sub>2</sub> | R: COOH | R: CN   | R: NO <sub>2</sub> |
|-------------------------------|--------|--------------------|--------|--------------------|---------|---------|--------------------|
| sp <sup>2</sup> -I-1          | 450.65 | 506.40             | 399.26 | 565.38             | 44.40   | 533.76  | 413.67             |
| sp <sup>2</sup> -I-2          | 450.96 | 511.05             | 392.64 | 559.11             | 74.87   | 562.65  | 450.50             |
| sp <sup>2</sup> -I-3          | 493.99 | 562.20             | 443.07 | 578.55             | 152.68  | 619.32  | 534.74             |
| sp <sup>2</sup> -I-4          | 545.64 | 600.37             | 495.05 | 618.45             | 218.94  | 689.76  | 600.32             |
| sp <sup>2</sup> -I-5          | 744.01 | 808.58             | 703.56 | 805.56             | 425.92  | 902.55  | 811.24             |
| sp <sup>2</sup> -I-6          | 884.99 | 935.20             | 828.56 | 937.37             | 572.77  | 1060.88 | 961.72             |
| sp <sup>2</sup> -II-1         | 438.61 | 477.38             | 367.67 | 537.64             | 34.18   | 514.69  | 381.27             |
| sp <sup>2</sup> -II-2         | 469.94 | 507.11             | 412.82 | 577.05             | 28.94   | 520.17  | 369.39             |
| sp <sup>2</sup> -II-3         | 524.36 | 587.88             | 485.41 | 645.07             | 141.97  | 644.11  | 523.41             |
| sp <sup>2</sup> -II-4         | 617.96 | 681.62             | 571.77 | 737.34             | 234.93  | 724.82  | 604.12             |
| sp <sup>2</sup> -II-5         | 726.86 | 801.55             | 704.46 | 853.67             | 368.20  | 856.12  | 737.81             |
| sp <sup>3</sup> -I-1          | 613.47 | 679.43             | 549.77 | 709.03             | 140.73  | 637.48  | 487.68             |
| sp <sup>3</sup> -I-2          | 644.01 | 708.46             | 586.03 | 742.25             | 173.80  | 671.52  | 520.18             |
| sp <sup>3</sup> -I-3          | 621.04 | 697.33             | 567.37 | 727.44             | 159.42  | 653.59  | 507.44             |
| sp <sup>3</sup> -I-4          | 779.16 | 845.99             | 746.80 | 913.07             | 375.18  | 844.72  | 727.48             |
| sp <sup>3</sup> -I-5          | -      | -                  | -      | -                  | 494.08  | 986.75  | 845.42             |
| sp <sup>3</sup> -I-6          | -      | -                  | -      | -                  | 578.23  | 1075.73 | 947.43             |
| sp <sup>3</sup> -II-1         | 584.93 | 688.40             | 519.47 | 679.14             | 109.64  | 607.18  | 455.93             |
| sp <sup>3</sup> -II-2         | 601.09 | 664.81             | 537.47 | 701.65             | 125.09  | 621.63  | 470.48             |
| sp <sup>3</sup> -II-3         | 674.95 | 736.45             | 610.88 | 773.85             | 200.92  | 702.23  | 545.71             |
| sp <sup>3</sup> -II-4         | 742.67 | -                  | -      | -                  | 307.23  | 809.21  | 659.71             |
| sp <sup>3</sup> -II-5         | -      | -                  | -      | -                  | 433.62  | 939.15  | 788.72             |
| sp <sup>3</sup> -III-1        | 732.17 | 796.80             | 676.06 | 835.37             | 262.37  | 760.08  | 609.21             |
| sp <sup>3</sup> -III-2        | 809.01 | 873.55             | 757.07 | 913.66             | 343.82  | 842.70  | 691.91             |
| sp <sup>3</sup> -III-3        | 875.71 | 776.2              | 823.79 | 981.49             | 416.47  | 913.58  | 764.10             |
| sp <sup>3</sup> -III-4        | 929.30 | 997.24             | 910.04 | 1067.68            | 531.06  | 1005.22 | 889.44             |



|                                              |         |         |         |         |        |         |         |
|----------------------------------------------|---------|---------|---------|---------|--------|---------|---------|
| sp <sup>3</sup> -III-5                       | 1113.75 | -       | -       | -       | 686.31 | 1183.28 | 1040.45 |
| sp <sup>3</sup> -III-6                       | -       | -       | -       | -       | 775.70 | 1272.27 | 1135.12 |
| sp <sup>3</sup> -III-7                       | -       | -       | -       | -       | 915.93 | 1412.84 | 1276.21 |
| sp <sup>3</sup> -IV-1                        | 676.56  | 740.54  | 618.98  | 777.97  | 204.02 | 703.43  | 551.27  |
| sp <sup>3</sup> -IV-2                        | 693.57  | 756.98  | 640.33  | 798.13  | 224.12 | 724.35  | 571.55  |
| sp <sup>3</sup> -IV-3                        | 709.34  | 776.71  | 658.06  | 815.46  | 244.40 | 743.31  | 591.76  |
| sp <sup>3</sup> -IV-4                        | 895.95  | 961.67  | 858.06  | 1007.08 | 453.64 | 956.77  | 815.11  |
| sp <sup>3</sup> -IV-5                        | 924.77  | 992.92  | 886.89  | 1047.20 | 494.53 | 984.05  | 851.88  |
| sp <sup>3</sup> -IV-6                        | 1079.05 | -       | 1046.70 | 1193.05 | 646.30 | 1149.83 | 1008.93 |
| sp <sup>3</sup> -IV-7                        | 1132.50 | 1215.12 | 1118.50 | 1273.15 | 740.44 | 1217.95 | 1103.15 |
| 2,4,6-trinitrotoluene (TNT)                  |         |         |         |         | 77.57  |         |         |
| 1,3,5-Trinitro-1,3,5-triazinane (RDX)        |         |         |         |         | 118.53 |         |         |
| 1,3,5,7-Tetranitro-1,3,5,7-tetrazocane (HMX) |         |         |         |         | 163.31 |         |         |

| $\rho$ (g/cm <sup>3</sup> ) | R: H | R: CH <sub>3</sub> | R: OH | R: NH <sub>2</sub> | R: COOH | R: CN | R: NO <sub>2</sub> |
|-----------------------------|------|--------------------|-------|--------------------|---------|-------|--------------------|
| sp <sup>2</sup> -I-1        | 1.25 | 1.19               | 1.33  | 1.25               | 1.49    | 1.37  | 1.54               |
| sp <sup>2</sup> -I-2        | 1.36 | 1.26               | 1.46  | 1.38               | 1.52    | 1.43  | 1.59               |
| sp <sup>2</sup> -I-3        | 1.39 | 1.36               | 1.57  | 1.45               | 1.60    | 1.52  | 1.6                |
| sp <sup>2</sup> -I-4        | 1.61 | 1.37               | 1.62  | 1.55               | 1.65    | 1.57  | 1.66               |
| sp <sup>2</sup> -I-5        | 1.54 | 1.47               | 1.73  | 1.69               | 1.71    | 1.63  | 1.73               |
| sp <sup>2</sup> -I-6        | 1.59 | 1.49               | 1.77  | 1.73               | 1.74    | 1.67  | 1.76               |
| sp <sup>2</sup> -II-1       | 1.65 | 1.10               | 1.26  | 1.17               | 1.38    | 1.26  | 1.44               |
| sp <sup>2</sup> -II-2       | 1.20 | 1.23               | 1.35  | 1.27               | 1.59    | 1.46  | 1.66               |
| sp <sup>2</sup> -II-3       | 1.32 | 1.33               | 1.49  | 1.37               | 1.56    | 1.46  | 1.63               |
| sp <sup>2</sup> -II-4       | 1.38 | 1.41               | 1.57  | 1.46               | 1.69    | 1.58  | 1.77               |
| sp <sup>2</sup> -II-5       | 1.50 | 1.48               | 1.66  | 1.57               | 1.78    | 1.69  | 1.85               |
| sp <sup>3</sup> -I-1        | 1.08 | 1.07               | 1.16  | 1.11               | 1.29    | 1.21  | 1.34               |
| sp <sup>3</sup> -I-2        | 1.17 | 1.16               | 1.24  | 1.19               | 1.38    | 1.31  | 1.45               |
| sp <sup>3</sup> -I-3        | 1.34 | 1.3                | 1.42  | 1.34               | 1.53    | 1.49  | 1.63               |
| sp <sup>3</sup> -I-4        | 1.27 | 1.23               | 1.38  | 1.31               | 1.5     | 1.44  | 1.58               |
| sp <sup>3</sup> -I-5        | -    | -                  | -     | -                  | 1.59    | 1.58  | 1.72               |
| sp <sup>3</sup> -I-6        | -    | -                  | -     | -                  | 1.69    | 1.67  | 1.82               |
| sp <sup>3</sup> -II-1       | 1.09 | 1.08               | 1.18  | 1.12               | 1.31    | 1.23  | 1.39               |
| sp <sup>3</sup> -II-2       | 1.17 | 1.16               | 1.27  | 1.19               | 1.40    | 1.34  | 1.48               |
| sp <sup>3</sup> -II-3       | 1.31 | 1.28               | 1.4   | 1.31               | 1.51    | 1.46  | 1.62               |
| sp <sup>3</sup> -II-4       | 1.31 | -                  | -     | -                  | 1.54    | 1.46  | 1.64               |
| sp <sup>3</sup> -II-5       | -    | -                  | -     | -                  | 1.57    | 1.51  | 1.68               |
| sp <sup>3</sup> -III-1      | 1.21 | 1.19               | 1.28  | 1.22               | 1.39    | 1.33  | 1.46               |
| sp <sup>3</sup> -III-2      | 1.32 | 1.29               | 1.38  | 1.32               | 1.49    | 1.44  | 1.56               |
| sp <sup>3</sup> -III-3      | 1.42 | 1.30               | 1.49  | 1.42               | 1.59    | 1.56  | 1.69               |
| sp <sup>3</sup> -III-4      | 1.42 | 1.35               | 1.50  | 1.44               | 1.61    | 1.57  | 1.70               |
| sp <sup>3</sup> -III-5      | 1.48 | -                  | -     | -                  | 1.67    | 1.75  | 1.79               |
| sp <sup>3</sup> -III-6      | -    | -                  | -     | -                  | 1.73    | 1.75  | 1.86               |
| sp <sup>3</sup> -III-7      | -    | -                  | -     | -                  | 1.79    | 1.83  | 1.94               |

|                                              |      |      |      |      |      |      |      |
|----------------------------------------------|------|------|------|------|------|------|------|
| sp <sup>3</sup> -IV-1                        | 1.13 | 1.12 | 1.21 | 1.16 | 1.32 | 1.20 | 1.37 |
| sp <sup>3</sup> -IV-2                        | 1.24 | 1.22 | 1.31 | 1.26 | 1.42 | 1.36 | 1.49 |
| sp <sup>3</sup> -IV-3                        | 1.34 | 1.30 | 1.4  | 1.34 | 1.51 | 1.46 | 1.59 |
| sp <sup>3</sup> -IV-4                        | 1.3  | 1.26 | 1.38 | 1.31 | 1.48 | 1.41 | 1.55 |
| sp <sup>3</sup> -IV-5                        | 1.44 | 1.38 | 1.52 | 1.44 | 1.61 | 1.58 | 1.71 |
| sp <sup>3</sup> -IV-6                        | 1.49 | -    | 1.57 | 1.49 | 1.65 | 1.62 | 1.76 |
| sp <sup>3</sup> -IV-7                        | 1.61 | 1.52 | 1.69 | 1.61 | 1.80 | 1.78 | 1.89 |
| 2,4,6-trinitrotoluene (TNT)                  |      |      |      |      |      | 1.63 |      |
| 1,3,5-Trinitro-1,3,5-triazinane (RDX)        |      |      |      |      |      | 1.77 |      |
| 1,3,5,7-Tetranitro-1,3,5,7-tetrazocane (HMX) |      |      |      |      |      | 1.80 |      |

| D (km/s)               | R: H  | R: CH <sub>3</sub> | R: OH | R: NH <sub>2</sub> | R: COOH | R: CN | R: NO <sub>2</sub> |
|------------------------|-------|--------------------|-------|--------------------|---------|-------|--------------------|
| sp <sup>2</sup> -I-1   | 5.43  | 5.25               | 6.03  | 5.96               | 5.59    | 5.46  | 6.81               |
| sp <sup>2</sup> -I-2   | 6.17  | 5.85               | 6.72  | 6.65               | 5.98    | 5.97  | 7.24               |
| sp <sup>2</sup> -I-3   | 6.74  | 6.62               | 7.48  | 7.24               | 6.61    | 6.67  | 7.78               |
| sp <sup>2</sup> -I-4   | 7.51  | 7.03               | 8.05  | 7.95               | 7.21    | 7.27  | 8.41               |
| sp <sup>2</sup> -I-5   | 8.79  | 8.16               | 8.95  | 9.24               | 8.20    | 8.21  | 9.36               |
| sp <sup>2</sup> -I-6   | 9.68  | 8.69               | 9.74  | 10.01              | 8.93    | 8.88  | 9.07               |
| sp <sup>2</sup> -II-1  | 5.89  | 5.62               | 6.60  | 6.42               | 5.96    | 5.85  | 7.25               |
| sp <sup>2</sup> -II-2  | 6.90  | 6.54               | 7.38  | 7.23               | 6.79    | 6.79  | 8.21               |
| sp <sup>2</sup> -II-3  | 8.01  | 7.48               | 8.38  | 8.10               | 7.28    | 7.47  | 8.65               |
| sp <sup>2</sup> -II-4  | 9.01  | 8.36               | 9.22  | 9.02               | 8.16    | 8.38  | 9.58               |
| sp <sup>2</sup> -II-5  | 10.10 | 9.36               | 10.19 | 10.06              | 9.02    | 9.39  | 10.20              |
| sp <sup>3</sup> -I-1   | 5.82  | 5.68               | 6.37  | 6.21               | 5.87    | 5.80  | 6.98               |
| sp <sup>3</sup> -I-2   | 6.57  | 6.38               | 7.02  | 6.87               | 6.44    | 6.48  | 7.61               |
| sp <sup>3</sup> -I-3   | 7.42  | 7.13               | 7.86  | 7.64               | 7.07    | 7.28  | 8.42               |
| sp <sup>3</sup> -I-4   | 7.88  | 7.53               | 8.38  | 8.23               | 7.70    | 7.84  | 8.89               |
| sp <sup>3</sup> -I-5   | -     | -                  | -     | -                  | 8.45    | 8.90  | 9.81               |
| sp <sup>3</sup> -I-6   | -     | -                  | -     | -                  | 9.16    | 9.66  | 10.59              |
| sp <sup>3</sup> -II-1  | 6.10  | 5.90               | 6.65  | 6.49               | 6.05    | 6.01  | 7.28               |
| sp <sup>3</sup> -II-2  | 6.82  | 6.60               | 7.34  | 7.12               | 6.57    | 6.70  | 7.85               |
| sp <sup>3</sup> -II-3  | 7.90  | 7.54               | 8.26  | 8.04               | 7.33    | 7.60  | 8.73               |
| sp <sup>3</sup> -II-4  | 8.40  | -                  | -     | -                  | 7.92    | 8.14  | 9.23               |
| sp <sup>3</sup> -II-5  | -     | -                  | -     | -                  | 8.50    | 8.85  | 9.85               |
| sp <sup>3</sup> -III-1 | 6.43  | 6.25               | 6.88  | 6.73               | 6.32    | 6.34  | 7.41               |
| sp <sup>3</sup> -III-2 | 7.29  | 7.02               | 7.64  | 7.49               | 6.99    | 7.11  | 8.10               |
| sp <sup>3</sup> -III-3 | 8.10  | 6.88               | 8.40  | 8.24               | 7.65    | 7.91  | 8.86               |
| sp <sup>3</sup> -III-4 | 8.48  | 8.03               | 8.86  | 8.73               | 8.17    | 8.38  | 9.30               |
| sp <sup>3</sup> -III-5 | 9.37  | -                  | -     | -                  | 8.83    | 9.29  | 10.09              |
| sp <sup>3</sup> -III-6 | -     | -                  | -     | -                  | 9.40    | 9.99  | 10.71              |
| sp <sup>3</sup> -III-7 | -     | -                  | -     | -                  | 10.04   | 10.80 | 11.43              |
| sp <sup>3</sup> -IV-1  | 5.71  | 5.58               | 6.25  | 6.12               | 5.78    | 5.69  | 6.82               |
| sp <sup>3</sup> -IV-2  | 6.45  | 6.27               | 6.90  | 6.77               | 6.33    | 6.36  | 7.46               |
| sp <sup>3</sup> -IV-3  | 7.12  | 6.85               | 7.52  | 7.36               | 6.83    | 6.97  | 8.02               |

|                                              |       |      |       |       |      |       |       |
|----------------------------------------------|-------|------|-------|-------|------|-------|-------|
| sp <sup>3</sup> -IV-4                        | 7.70  | 7.38 | 8.07  | 7.90  | 7.38 | 7.51  | 8.46  |
| sp <sup>3</sup> -IV-5                        | 8.54  | 8.14 | 8.88  | 8.67  | 8.07 | 8.37  | 9.27  |
| sp <sup>3</sup> -IV-6                        | 9.35  | -    | 9.60  | 9.40  | 8.68 | 9.05  | 9.90  |
| sp <sup>3</sup> -IV-7                        | 10.16 | 9.20 | 10.44 | 10.27 | 9.57 | 10.03 | 10.75 |
| 2,4,6-trinitrotoluene (TNT)                  |       |      |       |       |      | 7.13  |       |
| 1,3,5-Trinitro-1,3,5-triazinane (RDX)        |       |      |       |       |      | 8.81  |       |
| 1,3,5,7-Tetranitro-1,3,5,7-tetrazocane (HMX) |       |      |       |       |      | 8.91  |       |

| P (GPa)                | R: H  | R: CH <sub>3</sub> | R: OH | R: NH <sub>2</sub> | R: COOH | R: CN | R: NO <sub>2</sub> |
|------------------------|-------|--------------------|-------|--------------------|---------|-------|--------------------|
| sp <sup>2</sup> -I-1   | 10.22 | 9.19               | 13.15 | 12.26              | 12.24   | 11.03 | 18.66              |
| sp <sup>2</sup> -I-2   | 14.07 | 11.94              | 17.47 | 16.45              | 14.23   | 13.52 | 21.51              |
| sp <sup>2</sup> -I-3   | 17.00 | 16.14              | 22.75 | 20.22              | 18.05   | 17.71 | 24.94              |
| sp <sup>2</sup> -I-4   | 22.10 | 18.32              | 26.94 | 25.53              | 21.83   | 21.53 | 29.81              |
| sp <sup>2</sup> -I-5   | 31.66 | 25.64              | 35.77 | 36.45              | 28.93   | 28.13 | 37.91              |
| sp <sup>2</sup> -I-6   | 39.36 | 29.23              | 41.71 | 43.45              | 34.71   | 33.39 | 36.09              |
| sp <sup>2</sup> -II-1  | 10.99 | 9.88               | 15.17 | 13.58              | 13.20   | 11.91 | 20.22              |
| sp <sup>2</sup> -II-2  | 16.58 | 14.65              | 20.00 | 18.37              | 18.92   | 17.88 | 28.51              |
| sp <sup>2</sup> -II-3  | 24.34 | 20.36              | 27.56 | 24.28              | 21.49   | 21.68 | 31.16              |
| sp <sup>2</sup> -II-4  | 31.97 | 26.43              | 34.67 | 31.61              | 28.40   | 28.75 | 40.34              |
| sp <sup>2</sup> -II-5  | 41.97 | 33.29              | 43.74 | 41.18              | 35.77   | 37.69 | 46.88              |
| sp <sup>3</sup> -I-1   | 10.40 | 9.87               | 13.26 | 12.10              | 12.17   | 11.32 | 17.82              |
| sp <sup>3</sup> -I-2   | 14.14 | 13.24              | 17.01 | 15.71              | 15.42   | 15.06 | 22.30              |
| sp <sup>3</sup> -I-3   | 20.10 | 18.10              | 23.45 | 21.27              | 20.04   | 20.87 | 29.50              |
| sp <sup>3</sup> -I-4   | 21.77 | 19.46              | 26.20 | 24.37              | 23.41   | 23.65 | 32.37              |
| sp <sup>3</sup> -I-5   | -     | -                  | -     | -                  | 29.29   | 32.37 | 41.48              |
| sp <sup>3</sup> -I-6   | -     | -                  | -     | -                  | 35.76   | 39.57 | 50.06              |
| sp <sup>3</sup> -II-1  | 11.54 | 10.69              | 14.66 | 13.35              | 13.15   | 12.35 | 19.84              |
| sp <sup>3</sup> -II-2  | 15.28 | 14.21              | 18.89 | 16.90              | 16.23   | 16.40 | 24.07              |
| sp <sup>3</sup> -II-3  | 22.38 | 20.05              | 25.60 | 23.22              | 21.35   | 22.44 | 31.64              |
| sp <sup>3</sup> -II-4  | 25.32 | -                  | -     | -                  | 25.23   | 25.75 | 35.64              |
| sp <sup>3</sup> -II-5  | -     | -                  | -     | -                  | 29.43   | 31.04 | 41.28              |
| sp <sup>3</sup> -III-1 | 13.94 | 13.01              | 16.67 | 15.42              | 14.96   | 14.59 | 21.28              |
| sp <sup>3</sup> -III-2 | 19.13 | 17.43              | 21.72 | 20.21              | 19.19   | 19.36 | 26.63              |
| sp <sup>3</sup> -III-3 | 24.93 | 16.92              | 27.71 | 25.75              | 23.99   | 25.31 | 33.51              |
| sp <sup>3</sup> -III-4 | 27.27 | 23.70              | 31.02 | 29.23              | 27.64   | 28.58 | 37.05              |
| sp <sup>3</sup> -III-5 | 34.36 | -                  | -     | -                  | 32.99   | 43.56 | 45.02              |
| sp <sup>3</sup> -III-6 | -     | -                  | -     | -                  | 38.24   | 43.56 | 51.93              |
| sp <sup>3</sup> -III-7 | -     | -                  | -     | -                  | 44.59   | 52.32 | 60.64              |
| sp <sup>3</sup> -IV-1  | 10.44 | 9.88               | 13.18 | 12.23              | 12.04   | 11.17 | 17.26              |
| sp <sup>3</sup> -IV-2  | 14.35 | 13.36              | 21.89 | 15.96              | 15.25   | 14.88 | 21.89              |
| sp <sup>3</sup> -IV-3  | 18.48 | 16.71              | 21.30 | 19.78              | 18.49   | 18.84 | 26.46              |
| sp <sup>3</sup> -IV-4  | 21.18 | 19.03              | 24.22 | 22.40              | 21.32   | 21.39 | 28.89              |
| sp <sup>3</sup> -IV-5  | 27.99 | 24.75              | 31.41 | 28.82              | 26.97   | 28.68 | 36.90              |
| sp <sup>3</sup> -IV-6  | 34.40 | -                  | 37.56 | 34.80              | 31.65   | 34.06 | 42.84              |

|                                              |       |       |       |       |       |       |       |
|----------------------------------------------|-------|-------|-------|-------|-------|-------|-------|
| sp <sup>3</sup> -IV-7                        | 42.67 | 33.11 | 46.49 | 43.69 | 40.55 | 44.38 | 52.80 |
| 2,4,6-trinitrotoluene (TNT)                  |       |       |       |       |       | 20.90 |       |
| 1,3,5-Trinitro-1,3,5-triazinane (RDX)        |       |       |       |       |       | 34.13 |       |
| 1,3,5,7-Tetranitro-1,3,5,7-tetrazocane (HMX) |       |       |       |       |       | 35.23 |       |

---
